# Supplementary material for: Mechanistic studies on Cu(NO3)2/TEMPO-catalyzed aerobic oxidation of alcohols to carboxylic acids
Source: Royal Society of Chemistry journal article supplement (doi:10.1039/d4qo00791c), 2024-01-01

**Mechanistic studies on Cu(NO<sub>3</sub>)<sub>2</sub>/TEMPO-catalyzed aerobic  
oxidation of alcohols to carboxylic acids**

Yibo Yu,<sup>a</sup> Zhao Sun,<sup>b</sup> Yin-Long Guo,<sup>\*b</sup> Xue Zhang,<sup>\*b</sup> Hui Qian,<sup>\*a</sup> Shengming Ma<sup>\*a,b</sup>

<sup>a</sup> Research Center for Molecular Recognition and Synthesis, Department of Chemistry, Fudan University, 220 Handan Lu, Shanghai 200433, P. R. China.

<sup>b</sup> State Key Laboratory of Organometallic Chemistry, Shanghai Institute of Organic Chemistry, Chinese Academy of Sciences, 345 Lingling Lu, Shanghai 200032, P. R. China.

**Supplementary Information**

|                                                         |         |
|---------------------------------------------------------|---------|
| General Information                                     | S2      |
| Mechanistic studies                                     | S3-S18  |
| DFT calculation                                         | S19-S49 |
| References                                              | S50     |
| <sup>1</sup> H, <sup>13</sup> C NMR spectra of products | S51-S60 |

**General Information.** NMR spectra were taken with an Agilent-400 spectrometer (400 MHz for  $^1\text{H}$  NMR, 100 MHz for  $^{13}\text{C}$  NMR). Flue gas analysis experiments were performed with a Testo 350 flue gas analyzer. All reactions were carried out in 25 mL Schlenk tubes unless otherwise mentioned.  $\text{Cu}(\text{NO}_3)_2 \cdot 3\text{H}_2\text{O}$  and  $\text{KHSO}_4$  were purchased from Sinopharm Chemical Reagent Co., Ltd; TEMPO (98%) was purchased from Shanghai Darui Fine Chemical Co., Ltd.;  $\text{H}_2^{18}\text{O}$  (97%  $^{18}\text{O}$ ) was purchased from Meryer Co., Ltd.; DCE and  $\text{Et}_2\text{O}$  were used directly without further treatment unless otherwise noted. Anhydrous DCM and MeCN were used. Recovery of substrates was determined by  $^1\text{H}$  NMR analysis using dibromomethane as the internal standard.

SAESI-MS spectra were recorded on a Thermo TSQ Quantum Access triple-quadrupole mass spectrometer (Thermo Fisher Scientific, Waltham, MA) equipped with a home-made SAESI ion source in positive mode. The basic SAESI conditions were: vacuum,  $2.6 \times 10^{-6}$  torr; spray voltage, 3000 V; capillary temperature, 275 °C; sheath gas pressure of two sprayers, 3 arb. units; the collision energy of CID, 20 eV. Data acquisition and analysis were done with the Xcalibur (version 2.0, Thermo Fisher Scientific) software package. In this solvent-assisted electrospray ionization mass spectrometric experiment, the angle (a) between the two sprayers is 50° and the distance (b) between the tip of sprayers and the inlet to the mass is 5 mm. The chemical solutions were injected by a 500- $\mu\text{L}$  air-tight syringe with a speed at 20  $\mu\text{L}/\text{min}$  to SAESI-MS. The assisted solvent of acetonitrile was injected by another 500- $\mu\text{L}$  air-tight syringe with a speed at 5  $\mu\text{L}/\text{min}$ .

## Mechanistic studies

### (1) Determination of the order for alcohol **1a** (yyb-6-010).

A Schlenk tube was degassed to remove the air inside completely and refilled with O<sub>2</sub> with an O<sub>2</sub> balloon for three times. Then Cu(NO<sub>3</sub>)<sub>2</sub>•3H<sub>2</sub>O (48.0 mg, 0.2 mmol), TEMPO (31.8 mg, 0.2 mmol), KHSO<sub>4</sub> (27.1 mg, 0.2 mmol), **1a** (484.3 mg, 2.0 mmol), CH<sub>2</sub>Ph<sub>2</sub> (internal standard, 168.0 μL, d = 1.066 g/mL, 1.0 mmol), and DCE (8.0 mL) were added sequentially. An aliquot of the resulting mixture (about 0.1 mL) was taken after each indicated time shown in Table S1 and filtrated through a short column of silica gel eluted with DCM (2 x 5 mL). After evaporation, the NMR yield and recovery were determined by <sup>1</sup>H NMR analysis.

**Table S1.** Determination of the order for alcohol **1a**

| $n\text{-C}_{15}\text{H}_{31}\text{CH}_2\text{OH}$ | $\xrightarrow[\text{TEMPO (10 mol\%)}]{\text{Cu(NO}_3)_2\cdot 3\text{H}_2\text{O (10 mol\%)}}$ | $n\text{-C}_{15}\text{H}_{31}\text{CHO}$ |               |
|----------------------------------------------------|------------------------------------------------------------------------------------------------|------------------------------------------|---------------|
| <b>1a</b>                                          | $\xrightarrow[\text{DCE, O}_2 \text{ (balloon), rt, t}]{\text{KHSO}_4 \text{ (10 mol\%)}}$     | <b>2a'</b>                               |               |
| 2 mmol                                             | CH <sub>2</sub> Ph <sub>2</sub> as the internal standard                                       |                                          |               |
| Entry                                              | time (h)                                                                                       | Recovery of <b>1a</b> (%)                | [ <b>1a</b> ] |
| 1                                                  | 5                                                                                              | 97.5                                     | 0.24375       |
| 2                                                  | 7                                                                                              | 80.5                                     | 0.20125       |
| 3                                                  | 9                                                                                              | 64                                       | 0.16          |
| 4                                                  | 11                                                                                             | 46                                       | 0.115         |
| 5                                                  | 13                                                                                             | 29                                       | 0.0725        |

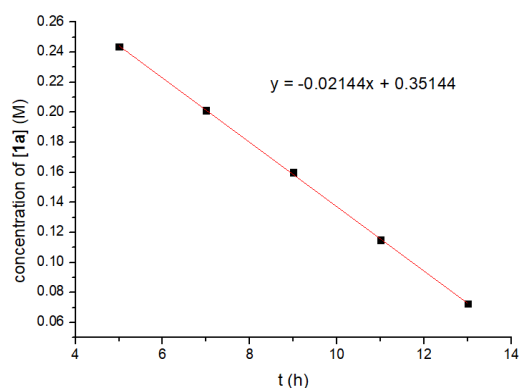

### (2) Determination of the order for aldehyde **2a'** (yyb-6-049).

A Schlenk tube was degassed to remove the air inside completely and refilled with O<sub>2</sub> with an O<sub>2</sub> balloon for three times. Then Cu(NO<sub>3</sub>)<sub>2</sub>•3H<sub>2</sub>O (24.8 mg, 0.1 mmol), TEMPO (16.1 mg, 0.1 mmol), KHSO<sub>4</sub> (13.7 mg, 0.1 mmol), **2a'** (240.4 mg, 1.0 mmol), CH<sub>2</sub>Ph<sub>2</sub> (internal standard, 84.0 μL, d = 1.066 g/mL, 0.5 mmol), H<sub>2</sub>O (0.1 mL), and DCE (4.0 mL) were added sequentially. An aliquot of the resulting mixture (about 0.1 mL) was taken after each indicated time shown in Table S2 and filtrated through a short column of silica gel eluted with DCM (2 x 5 mL). After evaporation, the NMR yield and recovery were determined by <sup>1</sup>H NMR analysis.

**Table S2.** Determination of the order for aldehyde **2a'**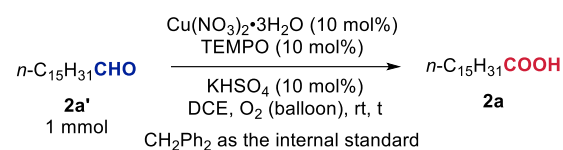

| Entry | time (h) | Recovery of <b>2a'</b> (%) | [ <b>2a'</b> ] (M) | ln[ <b>2a'</b> ] |
|-------|----------|----------------------------|--------------------|------------------|
| 1     | 2        | 70                         | 0.175              | -1.74297         |
| 2     | 3        | 59                         | 0.1475             | -1.91393         |
| 3     | 4        | 49                         | 0.1225             | -2.09964         |
| 4     | 5        | 41                         | 0.1025             | -2.27789         |
| 5     | 6        | 35                         | 0.0875             | -2.43612         |
| 6     | 7        | 29                         | 0.0725             | -2.62417         |
| 7     | 8        | 24                         | 0.06               | -2.81341         |

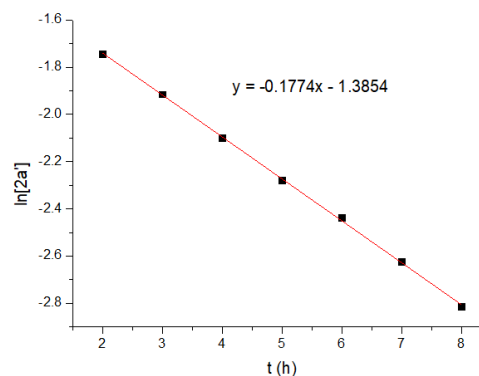

### (3) Detection of NO<sub>x</sub>

#### 1) Detection of NO<sub>x</sub> under standard conditions (yyb-6-130A)

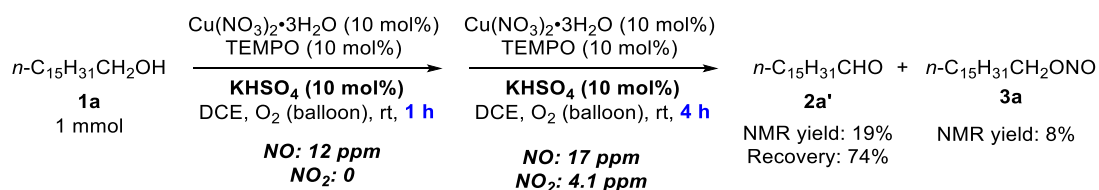

A Schlenk tube was degassed to remove the air inside and refilled with O<sub>2</sub> with an O<sub>2</sub> balloon for three times. Then Cu(NO<sub>3</sub>)<sub>2</sub>·3H<sub>2</sub>O (24.3 mg, 0.1 mmol), TEMPO (16.2 mg, 0.1 mmol), KHSO<sub>4</sub> (13.8 mg, 0.1 mmol), **1a** (242.8 mg, 1.0 mmol), and DCE (4.0 mL) were added sequentially. The Schlenk tube was then stirred at rt. After 1 h and 4 h, NO<sub>x</sub> was detected by the flue gas analyzer, respectively. The resulting mixture was filtrated through a short column of silica gel eluted with diethyl ether (3 x 25 mL) after 4 h. After evaporation, 35.0 μL of dibromomethane was added as the internal standard for <sup>1</sup>H NMR analysis: 19% of aldehyde **2a'** and 8% of nitrite **3a** were detected with 74% of alcohol **1a** recovered.

**2) Detection of NO<sub>x</sub> under standard conditions without addition of KHSO<sub>4</sub>**  
**(yyb-6-130B)**

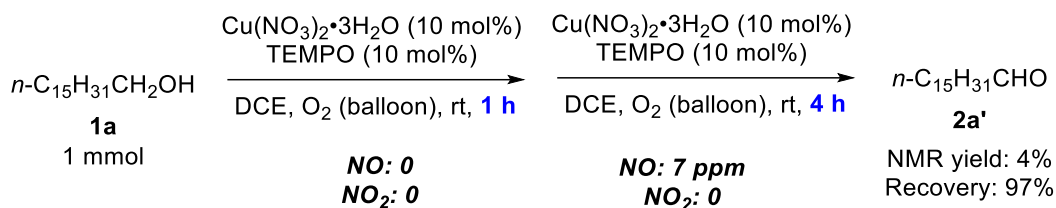

A Schlenk tube was degassed to remove the air inside and refilled with O<sub>2</sub> with an O<sub>2</sub> balloon for three times. Then Cu(NO<sub>3</sub>)<sub>2</sub>·3H<sub>2</sub>O (24.1 mg, 0.1 mmol), TEMPO (16.3 mg, 0.1 mmol), **1a** (242.5 mg, 1.0 mmol), and DCE (4.0 mL) were added sequentially. The Schlenk tube was then stirred at rt. After 1 h and 4 h, NO<sub>x</sub> was detected by the flue gas analyzer, respectively. The resulting mixture was filtrated through a short column of silica gel eluted with diethyl ether (3 x 25 mL) after 4 h. After evaporation, 35.0 μL of dibromomethane was added as the internal standard for <sup>1</sup>H NMR analysis: 4% of aldehyde **2a'** was detected with 97% of alcohol **1a** recovered.

**(4) Preparation of TEMPO<sup>+</sup>NO<sub>3</sub><sup>-</sup> (yyb-4-106)**

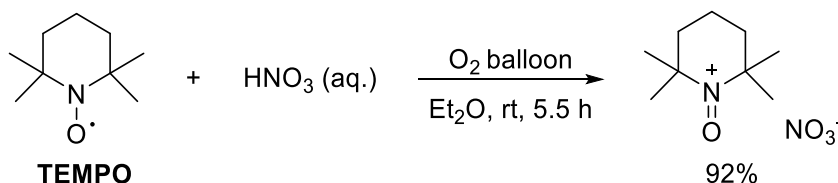

To a flask was added **TEMPO** (637.4 mg, 4.0 mmol) and the flask was degassed and refilled with argon for three times. After the addition of Et<sub>2</sub>O (60 mL) and conc. HNO<sub>3</sub> (67% aqueous solution, 564.0 mg, 6 mmol), the solution was stirred for 5.5 h under O<sub>2</sub> atmosphere until completion of the reaction as monitored by TLC (petroleum ether/ethyl acetate = 5/1) and turned colorless. The yellow precipitate was filtered, washed with Et<sub>2</sub>O (100 mL), and dried in vacuo to afford **TEMPO<sup>+</sup>NO<sub>3</sub><sup>-</sup>** (801.1 mg, 92%) as bright yellow solid.<sup>1</sup>

**TEMPO<sup>+</sup>NO<sub>3</sub><sup>-</sup>**: m.p. 118.6-120.3 °C (decomposition, diethyl ether/dichloromethane) (reported:<sup>1b</sup> m.p. 110-120 °C (decomposition)); **IR** (neat, cm<sup>-1</sup>): 1621, 1471, 1396, 1379, 1320; **MS** (ESI) *m/z*: 156 (M-NO<sub>3</sub><sup>-</sup>)<sup>+</sup>; **HRMS** calcd *m/z* for C<sub>9</sub>H<sub>18</sub>NO [M-NO<sub>3</sub><sup>-</sup>]<sup>+</sup>:

156.1383, found 156.1381. **Anal. Calcd.** For C<sub>9</sub>H<sub>18</sub>N<sub>2</sub>O<sub>4</sub>: C 49.53, H 8.31; found C 48.96, H 8.63.

**(5) Aerobic oxidation of alcohol 1a with TEMPO<sup>+</sup>NO<sub>3</sub><sup>-</sup> as catalyst**

**1) TEMPO<sup>+</sup>NO<sub>3</sub><sup>-</sup> as catalyst without the assistance of NO<sub>2</sub> (yyb-8-053B)**

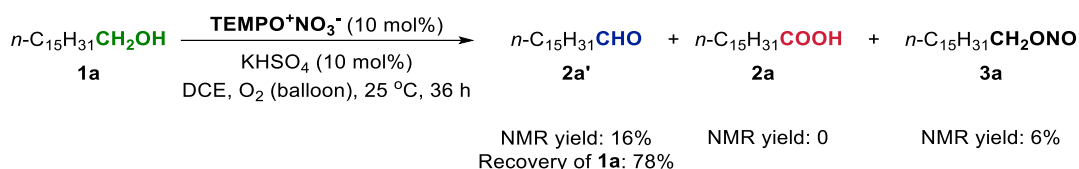

A Schlenk tube was degassed to remove the air inside completely and refilled with O<sub>2</sub> with an O<sub>2</sub> balloon for three times. Then TEMPO<sup>+</sup>NO<sub>3</sub><sup>-</sup> (21.8 mg, 0.1 mmol), KHSO<sub>4</sub> (13.5 mg, 0.1 mmol), **1a** (242.8 mg, 1.0 mmol), and DCE (4.0 mL) were added sequentially. The resulting mixture was then stirred at 25 °C for 36 h and filtrated through a short column of silica gel eluted with diethyl ether (3 x 25 mL). After evaporation, 35.0 μL of dibromomethane was added as the internal standard for <sup>1</sup>H NMR analysis: 16% of aldehyde **2a'** and 6% of nitrite **3a** were detected with 78% of alcohol **1a** recovered.

**2) TEMPO<sup>+</sup>NO<sub>3</sub><sup>-</sup> as catalyst with the assistance of NO<sub>2</sub> (yyb-8-055B)**

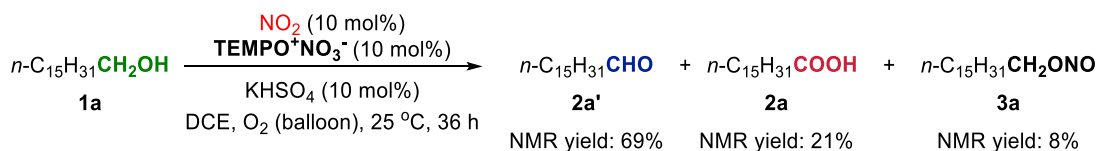

To an oven-dried Schlenk tube were added TEMPO<sup>+</sup>NO<sub>3</sub><sup>-</sup> (21.9 mg, 0.1 mmol), KHSO<sub>4</sub> (13.9 mg, 0.1 mmol), and **1a** (242.3 mg, 1.0 mmol). Then the tube was degassed to remove the air inside followed by the injection of NO<sub>2</sub> (2.4 mL, 0.1 mmol) with a syringe and refilled O<sub>2</sub> using an O<sub>2</sub> balloon followed by the addition of DCE (4.0 mL). The resulting mixture was then stirred at 25 °C for 36 h and filtrated through a short column of silica gel eluted with diethyl ether (3 x 25 mL). After evaporation, 35.0 μL of dibromomethane was added as the standard for <sup>1</sup>H NMR analysis: 69% of aldehyde **2a'**, 21% of carboxylic acid **2a** and 8% of nitrite **3a** were detected.

## (6) Aerobic oxidation of aldehyde **2a'** to carboxylic acid **2a**

### 1) Aerobic oxidation of aldehyde **2a'** via TEMPO/NO<sub>2</sub> system (yyb-8-057B)

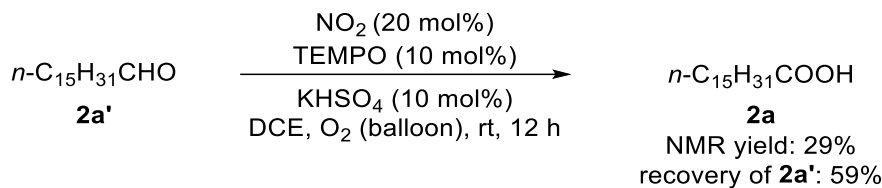

To an oven-dried Schlenk tube were added TEMPO (8.0 mg, 0.05 mmol), KHSO<sub>4</sub> (6.7 mg, 0.05 mmol), and **2a'** (120.6 mg, 0.5 mmol). Then the tube was degassed to remove the air inside followed by the injection of NO<sub>2</sub> (2.4 mL, 0.1 mmol) with a syringe and refilled O<sub>2</sub> using an O<sub>2</sub> balloon. DCE (2.0 mL) was added. The resulting mixture was stirred at rt for 12 h and filtrated through a short column of silica gel eluted with diethyl ether (3 x 25 mL). After evaporation, 35.0 μL of dibromomethane was added as the internal standard for <sup>1</sup>H NMR analysis: 29% of carboxylic acid **2a** was detected with 59% of aldehyde **2a'** recovered.

### 2) Aerobic oxidation of aldehyde **2a'** under standard conditions (yyb-6-051A)

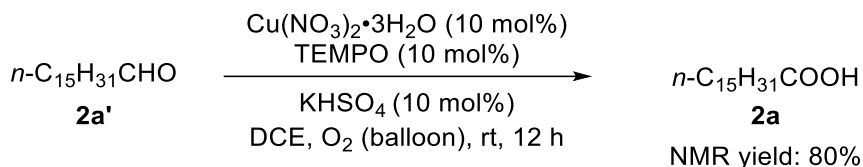

A Schlenk tube was degassed to remove the air inside and refilled with O<sub>2</sub> with an O<sub>2</sub> balloon for three times. Then Cu(NO<sub>3</sub>)<sub>2</sub>·3H<sub>2</sub>O (12.0 mg, 0.05 mmol), TEMPO (7.9 mg, 0.05 mmol), KHSO<sub>4</sub> (6.9 mg, 0.05 mmol), **2a'** (119.8 mg, 0.5 mmol), and DCE (2.0 mL) were added sequentially. The resulting mixture was stirred at rt for 12 h and filtrated through a short column of silica gel eluted with diethyl ether (3 x 25 mL). After evaporation, 35.0 μL of dibromomethane was added as the internal standard for <sup>1</sup>H NMR analysis: 80% of carboxylic acid **2a** was detected.

## (7) $^{18}\text{O}$ labelling experiments of alcohol **1a**

### 1) $^{18}\text{O}$ labelling experiment with 1 equiv of $\text{H}_2^{18}\text{O}$ (yyb-5-162)

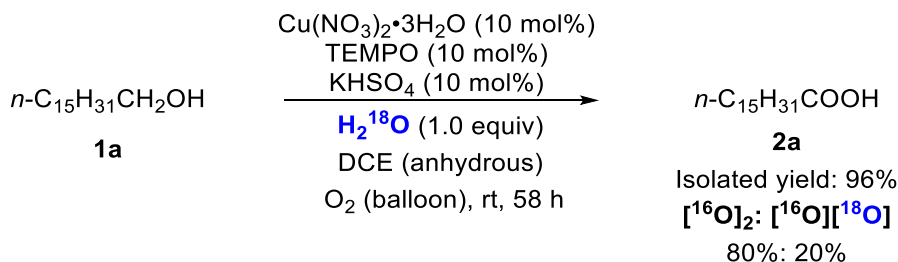

**Typical Procedure I:** A Schlenk tube was degassed to remove the air inside, and refilled with  $\text{O}_2$  using an  $\text{O}_2$  balloon for three times. Then  $\text{Cu(NO}_3)_2 \cdot 3\text{H}_2\text{O}$  (24.7 mg, 0.1 mmol), TEMPO (16.0 mg, 0.1 mmol),  $\text{KHSO}_4$  (13.9 mg, 0.1 mmol), **1a** (241.7 mg, 1.0 mmol),  $\text{H}_2^{18}\text{O}$  (18.0  $\mu\text{L}$ , 20.0 mg,  $d = 1.11 \text{ g/mL}$ , 1.0 mmol), and anhydrous DCE (4.0 mL) were added sequentially. The resulting mixture was stirred at room temperature until the completion of the reaction as monitored by TLC (petroleum ether/ethyl acetate = 5/1) (36 h) and filtrated through a short column of silica gel eluted with diethyl ether (3 x 25 mL). After evaporation, the residue was purified by chromatography on silica gel to afford **2a** (245.9 mg, 96%) [eluent: petroleum ether/ethyl acetate = 20/1 (~210 mL) to 5/1 (~240 mL)] as white solid;  $^1\text{H NMR}$  (400 MHz,  $\text{CDCl}_3$ ):  $\delta = 2.34$  (t,  $J = 7.6 \text{ Hz}$ , 2 H,  $\text{CH}_2$ ), 1.70-1.57 (m, 2 H,  $\text{CH}_2$ ), 1.42-1.17 (m, 24 H, 12 x  $\text{CH}_2$ ), 0.88 (t,  $J = 6.6 \text{ Hz}$ , 3 H,  $\text{CH}_3$ );  $^{13}\text{C NMR}$  (100 MHz,  $\text{CDCl}_3$ ):  $\delta = 180.4, 34.1, 31.9, 29.68, 29.66, 29.58, 29.43, 29.36, 29.2, 29.1, 24.7, 22.7, 14.1$ ; **MS** (70 eV, EI)  $m/z$  (%): 258 (M ( $^{16}\text{O}$ ) ( $^{18}\text{O}$ )<sup>+</sup>, 19.24), 256 (M ( $^{16}\text{O}$ )<sub>2</sub><sup>+</sup>, 76.7), 73 (100).

The  $^{18}\text{O}$ % incorporation of **2a**- $^{18}\text{O}$  was determined via the analysis of MS spectrum. Based on the known natural abundance of the stable isotopes of C, H, and O, the naturally occurring isotopic  $^{18}\text{O}$  will also produce [M ( $^{18}\text{O}$ )]<sup>+</sup> peak. According to the natural abundance of  $^{18}\text{O}$ , the ratio of  $\text{C}_{16}\text{H}_{32}^{16}\text{O}_2$ : $\text{C}_{16}\text{H}_{32}^{16}\text{O}^{18}\text{O}$  is 99.76:0.2. Thus, the intensity of [M ( $^{16}\text{O}$ ) ( $^{18}\text{O}$ )] ( $\text{C}_{16}\text{H}_{32}^{16}\text{O}^{18}\text{O}$ ) peak will be 0.2% of the intensity of the molecular peak [M ( $^{16}\text{O}$ )<sub>2</sub>] ( $\text{C}_{16}\text{H}_{32}^{16}\text{O}_2$ ). According to the MS spectrum of **2a**- $^{18}\text{O}$ , the relative abundance of **2a**-( $^{16}\text{O}$ )<sub>2</sub> 256 [M ( $^{16}\text{O}$ )<sub>2</sub>] and **2a**-( $^{16}\text{O}$ ) ( $^{18}\text{O}$ ) 258 [M ( $^{16}\text{O}$ ) ( $^{18}\text{O}$ )] are 76.7 and 19.24, respectively. Since there was no detected contributions to the isotope peak intensities from background peaks or from impurities in the sample



according to the MS spectrum of **2a**, the  $^{18}\text{O}$  incorporation of **2a** can be calculated as follows:  $([\text{M} (^{16}\text{O}) (^{18}\text{O})]^+ - [\text{M} (^{16}\text{O})_2]^+ \times 0.2\%)/([\text{M} (^{16}\text{O}) (^{18}\text{O})]^+ - [\text{M} (^{16}\text{O})_2]^+ \times 0.2\% + [\text{M} (^{16}\text{O})_2]^+) = (19.24 - 76.7 \times 0.2\%)/(19.24 - 76.7 \times 0.2\% + 76.7) = 20\%$ .

## 2) $^{18}\text{O}$ labelling experiment with $^{18}\text{O}_2$ (yyb-5-178)

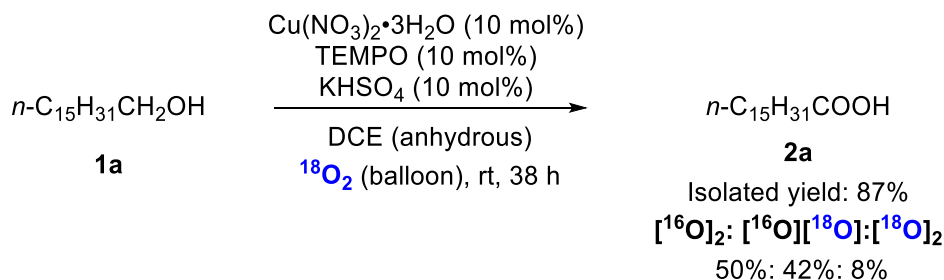

Following **Typical Procedure I**, the reaction of **1a** (121.9 mg, 0.5 mmol),  $\text{Cu(NO}_3)_2 \cdot 3\text{H}_2\text{O}$  (12.5 mg, 0.05 mmol), TEMPO (8.2 mg, 0.05 mmol), and  $\text{KHSO}_4$  (7.0 mg, 0.05 mmol) in anhydrous DCE (2.0 mL) afforded **2a** (113.2 mg, 87%) [eluent: petroleum ether/ethyl acetate = 15/1 (~320 mL) to 5/1 (~240 mL)] as white solid;  $^1\text{H NMR}$  (400 MHz,  $\text{CDCl}_3$ ):  $\delta = 2.35$  (t,  $J = 7.4$  Hz, 2 H,  $\text{CH}_2$ ), 1.63 (quintet,  $J = 7.2$  Hz, 2 H,  $\text{CH}_2$ ), 1.37-1.14 (m, 24 H, 12 x  $\text{CH}_2$ ), 0.88 (t,  $J = 6.6$  Hz, 3 H,  $\text{CH}_3$ );  $^{13}\text{C NMR}$  (100 MHz,  $\text{CDCl}_3$ ):  $\delta = 179.9, 34.0, 31.9, 29.7, 29.64, 29.62, 29.58, 29.4, 29.3, 29.2, 29.0, 24.7, 22.7, 14.1$ ; **MS** (70 eV, EI)  $m/z$  (%): 260 ( $\text{M} (^{18}\text{O})_2^+$ , 17.3), 258 ( $\text{M} (^{16}\text{O}) (^{18}\text{O})^+$ , 85.23), 256 ( $\text{M} (^{16}\text{O})_2^+$ , 100).

The  $^{18}\text{O}$ % incorporation of **2a**- $^{18}\text{O}$  was determined via the analysis of MS spectrum. Based on the known natural abundance of the stable isotopes of C, H, and O, the naturally occurring isotopic  $^{18}\text{O}$  will also produce  $[\text{M} (^{18}\text{O})]^+$  peak. According to the natural abundance of  $^{18}\text{O}$ , the ratio of  $\text{C}_{16}\text{H}_{32}^{16}\text{O}_2$ : $\text{C}_{16}\text{H}_{32}^{16}\text{O}^{18}\text{O}$  is 99.76:0.2. Thus, the intensity of  $[\text{M} (^{16}\text{O}) (^{18}\text{O})]$  ( $\text{C}_{16}\text{H}_{32}^{16}\text{O}^{18}\text{O}$ ) peak will be 0.2% of the intensity of the molecular peak  $[\text{M} (^{16}\text{O})_2]$  ( $\text{C}_{16}\text{H}_{32}^{16}\text{O}_2$ ). According to the MS spectrum of **2a**- $^{18}\text{O}$ , the relative abundance of **2a**- $(^{16}\text{O})_2$  256  $[\text{M} (^{16}\text{O})_2]$  and **2a**- $(^{16}\text{O}) (^{18}\text{O})$  258  $[\text{M} (^{16}\text{O}) (^{18}\text{O})]$  are 100 and 85.23, respectively. Since there was no detected contributions to the isotope peak intensities from background peaks or from impurities in the sample according to the MS spectrum of **2a**, the incorporation of **2a**- $(^{16}\text{O}) (^{18}\text{O})$  in **2a**- $(^{16}\text{O}) (^{18}\text{O})$  and **2a**- $(^{16}\text{O})_2$  can be calculated as follows:  $([\text{M} (^{16}\text{O}) (^{18}\text{O})]^+ - [\text{M} (^{16}\text{O})_2]^+ \times 0.2\%)/([\text{M} (^{16}\text{O}) (^{18}\text{O})]^+ - [\text{M} (^{16}\text{O})_2]^+ \times 0.2\% + [\text{M} (^{16}\text{O})_2]^+) = 20\%$ .

$$(^{18}\text{O})^+ - [\text{M}(^{16}\text{O})_2]^+ \times 0.2\% + [\text{M}(^{16}\text{O})(^{18}\text{O})]^+ = (85.23 - 100 \times 0.2\%) / (85.23 - 100 \times 0.2\% + 100) = 46\%.$$

Besides, the ratio of  $\text{C}_{16}\text{H}_{32}^{16}\text{O}^{18}\text{O}:\text{C}_{16}\text{H}_{32}^{18}\text{O}_2$  is also 99.76:0.2. Thus, the intensity of  $[\text{M}(^{18}\text{O})_2]$  ( $\text{C}_{16}\text{H}_{32}^{18}\text{O}_2$ ) peak will be 0.2% of the intensity of the molecular peak  $[\text{M}(^{16}\text{O})(^{18}\text{O})]$  ( $\text{C}_{16}\text{H}_{32}^{16}\text{O}^{18}\text{O}$ ). According to the MS spectrum of  $\mathbf{2a}^{18}\text{O}$ , the relative abundance of  $\mathbf{2a}-(^{16}\text{O})(^{18}\text{O})$  258  $[\text{M}(^{16}\text{O})(^{18}\text{O})]$  and  $\mathbf{2a}-(^{18}\text{O})_2$  260  $[\text{M}(^{18}\text{O})_2]$  are 85.23 and 17.3, respectively. Since there was no detected contributions to the isotope peak intensities from background peaks or from impurities in the sample according to the MS spectrum of  $\mathbf{2a}$ , the incorporation of  $\mathbf{2a}-(^{18}\text{O})_2$  in  $\mathbf{2a}-(^{16}\text{O})(^{18}\text{O})$  and  $\mathbf{2a}-(^{18}\text{O})_2$  can be calculated as follows:  $([\text{M}(^{18}\text{O})_2]^+ - [\text{M}(^{16}\text{O})(^{18}\text{O})]^+ \times 0.2\%) / ([\text{M}(^{18}\text{O})_2]^+ - [\text{M}(^{16}\text{O})(^{18}\text{O})]^+ \times 0.2\% + [\text{M}(^{16}\text{O})(^{18}\text{O})]^+) = (17.3 - 85.23 \times 0.2\%) / (17.3 - 85.23 \times 0.2\% + 85.23) = 17\%$ . Based on these results, the ratio of  $\text{C}_{16}\text{H}_{32}^{16}\text{O}_2:\text{C}_{16}\text{H}_{32}^{16}\text{O}^{18}\text{O}$  is 54%:46%, and the ratio of  $\text{C}_{16}\text{H}_{32}^{16}\text{O}^{18}\text{O}:\text{C}_{16}\text{H}_{32}^{18}\text{O}_2$  is 83%:17%.

To sum up, the ratio of  $\text{C}_{16}\text{H}_{32}^{16}\text{O}_2:\text{C}_{16}\text{H}_{32}^{16}\text{O}^{18}\text{O}:\text{C}_{16}\text{H}_{32}^{18}\text{O}_2$  is 54%:46%:(17×46/83)% = 50%:42%:8% (based on 100%).

## (8) $^{18}\text{O}$ labelling experiments of aldehyde $\mathbf{2a}'$

### 1) $^{18}\text{O}$ labelling experiment with $^{18}\text{O}_2$ (yyb-8-047)

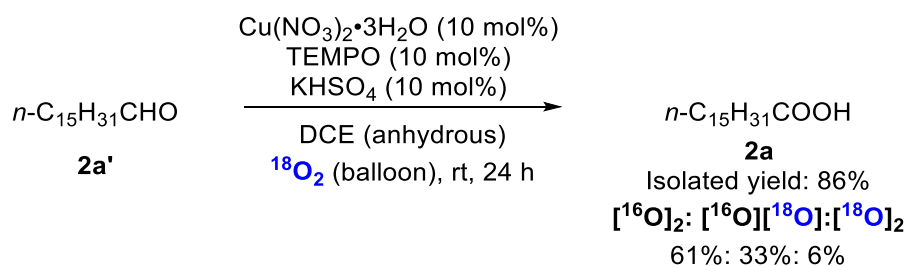

Following **Typical Procedure I**, the reaction of  $\mathbf{2a}'$  (120.3 mg, 0.5 mmol),  $\text{Cu}(\text{NO}_3)_2 \cdot 3\text{H}_2\text{O}$  (12.5 mg, 0.05 mmol), TEMPO (8.1 mg, 0.05 mmol), and  $\text{KHSO}_4$  (6.6 mg, 0.05 mmol) in anhydrous DCE (2.0 mL) afforded  $\mathbf{2a}$  (110.6 mg, 86%) [eluent: petroleum ether/ethyl acetate = 15/1 (~160 mL) to 5/1 (~180 mL)] as white solid;  $^1\text{H}$  NMR (400 MHz,  $\text{CDCl}_3$ ):  $\delta$  = 2.35 (t,  $J$  = 7.4 Hz, 2 H,  $\text{CH}_2$ ), 1.63 (quintet,  $J$  = 7.3 Hz, 2 H,  $\text{CH}_2$ ), 1.38-1.19 (m, 24 H, 12 x  $\text{CH}_2$ ), 0.88 (t,  $J$  = 6.6 Hz, 3 H,  $\text{CH}_3$ );  $^{13}\text{C}$  NMR (100 MHz,  $\text{CDCl}_3$ ):  $\delta$  = 180.2, 34.0, 31.9, 29.67, 29.66, 29.64, 29.62, 29.58, 29.4, 29.3,

29.2, 29.0, 24.7, 22.7, 14.1; **MS** (70 eV, EI)  $m/z$  (%): 260 ( $M (^{18}O)_2^+$ , 7.58), 258 ( $M (^{16}O) (^{18}O)^+$ , 39.13), 256 ( $M (^{16}O)_2^+$ , 71.1).

The  $^{18}O$ % incorporation of **2a**- $^{18}O$  was determined via the analysis of MS spectrum. Based on the known natural abundance of the stable isotopes of C, H, and O, the naturally occurring isotopic  $^{18}O$  will also produce  $[M (^{18}O)]^+$  peak. According to the natural abundance of  $^{18}O$ , the ratio of  $C_{16}H_{32}^{16}O_2:C_{16}H_{32}^{16}O^{18}O$  is 99.76:0.2. Thus, the intensity of  $[M (^{16}O) (^{18}O)]$  ( $C_{16}H_{32}^{16}O^{18}O$ ) peak will be 0.2% of the intensity of the molecular peak  $[M (^{16}O)_2]$  ( $C_{16}H_{32}^{16}O_2$ ). According to the MS spectrum of **2a**- $^{18}O$ , the relative abundance of **2a**- $(^{16}O)_2$  256  $[M (^{16}O)_2]$  and **2a**- $(^{16}O) (^{18}O)$  258  $[M (^{16}O) (^{18}O)]$  are 71.1 and 39.13, respectively. Since there was no detected contributions to the isotope peak intensities from background peaks or from impurities in the sample according to the MS spectrum of **2a**, the incorporation of **2a**- $(^{16}O) (^{18}O)$  in **2a**- $(^{16}O) (^{18}O)$  and **2a**- $(^{16}O)_2$  can be calculated as follows:  $([M (^{16}O) (^{18}O)]^+ - [M (^{16}O)_2]^+ \times 0.2\%)/([M (^{16}O) (^{18}O)]^+ - [M (^{16}O)_2]^+ \times 0.2\% + [M (^{16}O)_2]^+) = (39.13 - 71.1 \times 0.2\%)/(39.13 - 71.1 \times 0.2\% + 71.1) = 35\%$ .

Besides, the ratio of  $C_{16}H_{32}^{16}O^{18}O:C_{16}H_{32}^{18}O_2$  is also 99.76:0.2. Thus, the intensity of  $[M (^{18}O)_2]$  ( $C_{16}H_{32}^{18}O_2$ ) peak will be 0.2% of the intensity of the molecular peak  $[M (^{16}O) (^{18}O)]$  ( $C_{16}H_{32}^{16}O^{18}O$ ). According to the MS spectrum of **2a**- $^{18}O$ , the relative abundance of **2a**- $(^{16}O) (^{18}O)$  258  $[M (^{16}O) (^{18}O)]$  and **2a**- $(^{18}O)_2$  260  $[M (^{18}O)_2]$  are 39.13 and 7.58, respectively. Since there was no detected contributions to the isotope peak intensities from background peaks or from impurities in the sample according to the MS spectrum of **2a**, the incorporation of **2a**- $(^{18}O)_2$  in **2a**- $(^{16}O) (^{18}O)$  and **2a**- $(^{18}O)_2$  can be calculated as follows:  $([M (^{18}O)_2]^+ - [M (^{16}O) (^{18}O)]^+ \times 0.2\%)/([M (^{18}O)_2]^+ - [M (^{16}O) (^{18}O)]^+ \times 0.2\% + [M (^{16}O) (^{18}O)]^+) = (7.58 - 39.13 \times 0.2\%)/(7.58 - 39.13 \times 0.2\% + 39.13) = 16\%$ . Based on these results, the ratio of  $C_{16}H_{32}^{16}O_2:C_{16}H_{32}^{16}O^{18}O$  is 65%:35%, and the ratio of  $C_{16}H_{32}^{16}O^{18}O:C_{16}H_{32}^{18}O_2$  is 84%:16%.

To sum up, the ratio of  $C_{16}H_{32}^{16}O_2:C_{16}H_{32}^{16}O^{18}O:C_{16}H_{32}^{18}O_2$  is 65%:35%:(16×35/84)% = 61%:33%:6% (based on 100%).

## 2) $^{18}\text{O}$ labelling experiment with 1 equiv of $\text{H}_2^{18}\text{O}$ (yyb-8-046)

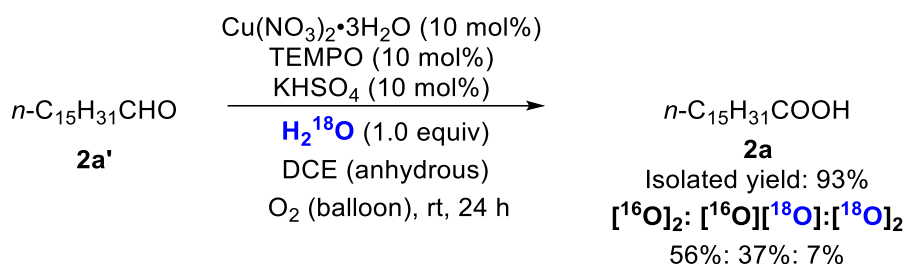

Following **Typical Procedure I**, the reaction of **2a'** (120.2 mg, 0.5 mmol),  $\text{Cu(NO}_3)_2 \cdot 3\text{H}_2\text{O}$  (12.2 mg, 0.05 mmol), TEMPO (8.3 mg, 0.05 mmol),  $\text{KHSO}_4$  (6.9 mg, 0.05 mmol), and  $\text{H}_2^{18}\text{O}$  (9.0  $\mu\text{L}$ , 10.0 mg,  $d = 1.11 \text{ g/mL}$ , 0.5 mmol) in anhydrous DCE (2.0 mL) afforded **2a** (119.6 mg, 93%) [eluent: petroleum ether/ethyl acetate = 15/1 (~160 mL) to 5/1 (~180 mL)] as white solid;  $^1\text{H NMR}$  (400 MHz,  $\text{CDCl}_3$ ):  $\delta = 2.34$  (t,  $J = 7.4 \text{ Hz}$ , 2 H,  $\text{CH}_2$ ), 1.70-1.56 (m, 2 H,  $\text{CH}_2$ ), 1.38-1.17 (m, 24 H, 12 x  $\text{CH}_2$ ), 0.88 (t,  $J = 6.6 \text{ Hz}$ , 3 H,  $\text{CH}_3$ );  $^{13}\text{C NMR}$  (100 MHz,  $\text{CDCl}_3$ ):  $\delta = 180.4, 34.1, 31.9, 29.67, 29.66, 29.6, 29.4, 29.3, 29.2, 29.0, 24.7, 22.7, 14.1$ ; **MS** (70 eV, EI)  $m/z$  (%): 260 ( $\text{M} (^{18}\text{O})_2^+$ , 9.26), 258 ( $\text{M} (^{16}\text{O}) (^{18}\text{O})^+$ , 48.24), 256 ( $\text{M} (^{16}\text{O})_2^+$ , 70.81).

The  $^{18}\text{O}\%$  incorporation of **2a**- $^{18}\text{O}$  was determined via the analysis of MS spectrum. Based on the known natural abundance of the stable isotopes of C, H, and O, the naturally occurring isotopic  $^{18}\text{O}$  will also produce  $[\text{M} (^{18}\text{O})]^+$  peak. According to the natural abundance of  $^{18}\text{O}$ , the ratio of  $\text{C}_{16}\text{H}_{32}^{16}\text{O}_2:\text{C}_{16}\text{H}_{32}^{16}\text{O}^{18}\text{O}$  is 99.76:0.2. Thus, the intensity of  $[\text{M} (^{16}\text{O}) (^{18}\text{O})]$  ( $\text{C}_{16}\text{H}_{32}^{16}\text{O}^{18}\text{O}$ ) peak will be 0.2% of the intensity of the molecular peak  $[\text{M} (^{16}\text{O})_2]$  ( $\text{C}_{16}\text{H}_{32}^{16}\text{O}_2$ ). According to the MS spectrum of **2a**- $^{18}\text{O}$ , the relative abundance of **2a**- $(^{16}\text{O})_2$  256  $[\text{M} (^{16}\text{O})_2]$  and **2a**- $(^{16}\text{O}) (^{18}\text{O})$  258  $[\text{M} (^{16}\text{O}) (^{18}\text{O})]$  are 70.81 and 48.24, respectively. Since there was no detected contributions to the isotope peak intensities from background peaks or from impurities in the sample according to the MS spectrum of **2a**, the incorporation of **2a**- $(^{16}\text{O}) (^{18}\text{O})$  in **2a**- $(^{16}\text{O}) (^{18}\text{O})$  and **2a**- $(^{16}\text{O})_2$  can be calculated as follows:  $([\text{M} (^{16}\text{O}) (^{18}\text{O})]^+ - [\text{M} (^{16}\text{O})_2]^+ \times 0.2\%)/([\text{M} (^{16}\text{O}) (^{18}\text{O})]^+ - [\text{M} (^{16}\text{O})_2]^+ \times 0.2\% + [\text{M} (^{16}\text{O})_2]^+) = (48.24 - 70.81 \times 0.2\%)/(48.24 - 70.81 \times 0.2\% + 70.81) = 40\%$ .

Besides, the ratio of  $\text{C}_{16}\text{H}_{32}^{16}\text{O}^{18}\text{O}:\text{C}_{16}\text{H}_{32}^{18}\text{O}_2$  is also 99.76:0.2. Thus, the intensity of  $[\text{M} (^{18}\text{O})_2]$  ( $\text{C}_{16}\text{H}_{32}^{18}\text{O}_2$ ) peak will be 0.2% of the intensity of the molecular peak  $[\text{M}$

(<sup>16</sup>O) (<sup>18</sup>O)] (C<sub>16</sub>H<sub>32</sub><sup>16</sup>O<sup>18</sup>O). According to the MS spectrum of **2a**-<sup>18</sup>O, the relative abundance of **2a**-(<sup>16</sup>O) (<sup>18</sup>O) 258 [M (<sup>16</sup>O) (<sup>18</sup>O)] and **2a**-(<sup>18</sup>O)<sub>2</sub> 260 [M (<sup>18</sup>O)<sub>2</sub>] are 48.24 and 9.26, respectively. Since there was no detected contributions to the isotope peak intensities from background peaks or from impurities in the sample according to the MS spectrum of **2a**, the incorporation of **2a**-(<sup>18</sup>O)<sub>2</sub> in **2a**-(<sup>16</sup>O) (<sup>18</sup>O) and **2a**-(<sup>18</sup>O)<sub>2</sub> can be calculated as follows: ([M (<sup>18</sup>O)<sub>2</sub>]<sup>+</sup> - [M (<sup>16</sup>O) (<sup>18</sup>O)]<sup>+</sup> × 0.2%)/([M (<sup>18</sup>O)<sub>2</sub>]<sup>+</sup> - [M (<sup>16</sup>O) (<sup>18</sup>O)]<sup>+</sup> × 0.2% + [M (<sup>16</sup>O) (<sup>18</sup>O)]<sup>+</sup>) = (9.26 - 48.24 × 0.2%)/(9.26 - 48.24 × 0.2% + 48.24) = 16%. Based on these results, the ratio of C<sub>16</sub>H<sub>32</sub><sup>16</sup>O<sub>2</sub>:C<sub>16</sub>H<sub>32</sub><sup>16</sup>O<sup>18</sup>O is 60%:40%, and the ratio of C<sub>16</sub>H<sub>32</sub><sup>16</sup>O<sup>18</sup>O:C<sub>16</sub>H<sub>32</sub><sup>18</sup>O<sub>2</sub> is 84%:16%.

To sum up, the ratio of C<sub>16</sub>H<sub>32</sub><sup>16</sup>O<sub>2</sub>:C<sub>16</sub>H<sub>32</sub><sup>16</sup>O<sup>18</sup>O:C<sub>16</sub>H<sub>32</sub><sup>18</sup>O<sub>2</sub> is 60%:40%:(16×40/84)% = 56%:37%:7% (based on 100%).

### 3) <sup>18</sup>O labelling experiment with 2 equiv of H<sub>2</sub><sup>18</sup>O (yyb-8-063)

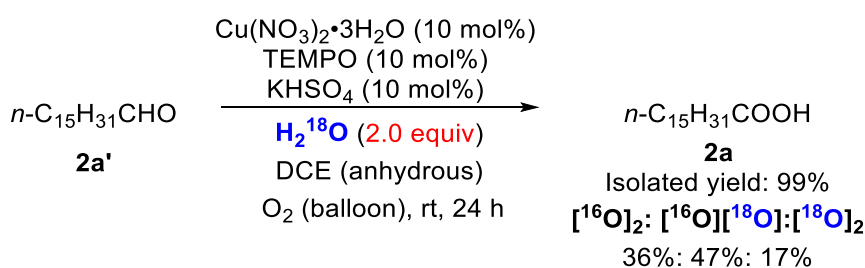

Following **Typical Procedure I**, the reaction of **2a'** (120.3 mg, 0.5 mmol), Cu(NO<sub>3</sub>)<sub>2</sub>·3H<sub>2</sub>O (12.1 mg, 0.05 mmol), TEMPO (8.0 mg, 0.05 mmol), KHSO<sub>4</sub> (7.0 mg, 0.05 mmol), and H<sub>2</sub><sup>18</sup>O (18.0 μL, 20.0 mg, d = 1.11 g/mL, 1.0 mmol) in anhydrous DCE (2.0 mL) afforded **2a** (127.9 mg, 99%) [eluent: petroleum ether/ethyl acetate = 15/1 (~160 mL) to 5/1 (~180 mL)] as white solid; <sup>1</sup>H NMR (400 MHz, CDCl<sub>3</sub>): δ = 2.34 (t, *J* = 7.4 Hz, 2 H, CH<sub>2</sub>), 1.63 (quintet, *J* = 7.3 Hz, 2 H, CH<sub>2</sub>), 1.38-1.19 (m, 24 H, 12 x CH<sub>2</sub>), 0.88 (t, *J* = 6.8 Hz, 3 H, CH<sub>3</sub>); <sup>13</sup>C NMR (100 MHz, CDCl<sub>3</sub>): δ = 180.32, 180.30, 34.1, 31.9, 29.67, 29.66, 29.64, 29.62, 29.58, 29.4, 29.3, 29.2, 29.0, 24.7, 22.7, 14.1; MS (70 eV, EI) *m/z* (%): 260 (M (<sup>18</sup>O)<sub>2</sub><sup>+</sup>, 24.03), 258 (M (<sup>16</sup>O) (<sup>18</sup>O)<sup>+</sup>, 69.37), 256 (M (<sup>16</sup>O)<sub>2</sub><sup>+</sup>, 51.26).

The <sup>18</sup>O% incorporation of **2a**-<sup>18</sup>O was determined via the analysis of MS spectrum. Based on the known natural abundance of the stable isotopes of C, H, and O,

the naturally occurring isotopic  $^{18}\text{O}$  will also produce  $[\text{M}(^{18}\text{O})]^+$  peak. According to the natural abundance of  $^{18}\text{O}$ , the ratio of  $\text{C}_{16}\text{H}_{32}^{16}\text{O}_2:\text{C}_{16}\text{H}_{32}^{16}\text{O}^{18}\text{O}$  is 99.76:0.2. Thus, the intensity of  $[\text{M}(^{16}\text{O})(^{18}\text{O})](\text{C}_{16}\text{H}_{32}^{16}\text{O}^{18}\text{O})$  peak will be 0.2% of the intensity of the molecular peak  $[\text{M}(^{16}\text{O})_2](\text{C}_{16}\text{H}_{32}^{16}\text{O}_2)$ . According to the MS spectrum of  $\mathbf{2a}^{18}\text{O}$ , the relative abundance of  $\mathbf{2a}^{-(16}\text{O})_2$  256  $[\text{M}(^{16}\text{O})_2]$  and  $\mathbf{2a}^{-(16}\text{O})(^{18}\text{O})$  258  $[\text{M}(^{16}\text{O})(^{18}\text{O})]$  are 51.26 and 69.37, respectively. Since there was no detected contributions to the isotope peak intensities from background peaks or from impurities in the sample according to the MS spectrum of  $\mathbf{2a}$ , the incorporation of  $\mathbf{2a}^{-(16}\text{O})(^{18}\text{O})$  in  $\mathbf{2a}^{-(16}\text{O})(^{18}\text{O})$  and  $\mathbf{2a}^{-(16}\text{O})_2$  can be calculated as follows:  $([\text{M}(^{16}\text{O})(^{18}\text{O})]^+ - [\text{M}(^{16}\text{O})_2]^+ \times 0.2\%)/([\text{M}(^{16}\text{O})(^{18}\text{O})]^+ - [\text{M}(^{16}\text{O})_2]^+ \times 0.2\% + [\text{M}(^{16}\text{O})_2]^+) = (69.37 - 51.26 \times 0.2\%)/(69.37 - 51.26 \times 0.2\% + 51.26) = 57\%$ .

Besides, the ratio of  $\text{C}_{16}\text{H}_{32}^{16}\text{O}^{18}\text{O}:\text{C}_{16}\text{H}_{32}^{18}\text{O}_2$  is also 99.76:0.2. Thus, the intensity of  $[\text{M}(^{18}\text{O})_2](\text{C}_{16}\text{H}_{32}^{18}\text{O}_2)$  peak will be 0.2% of the intensity of the molecular peak  $[\text{M}(^{16}\text{O})(^{18}\text{O})](\text{C}_{16}\text{H}_{32}^{16}\text{O}^{18}\text{O})$ . According to the MS spectrum of  $\mathbf{2a}^{18}\text{O}$ , the relative abundance of  $\mathbf{2a}^{-(16}\text{O})(^{18}\text{O})$  258  $[\text{M}(^{16}\text{O})(^{18}\text{O})]$  and  $\mathbf{2a}^{-(18}\text{O})_2$  260  $[\text{M}(^{18}\text{O})_2]$  are 69.37 and 24.03, respectively. Since there was no detected contributions to the isotope peak intensities from background peaks or from impurities in the sample according to the MS spectrum of  $\mathbf{2a}$ , the incorporation of  $\mathbf{2a}^{-(18}\text{O})_2$  in  $\mathbf{2a}^{-(16}\text{O})(^{18}\text{O})$  and  $\mathbf{2a}^{-(18}\text{O})_2$  can be calculated as follows:  $([\text{M}(^{18}\text{O})_2]^+ - [\text{M}(^{16}\text{O})(^{18}\text{O})]^+ \times 0.2\%)/([\text{M}(^{18}\text{O})_2]^+ - [\text{M}(^{16}\text{O})(^{18}\text{O})]^+ \times 0.2\% + [\text{M}(^{16}\text{O})(^{18}\text{O})]^+) = (24.03 - 69.37 \times 0.2\%)/(24.03 - 69.37 \times 0.2\% + 69.37) = 26\%$ . Based on these results, the ratio of  $\text{C}_{16}\text{H}_{32}^{16}\text{O}_2:\text{C}_{16}\text{H}_{32}^{16}\text{O}^{18}\text{O}$  is 43%:57%, and the ratio of  $\text{C}_{16}\text{H}_{32}^{16}\text{O}^{18}\text{O}:\text{C}_{16}\text{H}_{32}^{18}\text{O}_2$  is 74%:26%.

To sum up, the ratio of  $\text{C}_{16}\text{H}_{32}^{16}\text{O}_2:\text{C}_{16}\text{H}_{32}^{16}\text{O}^{18}\text{O}:\text{C}_{16}\text{H}_{32}^{18}\text{O}_2$  is 43%:57%:(26×57/74)% = 36%:47%:17% (based on 100%).

### (9) Preparation of CuBr<sub>2</sub>•TEMPO (A)<sup>2</sup> (yyb-8-067)

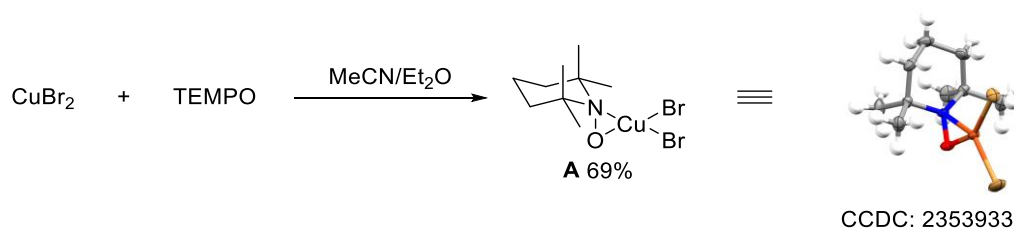

To a 4 mL glass vial were added CuBr<sub>2</sub> (223.7 mg, 1.0 mmol) and 2.0 mL of anhydrous MeCN. The resulting mixture was stirred at rt for 2 h before transferring to a solution of TEMPO (160.4 mg, 1.0 mmol) in 2.0 mL of anhydrous Et<sub>2</sub>O. The resulting mixture was stirred for an additional 2 h and concentrated to about 2 mL. Et<sub>2</sub>O (2.0 mL) was added to the mixture and the liquid was decanted from the precipitated solid. The solid was then dissolved in DCM (2 mL) and filtered through cotton. An additional 2.0 mL of Et<sub>2</sub>O were added and the recrystallization afforded dark crystals (264.1 mg, 69%).

### (10) Aerobic oxidation of alcohol **1a** with CuBr<sub>2</sub>•TEMPO (A) as catalyst

#### 1) CuBr<sub>2</sub>•TEMPO (A) as catalyst (yyb-8-093B)

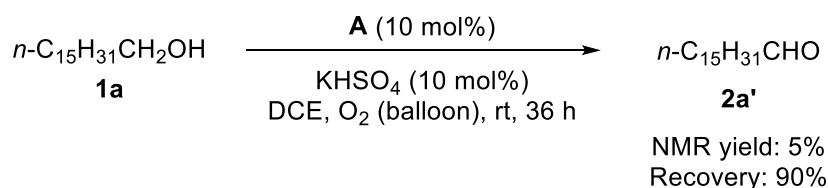

A Schlenk tube was degassed to remove the air inside and refilled with O<sub>2</sub> using an O<sub>2</sub> balloon for three times. Then **A** (19.4 mg, 0.05 mmol), KHSO<sub>4</sub> (7.0 mg, 0.05 mmol), **1a** (122.0 mg, 0.5 mmol), and DCE (2.0 mL) were added sequentially. The resulting mixture was stirred at rt for 36 h and filtrated through a short column of silica gel eluted with ethyl acetate (3 x 25 mL). After evaporation, dibromomethane (35.0 μL) was added as the internal standard for <sup>1</sup>H NMR analysis: 5% of aldehyde **2a'** was detected with 90% of alcohol **1a** recovered.

## 2) CuBr<sub>2</sub>•TEMPO (A) as catalyst with the addition of AgNO<sub>3</sub> (yyb-8-093A)

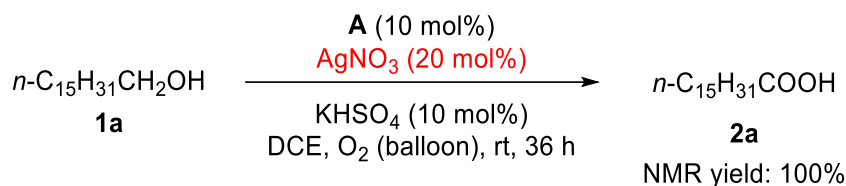

A Schlenk tube was degassed to remove the air inside and refilled with O<sub>2</sub> using an O<sub>2</sub> balloon for three times. Then AgNO<sub>3</sub> (16.8 mg, 0.1 mmol), **A** (18.9 mg, 0.05 mmol), KHSO<sub>4</sub> (6.7 mg, 0.05 mmol), **1a** (121.8 mg, 0.5 mmol), and DCE (2.0 mL) were added sequentially. The resulting mixture was stirred at rt for 36 h before filtrating through a short column of silica gel eluted with ethyl acetate (3 x 25 mL). After evaporation, dibromomethane (35.0 μL) was added as the internal standard for <sup>1</sup>H NMR analysis: 100% of carboxylic acid **2a** was detected.

## (11) Aerobic oxidation of alcohol **1a** with Cu(NO<sub>3</sub>)<sub>2</sub>•TEMPO or AgBr as catalyst

### 1) Preparation of filtrate (Cu(NO<sub>3</sub>)<sub>2</sub>•TEMPO) and precipitate (AgBr) from CuBr<sub>2</sub>•TEMPO (A) and AgNO<sub>3</sub> (yyb-9-013)

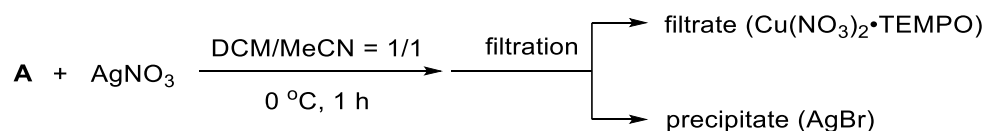

To a 20 mL glass vial were added **A** (378.2 mg, 1.0 mmol) and anhydrous DCM (5.0 mL). Then a solution of AgNO<sub>3</sub> (338.6 mg, 2.0 mmol) in 5.0 mL of anhydrous MeCN was added. The resulting mixture was stirred at 0 °C for 1 h and filtrated through a filter paper to afford the filtrate and the precipitate, respectively. The precipitate was identified as AgBr.

### 2) Aerobic oxidation of alcohol **1a** with filtrate (Cu(NO<sub>3</sub>)<sub>2</sub>•TEMPO) as catalyst (yyb-9-014A)

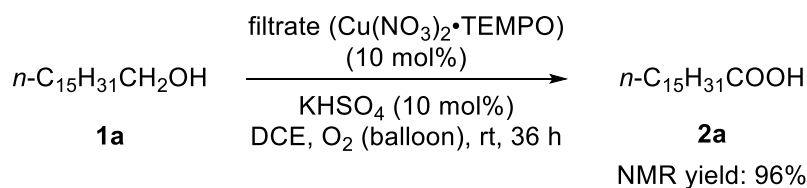

A Schlenk tube was degassed to remove the air inside and refilled with O<sub>2</sub> using



an O<sub>2</sub> balloon for three times. Then the evaporated filtrate (0.5 mL), KHSO<sub>4</sub> (6.5 mg, 0.05 mmol), **1a** (120.7 mg, 0.5 mmol), and DCE (2.0 mL) were added sequentially. The resulting mixture was stirred at rt for 36 h and filtrated through a short column of silica gel eluted with diethyl ether (3 x 25 mL). After evaporation, dibromomethane (35.0 μL) was added as the internal standard for <sup>1</sup>H NMR analysis: 96% of carboxylic acid **2a** was detected.

### 3) Aerobic oxidation of alcohol **1a** with precipitate (AgBr) as catalyst (yyb-8-197)

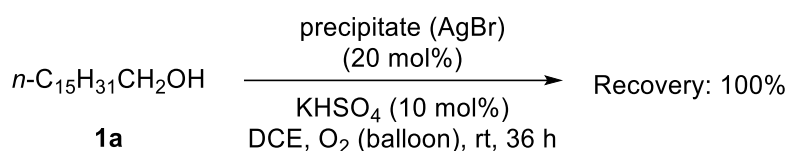

A Schlenk tube was degassed to remove the air inside and refilled with O<sub>2</sub> using an O<sub>2</sub> balloon for three times. Then the precipitate (7.2 mg, 0.04 mmol), KHSO<sub>4</sub> (2.7 mg, 0.02 mmol), **1a** (48.9 mg, 0.2 mmol), and DCE (0.8 mL) were added sequentially. The resulting mixture was stirred at rt for 36 h and filtrated through a short column of silica gel eluted with diethyl ether (3 x 15 mL). After evaporation, dibromomethane (35.0 μL) was added as the internal standard for <sup>1</sup>H NMR analysis: 100% recovery of alcohol **1a** was detected.

### (12) SAESI-MS studies for identification of Cu(NO<sub>3</sub>)<sub>2</sub>-TEMPO adduct (yyb-11-169)

To a 10 mL glass vial were added **A** (38.0 mg, 0.1 mmol) and DCM (4.0 mL). Then a solution of AgNO<sub>3</sub> (34.0 mg, 0.2 mmol) in 4.0 mL of MeCN was added. The resulting mixture was stirred at 0 °C for 1 h and then the supernatant was detected by solvent-assisted electrospray ionization mass spectrometry (SAESI-MS).<sup>3</sup>

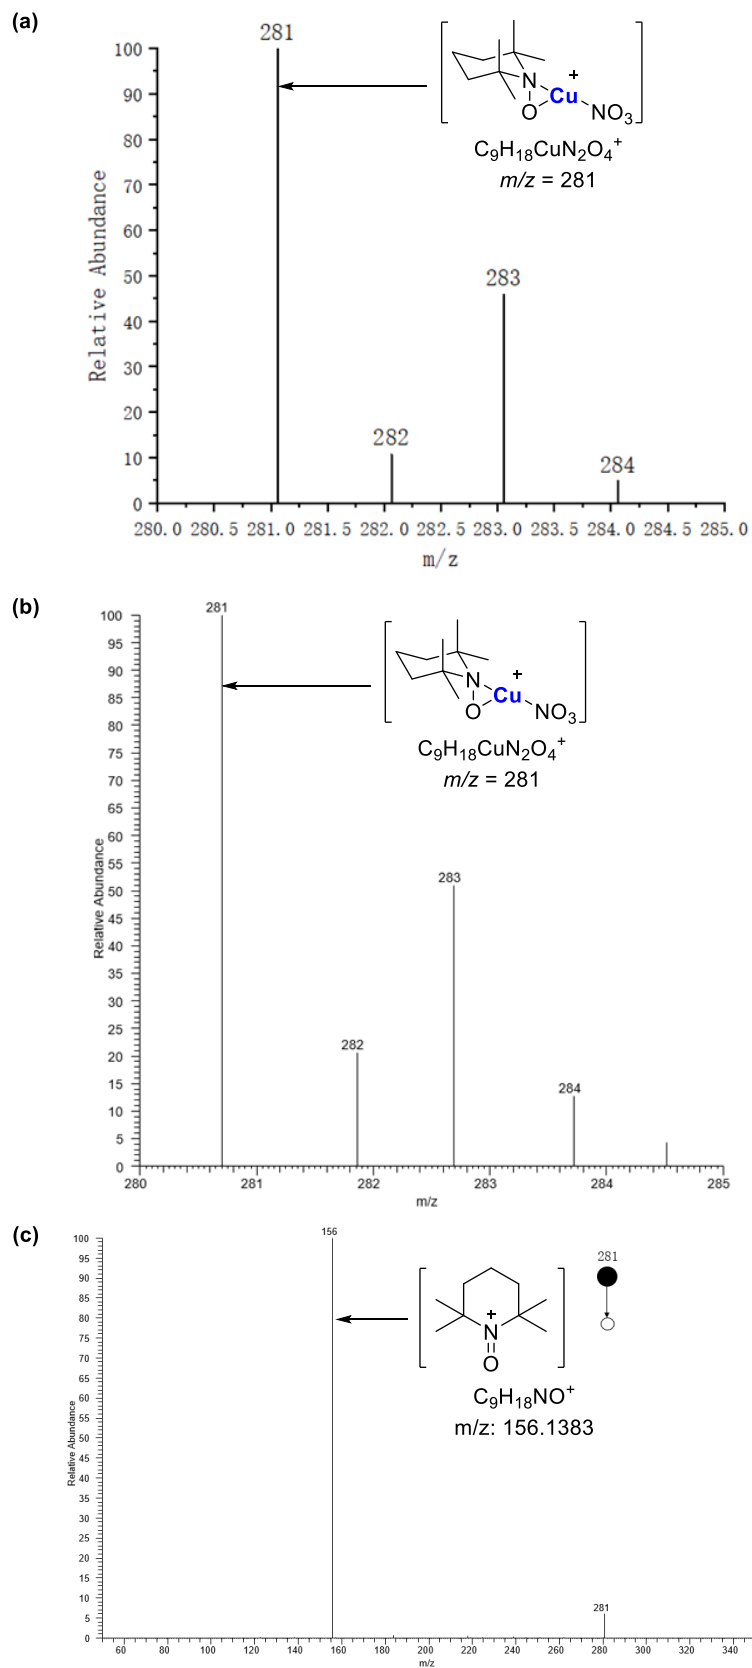

**Fig. S1. SAESI-MS studies.** (a) Theoretical isotopic distribution of  $[TEMPO\cdot Cu(NO_3)]^+$ . (b) Expanded SAESI-MS spectrum, showing the major signal from  $m/z$  280 to 285. (c) SAESI-MS/MS spectrum of  $[TEMPO\cdot Cu(NO_3)]^+$  at  $m/z$  281.

## Computational Method.

All the DFT calculations were performed with Gaussian 16 package.<sup>4</sup> The DFT method was employed using the (U)M06 functional.<sup>5</sup> The standard 6-31G(d)<sup>6</sup> basis sets were used for C, H, O and N atoms and LANL2DZ basis set<sup>7</sup> with effective core potential (ECP) for copper. Frequency analyses (at 298.15 K and 1 atm) were carried out to confirm each structure being a minimum (no imaginary frequency) or a transition state (only one imaginary frequency). Intrinsic reaction coordinate (IRC)<sup>8</sup> calculations were carried out to confirm the connection of the transition structures with their corresponding reactants and products. Single-point energies and solvent effects in DCE ( $\epsilon = 10.125$ ) were computed with (U)M06/SDD<sup>9</sup>-6-311+G(d,p) basis sets by using SMD<sup>10</sup> solvation model. The reported relative energies are the Gibbs free energies ( $\Delta G_{\text{sol}}$ ) in DCE.

### The calculations on the X-ray structure of CuBr<sub>2</sub>•TEMPO (A)

Single point energy calculations on the X-ray structure of CuBr<sub>2</sub>•TEMPO (**A**) shows that the closed-shell singlet structure of **A** is lower in electronic energy than its triplet state by 28.3 kcal/mol (Scheme S1a). Further optimization of **A** with closed-shell singlet state produces a similar  $\eta^2$ -TEMPO structure **I**. However, the optimization of **A** with triplet state converges to a  $\eta^1$ -TEMPO adduct **II**, which is less stable by 6.9 kcal/mol than **I** (Scheme S1b). Therefore, we considered that **A** is more inclined to be a Cu(III) species.

|         | single point energy <sup>a</sup>                                                                             | optimization <sup>b</sup>                                                                             |
|---------|--------------------------------------------------------------------------------------------------------------|-------------------------------------------------------------------------------------------------------|
| singlet | 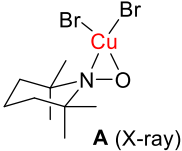<br><b>A</b> (X-ray) 0.0  | <br><b>I</b> 0.0  |
| triplet | <br><b>A</b> (X-ray) 28.3 | <br><b>II</b> 6.9 |

**Scheme S1.** a) The electronic energies (kcal/mol) calculated at (U)M06/SDD-6-311+G(d,p) level of theory with respect to the singlet state. b) The electronic energies (kcal/mol) calculated at (U)M06/SDD,6-311+G(d,p)/(U)M06/LANL2DZ,6-31G(d)

level of theory with respect to **I**.

### Two alternative possible aerobic oxidation mechanisms.

Other than the mechanism proposed in Scheme 4 of the main text, two possible pathways for this copper-catalyzed aerobic oxidation reaction have also been proposed. As shown in Scheme S2, in **Path S1**, TEMPO merely coordinates to  $\text{Cu}^{2+}$  to generate **B-1**, in which the oxidation state of copper has not been changed.<sup>11</sup> Subsequently **B-1** would react with the alcohol **1** to produce **B-2** upon releasing a proton. Then aldehyde **2'** is formed via a six-membered cyclic transition state **B-3** with the formation of  $\text{Cu}^+$  and TEMPOH. For **Path S2**,  $\text{TEMPO}^+$  would be formed from TEMPO in the presence of  $\text{Cu}^{2+}$  and  $\text{NO}_3^-$ .<sup>12</sup> As reported,<sup>13</sup> the alcohol could also be oxidized to aldehyde **2'** by  $\text{TEMPO}^+$  with the formation of TEMPOH, which could be oxidized back to TEMPO by  $\text{Cu}^{2+}$  (Scheme S2).

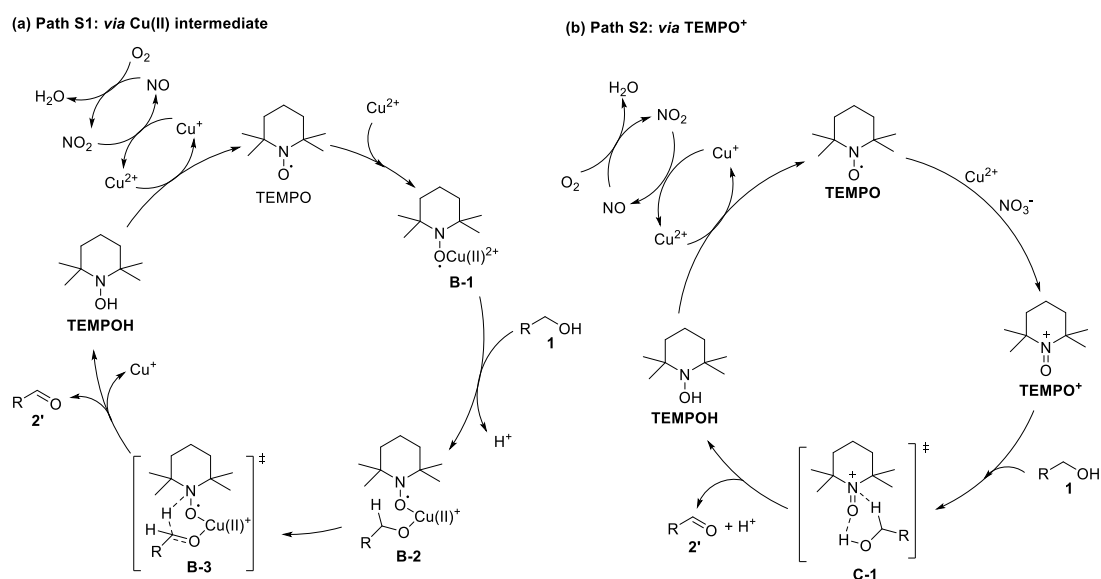

**Scheme S2.** The other two possible mechanisms.

For the pathway showed in Scheme 4 of the main text, TEMPO couples with Cu(II) to generate the **A-1** type Cu species **int0**, which is with a closed-shell singlet electronic structure. As to **Path S1** in Scheme S2, the interaction of TEMPO to Cu(II) merely results in the formation of the coordination complex **B-1** type triplet Cu species **<sup>3</sup>int1**. We conducted Mulliken atomic spin density analysis (Scheme S3), which shows that **<sup>3</sup>int1** has one electron distributes on TEMPO and the other electron distributes on Cu

moiety, indicating that only coordination takes place between TEMPO and Cu(II). It is noteworthy that such adduct of M-TEMPO has been isolated when M is Fe or Al.<sup>14</sup>

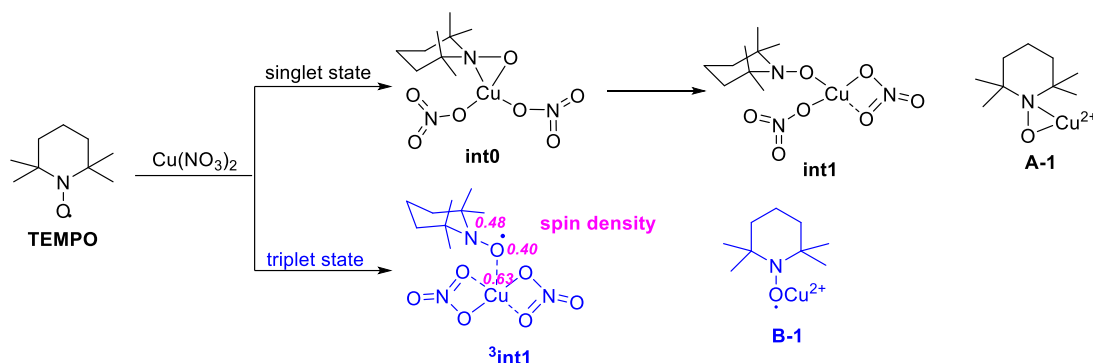

**Scheme S3.** Mulliken atomic spin density analysis.

DFT calculations were performed to evaluate these reaction pathways. The free energy profile of **Path S1** are presented in Fig. S2a with blue line. Initial coupling of TEMPO with Cu(NO<sub>3</sub>)<sub>2</sub> provides **A-1** type  $\eta^2$ -TEMPO adduct species **int0** with closed-shell singlet electronic structure, or **B-1** type triplet Cu-TEMPO intermediate **<sup>3</sup>int1**.<sup>11</sup> Mulliken atomic spin density analysis shows that **<sup>3</sup>int1** has one electron distributes on TEMPO and the other electron distributes on Cu moiety, indicating that only coordination takes place between TEMPO and Cu(II). The isomerization of **int0** yields a more stable  $\eta^1$ -TEMPO adduct **int1**, which is more stable by 1.7 kcal/mol than **<sup>3</sup>int1**. For the singlet profile from **int1** (black line in Fig. S2a, the pathway showed in the main text), subsequent coordination with alcohol yields intermediate **int2**. Then displacement of one of the nitrate ion by alkoxide ligand occurs uphill energetically (+21.3 kcal/mol, **int4** with respect to **int1**) to produce the **A-2** type Cu-alkoxide species **int4**, accompany with the release of nitric acid. Subsequently, a six-membered ring transition structure **TS1** is located for the migration of hydrogen from the alkoxide to the nitrogen atom of TEMPO, resulting in the formation of aldehyde, TEMPOH and CuNO<sub>3</sub>. Notably, the activation barrier for hydrogen shift is very low (almost no barrier) from **int4**, while the overall free energy of this singlet profile for oxidation of alcohol to aldehyde is 21.3 kcal/mol (**int4** with respect to **int1**, black line in Fig. S2a). On the other hand, the triplet profile (blue line in Fig. S2a) proceeds in a similar pathway. The triplet intermediates **<sup>3</sup>int2**-**<sup>3</sup>int4** feature lower free energies by about 2 kcal/mol than their corresponding singlet structures, respectively. It is noteworthy that **TS1** is

more stable by 18.6 kcal/mol than its corresponding  $^3\text{TS1}$ , indicating the preference of the singlet pathway (black line in Fig. S2a, the pathway showed in the main text).

Furthermore, the possibility of the  $\text{TEMPO}^+$  participated oxidation mechanism (**Path S2**, Scheme S2b) was also evaluated by DFT calculations (Fig. S2b). The oxidation of alcohol to aldehyde with  $\text{TEMPO}^+$  proceeds via a **C-1** type six-membered cyclic transition structure **TS4** or **TS4'**, which involves the migrations of two hydrogens from alcohol to  $\text{TEMPO}^+$ . **TS4** and **TS4'** feature similar free energy barriers at 27.4 and 27.6 kcal/mol, respectively. The subsequent reaction of aldehyde with water with the aid of  $\text{HNO}_3$  provides aldehyde hydrate **int7**, which would be further oxidized to acetic acid by  $\text{TEMPO}^+$  via six-membered cyclic transition structure **TS5** or **TS5'**, with a similar activation free energy of 24.7 and 26.0 kcal/mol, respectively. Due to the higher free energy barrier of **TS4** (27.4 kcal/mol) than **TS1** (17.8 kcal/mol), the  $\text{TEMPO}^+$  participated pathway is less favorable.

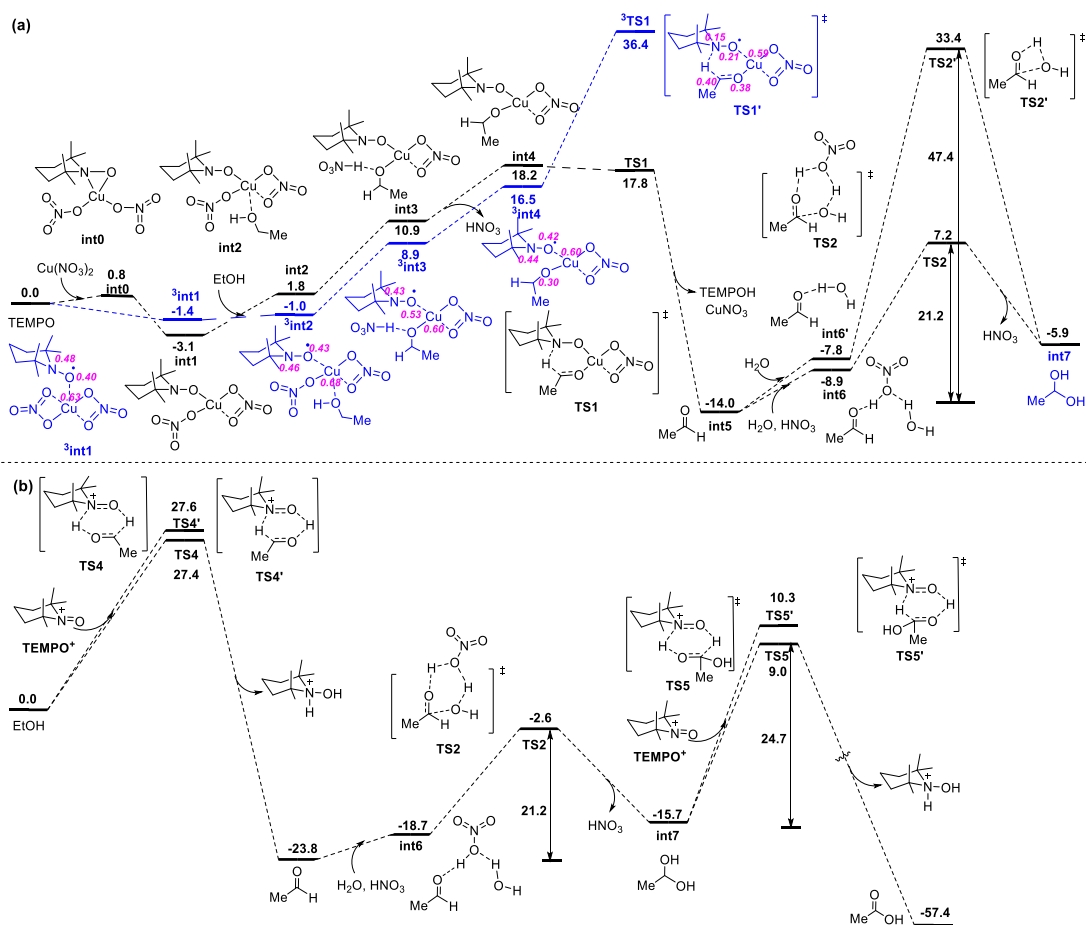

**Fig. S2.** (a) Free energy profiles ( $\Delta G_{\text{sol}}$  in kcal/mol) for the copper-catalyzed oxidation

of alcohol to aldehyde. (The pink numbers are spin densities for the structures in the triplet profile.) (b) Free energy profiles ( $\Delta G_{\text{sol}}$  in kcal/mol) for the TEMPO<sup>+</sup>-catalyzed oxidation of alcohol to acetic acid.

### Energies of intermediates and transition states

**Table S3.** Electronic energies ( $E_{\text{elec}}$ ), Gibbs free energies ( $G_{298}$ ), thermal correction to Gibbs free energy ( $cor G_{\text{gas}}$ ), solvation energies ( $E_{\text{sol}}$ ), solvation free energies ( $G_{\text{sol}}$ ) in THF ( $\epsilon = 7.43$ ) for all stationary points of the process.

| species                               | $E_{\text{elec}}$<br>(a.u.) | $G_{298}$<br>(a.u.) | $cor G_{\text{gas}}$<br>(a.u.) | $E_{\text{sol}}$<br>(a.u.) | $G_{\text{sol}}$<br>(a.u.) |
|---------------------------------------|-----------------------------|---------------------|--------------------------------|----------------------------|----------------------------|
| <b>Cu(NO3)2</b>                       | -756.5464367                | -756.547944         | -0.001507                      | -757.9176976               | -757.9192046               |
| <b>TEMPO</b>                          | -483.370202                 | -483.145174         | 0.225028                       | -483.5077736               | -483.2827456               |
| <b>int0</b>                           | -1239.923176                | -1239.67495         | 0.248224                       | -1241.44894                | -1241.2007                 |
| <b>int1</b>                           | -1239.932756                | -1239.686498        | 0.246258                       | -1241.453228               | -1241.20697                |
| <b>EtOH</b>                           | -154.9300104                | -154.875403         | 0.054607                       | -154.9907838               | -154.9361768               |
| <b>int2</b>                           | -1394.88472                 | -1394.564345        | 0.320375                       | -1396.455699               | -1396.135324               |
| <b>int3</b>                           | -1394.868188                | -1394.547629        | 0.32056                        | -1396.441255               | -1396.120695               |
| <b>HNO<sub>3</sub></b>                | -280.7564902                | -280.754986         | 0.001504                       | -280.8474382               | -280.84593                 |
| <b>int4</b>                           | -1114.078685                | -1113.777648        | 0.301038                       | -1115.564195               | -1115.263157               |
| <b>TS1</b>                            | -1114.0761                  | -1113.777489        | 0.29861                        | -1115.562498               | -1115.263888               |
| <b><sup>3</sup>int1</b>               | -1239.937964                | -1239.69326         | 0.244705                       | -1241.448959               | -1241.2043                 |
| <b><sup>3</sup>int2</b>               | -1394.889387                | -1394.56991         | 0.319475                       | -1396.459202               | -1396.1397                 |
| <b><sup>3</sup>int3</b>               | -1394.868496                | -1394.54956         | 0.318935                       | -1396.442871               | -1396.1239                 |
| <b><sup>3</sup>int4</b>               | -1114.082229                | -1113.78701         | 0.295223                       | -1115.561201               | -1115.266                  |
| <b><sup>3</sup>TS1</b>                | -1114.043243                | -1113.74813         | 0.295114                       | -1115.529377               | -1115.2343                 |
| <b>CuNO3</b>                          | -476.356381                 | -476.369391         | -0.01301                       | -477.667158                | -477.68017                 |
| <b>TEMPOH</b>                         | -483.9763747                | -483.73879          | 0.237585                       | -484.1210405               | -483.88346                 |
| <b>int5</b>                           | -153.7288757                | -153.69801          | 0.030866                       | -153.7818048               | -153.75094                 |
| <b>H<sub>2</sub>O_HNO<sub>3</sub></b> | -357.15589                  | -357.133152         | 0.022738                       | -357.286185                | -357.26345                 |
| <b>int6</b>                           | -510.893664                 | -510.826584         | 0.067079                       | -511.073384                | -511.00631                 |
| <b>TS2</b>                            | -510.866689                 | -510.79157          | 0.075118                       | -511.055704                | -510.98059                 |
| <b>int6'</b>                          | -230.1188955                | -230.067587         | 0.051309                       | -230.2144776               | -230.16317                 |
| <b>TS2'</b>                           | -230.0556745                | -230.004181         | 0.051494                       | -230.1490077               | -230.09751                 |
| <b>int7</b>                           | -230.1256546                | -230.068052         | 0.057603                       | -230.2177603               | -230.16016                 |
| <b>int8</b>                           | -1470.088555                | -1469.76297         | 0.325587                       | -1471.688785               | -1471.3632                 |
| <b>int9</b>                           | -1470.074645                | -1469.74967         | 0.324977                       | -1471.686394               | -1471.3614                 |
| <b>int10</b>                          | -1189.285106                | -1188.98137         | 0.303739                       | -1190.79789                | -1190.4942                 |
| <b>TS3</b>                            | -1189.276304                | -1188.97634         | 0.299963                       | -1190.794511               | -1190.4945                 |

|                           |              |             |          |              |            |
|---------------------------|--------------|-------------|----------|--------------|------------|
| <b>CH<sub>3</sub>COOH</b> | -228.959398  | -228.924098 | 0.035299 | -229.03962   | -229.00432 |
| <b>TEMPO+</b>             | -483.1191696 | -482.891584 | 0.227586 | -483.3190082 | -483.09142 |
| <b>TS4</b>                | -638.029972  | -637.730103 | 0.299869 | -638.283848  | -637.98398 |
| <b>TS4'</b>               | -638.0347535 | -637.732484 | 0.30227  | -638.2859606 | -637.98369 |
| <b>TS5</b>                | -713.238016  | -712.935551 | 0.302464 | -713.514604  | -713.21214 |
| <b>TS5'</b>               | -713.239157  | -712.933738 | 0.305419 | -713.515583  | -713.21016 |



## Cartesian coordinates for the optimized structures

### Cu(NO<sub>3</sub>)<sub>2</sub>

|    |             |             |             |
|----|-------------|-------------|-------------|
| Cu | 0.00000000  | 0.00006900  | 0.00001700  |
| N  | 2.37607400  | 0.00000900  | 0.00019700  |
| O  | 1.65940000  | 1.06669900  | -0.00004900 |
| O  | 1.65871600  | -1.06637700 | -0.00005000 |
| O  | -1.65884500 | 1.06638600  | 0.00002300  |
| N  | -2.37607500 | -0.00007100 | -0.00013500 |
| O  | 3.56460700  | -0.00044300 | -0.00012200 |
| O  | -3.56460600 | 0.00022700  | 0.00006200  |
| O  | -1.65927300 | -1.06668700 | 0.00002200  |

### TEMPO

|   |             |             |             |
|---|-------------|-------------|-------------|
| H | 0.00000000  | 2.18831600  | 1.09462900  |
| C | 0.00000000  | 2.11345800  | -0.00346900 |
| C | 1.23718000  | 1.38218800  | -0.49626900 |
| C | -1.23718100 | 1.38218700  | -0.49626900 |
| H | -0.00000100 | 3.14651300  | -0.37654600 |
| H | 2.15898300  | 1.89347100  | -0.18023200 |
| H | 1.23450300  | 1.39250000  | -1.59898700 |
| H | -2.15898300 | 1.89347000  | -0.18023200 |
| H | -1.23450300 | 1.39249900  | -1.59898700 |
| N | 0.00000000  | -0.74227800 | -0.22275900 |
| O | 0.00000100  | -2.01000600 | -0.09490900 |
| C | -1.31740700 | -0.07050500 | -0.02456500 |
| C | 1.31740700  | -0.07050500 | -0.02456500 |
| C | 2.33988600  | -0.82228000 | -0.86748000 |
| H | 2.44938600  | -1.85493900 | -0.52297600 |
| H | 2.03224000  | -0.84291600 | -1.92084400 |
| H | 3.31253900  | -0.31698200 | -0.79869900 |
| C | 1.71551600  | -0.16505200 | 1.44982200  |
| H | 1.61224200  | -1.20186100 | 1.79241200  |
| H | 2.76336100  | 0.14029400  | 1.57444000  |
| H | 1.10238300  | 0.47454400  | 2.09649500  |
| C | -1.71551600 | -0.16505200 | 1.44982200  |
| H | -1.10238300 | 0.47454400  | 2.09649500  |
| H | -2.76336100 | 0.14029300  | 1.57444000  |
| H | -1.61224200 | -1.20186200 | 1.79241200  |
| C | -2.33988700 | -0.82228000 | -0.86748000 |
| H | -2.03224000 | -0.84291700 | -1.92084400 |
| H | -2.44938600 | -1.85494000 | -0.52297500 |
| H | -3.31253900 | -0.31698200 | -0.79870000 |

**Int0**

|    |             |             |             |
|----|-------------|-------------|-------------|
| Cu | -0.75390000 | -0.18977500 | -0.31235100 |
| O  | 0.37942600  | -1.74474500 | -0.01693500 |
| N  | 1.11846700  | -0.69667800 | 0.03523200  |
| C  | 1.57557800  | -0.26785600 | 1.44167600  |
| C  | 1.97113000  | -0.43303300 | -1.22491200 |
| C  | 2.17016500  | 1.13358300  | 1.33129600  |
| C  | 2.54911100  | 0.97699500  | -1.12710500 |
| H  | 2.61108000  | 1.37131000  | 2.31023000  |
| H  | 3.27528500  | 1.08238700  | -1.94645600 |
| H  | 1.34757500  | 1.84826900  | 1.17368600  |
| H  | 1.74180600  | 1.69886600  | -1.31868600 |
| C  | 3.19083400  | 1.29069400  | 0.21544600  |
| H  | 3.56237200  | 2.32295400  | 0.20584900  |
| H  | 4.07193700  | 0.65592700  | 0.39386400  |
| C  | 0.36648600  | -0.26728200 | 2.36434500  |
| C  | 1.07603400  | -0.56341300 | -2.45168200 |
| H  | -0.41681300 | 0.43210700  | 2.03910600  |
| H  | 0.28111100  | 0.19448400  | -2.48084200 |
| H  | 1.70002800  | -0.39115000 | -3.33748600 |
| H  | -0.07393300 | -1.26348200 | 2.47413500  |
| H  | 0.63504900  | -1.56261900 | -2.53903500 |
| C  | 2.57929400  | -1.30710200 | 1.94467100  |
| C  | 3.04638300  | -1.51938600 | -1.28781500 |
| H  | 2.18567400  | -2.32201100 | 1.81129400  |
| H  | 2.60129200  | -2.51596400 | -1.18025500 |
| H  | 3.52029000  | -1.46450500 | -2.27591900 |
| H  | 3.56096800  | -1.23547600 | 1.46778800  |
| H  | 3.83505700  | -1.39902700 | -0.53995300 |
| H  | 0.70584700  | 0.07221200  | 3.35113100  |
| H  | 2.72281400  | -1.13979500 | 3.01930600  |
| O  | -0.64578400 | 1.65806200  | -0.77773300 |
| O  | -2.46688300 | -0.69087000 | -0.96210200 |
| N  | -1.43904700 | 2.37908600  | -0.00132300 |
| O  | -1.55890800 | 3.54688000  | -0.28585400 |
| O  | -1.96540700 | 1.80204300  | 0.94575300  |
| N  | -3.08424500 | -1.28293400 | 0.03534900  |
| O  | -4.20976400 | -1.67462700 | -0.15232900 |
| O  | -2.44776200 | -1.38881100 | 1.08796100  |

**int1**

|    |             |             |            |
|----|-------------|-------------|------------|
| Cu | -1.53799300 | 0.11528300  | 0.01360300 |
| O  | -0.59077500 | 1.37385800  | 1.11457000 |
| H  | 4.34038300  | -0.56234100 | 0.86728200 |

|   |             |             |             |
|---|-------------|-------------|-------------|
| C | 4.06292700  | -1.08029100 | -0.06220300 |
| C | 2.99866400  | -2.13267600 | 0.20023100  |
| C | 3.57874200  | -0.09082000 | -1.10970900 |
| H | 4.97897000  | -1.57130900 | -0.41580000 |
| H | 3.31264300  | -2.83223200 | 0.98865700  |
| H | 2.85094800  | -2.73022700 | -0.71386200 |
| H | 4.33714400  | 0.67844400  | -1.31500800 |
| H | 3.39493900  | -0.62023900 | -2.05875300 |
| N | 1.30663600  | -0.43727500 | -0.32926800 |
| O | 0.19326800  | -0.44919200 | -0.87086200 |
| C | 2.28845100  | 0.64651600  | -0.70512100 |
| C | 1.63144500  | -1.56473100 | 0.61624300  |
| C | 0.56384500  | -2.63750300 | 0.47060400  |
| H | -0.40953500 | -2.31611500 | 0.85956700  |
| H | 0.42483000  | -2.94321000 | -0.57252500 |
| H | 0.88675600  | -3.51077500 | 1.05115500  |
| C | 1.62616400  | -1.03440600 | 2.05444400  |
| H | 0.73732900  | -0.41922900 | 2.24512900  |
| H | 1.60329700  | -1.89737800 | 2.73221000  |
| H | 2.51233100  | -0.44138300 | 2.29851400  |
| C | 2.55845600  | 1.61119000  | 0.45540400  |
| H | 3.18582300  | 1.17589100  | 1.23856700  |
| H | 3.10238200  | 2.47024000  | 0.04229900  |
| H | 1.63630700  | 1.98029400  | 0.91366400  |
| C | 1.71395800  | 1.40826200  | -1.88695100 |
| H | 1.47404500  | 0.74026100  | -2.72254800 |
| H | 0.80658300  | 1.96571100  | -1.62414200 |
| H | 2.47055900  | 2.12675300  | -2.22475200 |
| O | -3.59690800 | -0.21076000 | 0.55425300  |
| N | -3.61188400 | -1.15651900 | -0.28080400 |
| O | -4.57027100 | -1.84356100 | -0.50967900 |
| O | -2.48619300 | -1.34468300 | -0.88840800 |
| N | -0.76140300 | 2.51769400  | 0.50054300  |
| O | -1.44378000 | 2.49139900  | -0.53244400 |
| O | -0.21950200 | 3.50082500  | 0.95568700  |

#### **EtOH**

|   |             |             |             |
|---|-------------|-------------|-------------|
| C | 1.21120600  | -0.21978500 | -0.00000600 |
| H | 1.27249600  | -0.86158400 | -0.88680900 |
| H | 1.27251100  | -0.86160000 | 0.88678500  |
| H | 2.07080800  | 0.46075600  | -0.00000500 |
| C | -0.08837000 | 0.54604100  | 0.00000600  |
| H | -0.13855200 | 1.20243500  | 0.88771200  |
| H | -0.13856400 | 1.20245100  | -0.88768800 |

|   |             |             |             |
|---|-------------|-------------|-------------|
| O | -1.13750100 | -0.39758900 | 0.00001200  |
| H | -1.97571200 | 0.08071700  | -0.00008900 |

**int2**

|    |             |             |             |
|----|-------------|-------------|-------------|
| Cu | -1.13219800 | 0.37837200  | -0.39659000 |
| O  | -0.35456400 | 1.24257300  | 1.14559800  |
| H  | 4.45142800  | -1.13061800 | 1.10515800  |
| C  | 4.34925400  | -1.28081900 | 0.02068100  |
| C  | 3.22061200  | -2.24951500 | -0.28868600 |
| C  | 4.11427200  | 0.04177900  | -0.68990200 |
| H  | 5.30161400  | -1.71349400 | -0.31276400 |
| H  | 3.35048600  | -3.20078300 | 0.24777100  |
| H  | 3.23573800  | -2.48821700 | -1.36459400 |
| H  | 4.92158200  | 0.75862500  | -0.48119900 |
| H  | 4.10727600  | -0.12321700 | -1.77967200 |
| N  | 1.71777700  | -0.31899100 | -0.47851800 |
| O  | 0.72806500  | -0.03329100 | -1.15679500 |
| C  | 2.79431100  | 0.72629300  | -0.29203500 |
| C  | 1.81668100  | -1.72678000 | 0.05664600  |
| C  | 0.76044400  | -2.57917800 | -0.62892400 |
| H  | -0.25032700 | -2.33548400 | -0.28166600 |
| H  | 0.79600800  | -2.48031100 | -1.71999300 |
| H  | 0.96238400  | -3.62596300 | -0.36762100 |
| C  | 1.54583100  | -1.70559700 | 1.56484900  |
| H  | 0.64138200  | -1.12500200 | 1.78529500  |
| H  | 1.37317800  | -2.74046700 | 1.88723900  |
| H  | 2.37796900  | -1.30281900 | 2.14999800  |
| C  | 2.85449200  | 1.22742600  | 1.15540400  |
| H  | 3.31056600  | 0.50565100  | 1.83925500  |
| H  | 3.48303400  | 2.12711100  | 1.16121000  |
| H  | 1.86647200  | 1.49954800  | 1.53858200  |
| C  | 2.49023700  | 1.88202300  | -1.22983100 |
| H  | 2.39352200  | 1.54559200  | -2.26890400 |
| H  | 1.57127900  | 2.41507600  | -0.95880800 |
| H  | 3.32573300  | 2.59018600  | -1.17155700 |
| O  | -3.43664500 | 0.14194400  | -0.68687000 |
| N  | -3.12004500 | -0.26799300 | -1.83874800 |
| O  | -3.91944800 | -0.57626700 | -2.68469000 |
| O  | -1.85347200 | -0.35218700 | -2.06113900 |
| N  | -0.33488700 | 2.51912200  | 0.86005300  |
| O  | -0.83545900 | 2.85617900  | -0.21879700 |
| O  | 0.19487600  | 3.27359300  | 1.64996800  |
| O  | -1.93813600 | -1.37923800 | 1.10740100  |
| H  | -2.70368400 | -1.31850000 | 0.50677700  |

|   |             |             |            |
|---|-------------|-------------|------------|
| C | -2.38061100 | -0.81497000 | 2.34427300 |
| H | -2.56522400 | 0.26377300  | 2.22058200 |
| H | -1.53856500 | -0.91933300 | 3.03997200 |
| C | -3.61417800 | -1.51955300 | 2.85654800 |
| H | -3.92809000 | -1.10802100 | 3.82369700 |
| H | -4.45001600 | -1.39007500 | 2.15419500 |
| H | -3.42972400 | -2.59412100 | 2.97712600 |

**int3**

|    |             |             |             |
|----|-------------|-------------|-------------|
| Cu | -1.42451900 | -0.58021000 | -0.16669200 |
| O  | -0.85504800 | 2.59153000  | -0.56785100 |
| H  | 4.59979100  | -0.38198000 | 0.42135500  |
| C  | 4.26829900  | -1.08926100 | -0.35280100 |
| C  | 3.37314000  | -2.16240900 | 0.24526600  |
| C  | 3.54912800  | -0.36277000 | -1.47794100 |
| H  | 5.18325200  | -1.55338900 | -0.74406900 |
| H  | 3.86944700  | -2.67846000 | 1.08037400  |
| H  | 3.15756800  | -2.92541200 | -0.52046500 |
| H  | 4.17481900  | 0.43611200  | -1.90228800 |
| H  | 3.33809100  | -1.07257600 | -2.29434000 |
| N  | 1.44385700  | -0.80249200 | -0.34574500 |
| O  | 0.36510500  | -1.17079000 | -0.83617300 |
| C  | 2.21638100  | 0.28503900  | -1.05165000 |
| C  | 2.02878800  | -1.62572400 | 0.77346900  |
| C  | 1.08475900  | -2.78021200 | 1.06319100  |
| H  | 0.13452500  | -2.42906300 | 1.48494300  |
| H  | 0.86909700  | -3.37475800 | 0.16875500  |
| H  | 1.56419200  | -3.43070700 | 1.80525700  |
| C  | 2.20727500  | -0.78695400 | 2.04096400  |
| H  | 1.29373600  | -0.21716800 | 2.24390500  |
| H  | 2.39888600  | -1.47343600 | 2.87595100  |
| H  | 3.04986900  | -0.09170300 | 1.98804900  |
| C  | 2.44581300  | 1.49516400  | -0.14094900 |
| H  | 3.28243500  | 1.36195300  | 0.55192300  |
| H  | 2.68578000  | 2.35740200  | -0.77679200 |
| H  | 1.54942100  | 1.73368400  | 0.44033300  |
| C  | 1.42850000  | 0.70931900  | -2.27878500 |
| H  | 1.18585300  | -0.13949300 | -2.92734900 |
| H  | 0.49931300  | 1.22616300  | -2.00913200 |
| H  | 2.04881000  | 1.41349000  | -2.84704400 |
| O  | -3.55357700 | -0.60659700 | 0.00891100  |
| N  | -3.57195000 | -1.47461300 | -0.91455900 |
| O  | -4.57570000 | -1.97202000 | -1.34597000 |
| O  | -2.40587000 | -1.79364900 | -1.36394900 |

|   |             |             |             |
|---|-------------|-------------|-------------|
| N | -0.35448100 | 3.74522400  | -0.06439100 |
| O | -0.46646600 | 4.70706000  | -0.77598100 |
| O | 0.15507000  | 3.68593000  | 1.03919300  |
| O | -0.55070200 | 0.59122300  | 0.99042400  |
| H | -0.66611800 | 1.85060500  | 0.13342800  |
| C | -1.29349600 | 0.94628900  | 2.13847300  |
| H | -2.20346300 | 1.50763500  | 1.85062200  |
| H | -0.67246800 | 1.64266600  | 2.72826100  |
| C | -1.67754400 | -0.25671700 | 2.97358700  |
| H | -2.22415600 | 0.04770600  | 3.87516600  |
| H | -2.33153300 | -0.93381100 | 2.40399100  |
| H | -0.78683400 | -0.81827800 | 3.29033500  |

### **HNO<sub>3</sub>**

|   |             |             |             |
|---|-------------|-------------|-------------|
| N | -0.14298100 | 0.04133900  | -0.00011900 |
| O | 1.09059200  | -0.59748800 | -0.00004500 |
| O | -1.07457600 | -0.70560100 | 0.00007000  |
| O | -0.10647100 | 1.24864500  | 0.00001400  |
| H | 1.72450400  | 0.14617700  | 0.00051700  |

### **int4**

|    |             |             |             |
|----|-------------|-------------|-------------|
| Cu | -1.60433600 | 0.24786900  | -0.34508100 |
| O  | -1.10754800 | 1.99037000  | -0.53731100 |
| H  | 4.34387700  | -1.10327000 | 0.27299600  |
| C  | 3.53724200  | -1.74451800 | -0.11358800 |
| C  | 2.45534800  | -1.94627300 | 0.93958600  |
| C  | 2.95158100  | -1.16424900 | -1.39481100 |
| H  | 4.01062800  | -2.71027000 | -0.33596300 |
| H  | 2.87851000  | -2.35085600 | 1.87137600  |
| H  | 1.72040800  | -2.68040000 | 0.57245700  |
| H  | 3.73357100  | -1.00230700 | -2.15205500 |
| H  | 2.23392600  | -1.88348500 | -1.82062900 |
| N  | 1.22539300  | -0.09736100 | -0.05389900 |
| O  | 0.13465300  | -0.61762500 | -0.45430400 |
| C  | -0.13212800 | 2.47707700  | 0.25482500  |
| H  | 0.42483200  | 3.28516100  | -0.26626900 |
| C  | 2.20729400  | 0.16767900  | -1.18505400 |
| C  | 1.68982500  | -0.65561000 | 1.28275600  |
| C  | 0.45328700  | -0.96929300 | 2.11342300  |
| H  | -0.10366600 | -0.04955400 | 2.34590300  |
| H  | -0.22558100 | -1.66883900 | 1.61648400  |
| H  | 0.77806400  | -1.41044400 | 3.06408200  |
| C  | 2.55469300  | 0.32599100  | 2.06584700  |
| H  | 2.07700700  | 1.31130400  | 2.14150400  |

|   |             |             |             |
|---|-------------|-------------|-------------|
| H | 2.66852600  | -0.06384200 | 3.08537500  |
| H | 3.56214600  | 0.45758700  | 1.66371300  |
| C | 3.17021300  | 1.31013400  | -0.87686600 |
| H | 3.92238600  | 1.07039700  | -0.12172700 |
| H | 3.71320600  | 1.55197100  | -1.79923800 |
| H | 2.63584600  | 2.21468500  | -0.56293600 |
| C | 1.40265300  | 0.53360300  | -2.42548900 |
| H | 0.75550600  | -0.28650000 | -2.74958600 |
| H | 0.77143200  | 1.41366000  | -2.24679000 |
| H | 2.10455100  | 0.76191700  | -3.23719500 |
| C | -0.60222200 | 2.92955600  | 1.62747000  |
| H | 0.22607500  | 3.31194000  | 2.24003600  |
| H | -1.07909300 | 2.09596600  | 2.16361600  |
| H | -1.35299600 | 3.72229600  | 1.52275500  |
| O | -3.79283300 | 0.17201700  | -0.26518000 |
| N | -3.68602000 | -1.07257000 | -0.09522200 |
| O | -4.62018100 | -1.81803700 | 0.04954100  |
| O | -2.47072600 | -1.50763600 | -0.08550500 |
| H | 0.67734200  | 1.67690400  | 0.39674400  |

### TS1

|    |             |             |             |
|----|-------------|-------------|-------------|
| Cu | -1.63475100 | 0.21230700  | -0.27088600 |
| O  | -1.04208500 | 1.94811800  | -0.56538200 |
| H  | 4.28073900  | -1.29200800 | 0.14941200  |
| C  | 3.38825800  | -1.89667000 | -0.07305800 |
| C  | 2.40706000  | -1.85835300 | 1.09217000  |
| C  | 2.72583200  | -1.43086600 | -1.36345300 |
| H  | 3.75543800  | -2.92319900 | -0.20397000 |
| H  | 2.89760500  | -2.16297900 | 2.02889200  |
| H  | 1.59229200  | -2.57461400 | 0.90655700  |
| H  | 3.44446100  | -1.42872900 | -2.19681300 |
| H  | 1.92223100  | -2.13345100 | -1.63195500 |
| N  | 1.19172800  | -0.05597600 | -0.03852100 |
| O  | 0.09984500  | -0.69414300 | -0.28874500 |
| C  | 0.05481500  | 2.38005800  | -0.00160100 |
| H  | 0.79978300  | 1.36390600  | 0.12801100  |
| H  | 0.70890200  | 2.96497700  | -0.68477600 |
| C  | 2.10983700  | -0.02847900 | -1.27113300 |
| C  | 1.77306100  | -0.47945100 | 1.31907800  |
| C  | 0.61514800  | -0.58696300 | 2.30221800  |
| H  | 0.15635900  | 0.39458100  | 2.48656700  |
| H  | -0.15922300 | -1.28029200 | 1.96175800  |
| H  | 1.01007800  | -0.94965900 | 3.25987900  |
| C  | 2.77504200  | 0.53347200  | 1.86185800  |

|   |             |             |             |
|---|-------------|-------------|-------------|
| H | 2.40387600  | 1.56264100  | 1.77260700  |
| H | 2.91663000  | 0.33214500  | 2.93111800  |
| H | 3.76274800  | 0.48019500  | 1.39685000  |
| C | 3.17790300  | 1.05719200  | -1.18316100 |
| H | 4.01022500  | 0.81438200  | -0.51792600 |
| H | 3.60431000  | 1.19186600  | -2.18508400 |
| H | 2.76170400  | 2.02466600  | -0.87717500 |
| C | 1.23814800  | 0.24647500  | -2.49060900 |
| H | 0.46864500  | -0.51859900 | -2.62308500 |
| H | 0.74151900  | 1.22303800  | -2.42855100 |
| H | 1.88251500  | 0.24667800  | -3.37893900 |
| C | -0.08817100 | 3.00940900  | 1.37088100  |
| H | 0.88335300  | 3.21826700  | 1.83854800  |
| H | -0.67677400 | 2.36108200  | 2.03334700  |
| H | -0.63243400 | 3.95878000  | 1.27756000  |
| O | -3.79253200 | 0.26062400  | -0.42204400 |
| N | -3.81623800 | -0.92878500 | 0.00742300  |
| O | -4.83245100 | -1.55249500 | 0.18774800  |
| O | -2.65993200 | -1.43862900 | 0.24484700  |

### <sup>3</sup>int1

|    |             |             |             |
|----|-------------|-------------|-------------|
| Cu | -1.80816500 | 0.27462000  | 0.00567600  |
| O  | -1.25747700 | 1.67860800  | 1.31666100  |
| H  | 4.10308200  | -0.25985400 | 1.32443900  |
| C  | 4.13663300  | -0.65226200 | 0.29663700  |
| C  | 3.22402800  | -1.85735500 | 0.14853900  |
| C  | 3.72889700  | 0.41574800  | -0.70445400 |
| H  | 5.17868400  | -0.95086200 | 0.12152700  |
| H  | 3.49471100  | -2.65420200 | 0.85699300  |
| H  | 3.35365500  | -2.27740700 | -0.86286100 |
| H  | 4.38029000  | 1.29956200  | -0.63530100 |
| H  | 3.84729900  | 0.01350600  | -1.72436300 |
| N  | 1.39648200  | -0.30962600 | -0.41928800 |
| O  | 0.17522200  | -0.15007600 | -0.74645300 |
| C  | 2.28358500  | 0.88806000  | -0.53362800 |
| C  | 1.73874200  | -1.54309000 | 0.34833000  |
| C  | 0.90564200  | -2.69558600 | -0.19979600 |
| H  | -0.14812400 | -2.60684500 | 0.08289800  |
| H  | 0.97745000  | -2.75075700 | -1.29290300 |
| H  | 1.28973200  | -3.63406200 | 0.22112800  |
| C  | 1.39055000  | -1.32364500 | 1.82244400  |
| H  | 0.36425800  | -0.94487100 | 1.92090000  |
| H  | 1.44767100  | -2.28221900 | 2.35523600  |
| H  | 2.06732400  | -0.61960600 | 2.32022200  |



|   |             |             |             |
|---|-------------|-------------|-------------|
| C | 2.12867000  | 1.76479500  | 0.71293100  |
| H | 2.64021100  | 1.35136700  | 1.58993200  |
| H | 2.55926900  | 2.75497700  | 0.51314900  |
| H | 1.07151800  | 1.89649900  | 0.97364800  |
| C | 1.84867700  | 1.67474100  | -1.76318500 |
| H | 1.81860200  | 1.03187700  | -2.65161500 |
| H | 0.85804100  | 2.12418200  | -1.63337100 |
| H | 2.57466800  | 2.47907900  | -1.93924200 |
| O | -2.22306000 | -1.49066500 | 0.85704100  |
| N | -2.77271900 | -1.90517900 | -0.22606700 |
| O | -3.20139800 | -3.01136000 | -0.36166800 |
| O | -2.80266400 | -1.01494300 | -1.14307400 |
| N | -1.40304200 | 2.59945600  | 0.43324200  |
| O | -1.86176500 | 2.16357100  | -0.67567200 |
| O | -1.11624800 | 3.74294700  | 0.62976900  |

**<sup>3</sup>int2**

|    |             |             |             |
|----|-------------|-------------|-------------|
| Cu | -1.25764900 | 0.41743600  | -0.13474800 |
| O  | -0.65965800 | 1.37123700  | 1.48655200  |
| H  | 4.32935600  | -1.32570700 | 1.16328300  |
| C  | 4.39962000  | -1.34848900 | 0.06503300  |
| C  | 3.27524200  | -2.17735800 | -0.53236800 |
| C  | 4.34830200  | 0.05743400  | -0.50833400 |
| H  | 5.36776600  | -1.81205300 | -0.16631300 |
| H  | 3.29177000  | -3.20948000 | -0.15170600 |
| H  | 3.42080500  | -2.24084500 | -1.62354200 |
| H  | 5.15777800  | 0.68430600  | -0.10605600 |
| H  | 4.50323200  | 0.00235300  | -1.59870200 |
| N  | 1.89408900  | -0.14534300 | -0.56435700 |
| O  | 0.78050200  | 0.42356300  | -0.81101400 |
| C  | 3.02528600  | 0.77796900  | -0.24414400 |
| C  | 1.87945200  | -1.60714200 | -0.26612300 |
| C  | 0.87625300  | -2.27243800 | -1.20207300 |
| H  | -0.16065900 | -2.04228000 | -0.93629700 |
| H  | 1.04138100  | -1.96340500 | -2.24138800 |
| H  | 1.00783100  | -3.36063500 | -1.13563100 |
| C  | 1.45128200  | -1.82797700 | 1.18760900  |
| H  | 0.56157100  | -1.22977100 | 1.41944700  |
| H  | 1.19270900  | -2.88591800 | 1.33273800  |
| H  | 2.23768700  | -1.56941600 | 1.90623200  |
| C  | 2.90075700  | 1.22808700  | 1.21406700  |
| H  | 3.13380800  | 0.42919400  | 1.92823500  |
| H  | 3.59973500  | 2.05499300  | 1.39745400  |
| H  | 1.88399700  | 1.58682900  | 1.42091100  |

|   |             |             |             |
|---|-------------|-------------|-------------|
| C | 2.91015800  | 1.99365500  | -1.15486000 |
| H | 2.84772000  | 1.69213100  | -2.20779700 |
| H | 2.02681600  | 2.59596800  | -0.91752100 |
| H | 3.80431500  | 2.61674600  | -1.02246900 |
| O | -3.79841800 | -0.25500900 | -0.72826400 |
| N | -3.22643400 | -0.28446800 | -1.83876000 |
| O | -3.78930700 | -0.45872400 | -2.88884100 |
| O | -1.93468900 | -0.12481600 | -1.84304500 |
| N | -0.73358800 | 2.54281100  | 0.94243200  |
| O | -1.23985400 | 2.53718900  | -0.21263600 |
| O | -0.33512000 | 3.52291200  | 1.50715100  |
| O | -1.90276500 | -1.28080400 | 0.88162700  |
| H | -2.74875300 | -1.32953400 | 0.38230200  |
| C | -2.23920600 | -1.11160200 | 2.27168300  |
| H | -2.96932200 | -0.29366500 | 2.36952100  |
| H | -1.31712400 | -0.78925000 | 2.76790700  |
| C | -2.75654500 | -2.40738900 | 2.84336900  |
| H | -2.97596100 | -2.29455200 | 3.91189200  |
| H | -3.68063000 | -2.72221100 | 2.34147900  |
| H | -2.01159800 | -3.20333900 | 2.72312800  |

**<sup>3</sup>int3**

|    |             |             |             |
|----|-------------|-------------|-------------|
| Cu | -1.56732400 | -0.10952100 | -0.27620800 |
| O  | 0.33964400  | 2.62931200  | -0.92007600 |
| H  | 3.82703800  | -1.83618100 | 1.51179300  |
| C  | 3.57855300  | -2.43299100 | 0.62139400  |
| C  | 2.18750800  | -3.03023300 | 0.74793800  |
| C  | 3.66541900  | -1.58719000 | -0.63819300 |
| H  | 4.32328400  | -3.23868300 | 0.58217200  |
| H  | 2.09965100  | -3.64183000 | 1.65797700  |
| H  | 2.00641600  | -3.70351400 | -0.10658300 |
| H  | 4.65872600  | -1.12611800 | -0.74015700 |
| H  | 3.52384000  | -2.23490000 | -1.51915600 |
| N  | 1.28678500  | -1.04439400 | -0.35035800 |
| O  | 0.29983900  | -0.41120500 | -0.86605500 |
| C  | 2.62789600  | -0.46574200 | -0.69285300 |
| C  | 1.06070100  | -1.99035500 | 0.78469600  |
| C  | -0.26839700 | -2.70978500 | 0.58130600  |
| H  | -1.13333500 | -2.10157200 | 0.88725600  |
| H  | -0.41315100 | -3.03202700 | -0.45670800 |
| H  | -0.28182000 | -3.59716200 | 1.22704500  |
| C  | 1.01991200  | -1.22517900 | 2.11098400  |
| H  | 0.36981200  | -0.34349900 | 2.02342900  |
| H  | 0.61388100  | -1.88729200 | 2.88817900  |

|   |             |             |             |
|---|-------------|-------------|-------------|
| H | 2.01011200  | -0.89222200 | 2.43973700  |
| C | 2.94078200  | 0.66094100  | 0.30053800  |
| H | 3.35917200  | 0.29673400  | 1.24548200  |
| H | 3.67330900  | 1.34502800  | -0.14776700 |
| H | 2.03370800  | 1.23221600  | 0.53139700  |
| C | 2.55503000  | 0.11427400  | -2.09964200 |
| H | 2.14943500  | -0.61521300 | -2.81143300 |
| H | 1.94118600  | 1.02145700  | -2.13295500 |
| H | 3.57477600  | 0.37459400  | -2.41186400 |
| O | -3.57005600 | -0.00502500 | -0.20371800 |
| N | -3.69039400 | -0.96143200 | -1.05314500 |
| O | -4.74864900 | -1.37126800 | -1.42805400 |
| O | -2.56825400 | -1.42642300 | -1.44775800 |
| N | 1.23031700  | 3.46403200  | -0.33823000 |
| O | 2.03964700  | 3.94806400  | -1.08710200 |
| O | 1.13117600  | 3.62325900  | 0.86233400  |
| O | -0.94744100 | 1.25292200  | 0.83570000  |
| H | -0.18108100 | 2.18334800  | -0.15208500 |
| C | -1.88016500 | 1.89584400  | 1.66716000  |
| H | -2.76664400 | 2.22190000  | 1.09298600  |
| H | -1.39351200 | 2.81375300  | 2.04056200  |
| C | -2.30297500 | 1.01419700  | 2.82269600  |
| H | -3.03360800 | 1.52152400  | 3.46537700  |
| H | -2.77180500 | 0.09033700  | 2.45090900  |
| H | -1.43679000 | 0.73824000  | 3.43825900  |

### **<sup>3</sup>int4**

|    |             |             |             |
|----|-------------|-------------|-------------|
| Cu | -1.52628000 | 0.37257900  | -0.53803700 |
| O  | -0.97629100 | 2.03855100  | -0.10754500 |
| H  | 3.75015300  | 0.55668300  | 1.65239300  |
| C  | 3.95080400  | -0.34848900 | 1.05901100  |
| C  | 2.92460200  | -1.42770800 | 1.35208900  |
| C  | 3.92825100  | -0.03952900 | -0.42735700 |
| H  | 4.95046700  | -0.69190400 | 1.35680000  |
| H  | 2.92645600  | -1.70813100 | 2.41569000  |
| H  | 3.19648700  | -2.33517100 | 0.78756800  |
| H  | 4.67615000  | 0.72261200  | -0.69196200 |
| H  | 4.19735900  | -0.95337900 | -0.98311700 |
| N  | 1.48873500  | -0.42694100 | -0.38333600 |
| O  | 0.39040100  | -0.43316900 | -1.03560800 |
| C  | -1.48031700 | 2.83188100  | 0.90947500  |
| H  | -1.49560400 | 3.87196100  | 0.53032500  |
| C  | 2.56903400  | 0.45388300  | -0.92634400 |
| C  | 1.49010300  | -1.04171700 | 0.97795900  |

|   |             |             |             |
|---|-------------|-------------|-------------|
| C | 0.63502300  | -2.30294500 | 0.93376800  |
| H | -0.43091100 | -2.07820200 | 0.82639300  |
| H | 0.94427700  | -2.95535900 | 0.10785600  |
| H | 0.77122700  | -2.84953100 | 1.87639500  |
| C | 0.89782200  | -0.05645600 | 1.98921300  |
| H | -0.10502800 | 0.26754700  | 1.67946900  |
| H | 0.80149500  | -0.55548900 | 2.96281500  |
| H | 1.51740700  | 0.83872200  | 2.12312500  |
| C | 2.30116900  | 1.89752300  | -0.49165200 |
| H | 2.50575700  | 2.05977900  | 0.57436000  |
| H | 2.95680100  | 2.57020100  | -1.06159400 |
| H | 1.25523700  | 2.17031000  | -0.68139400 |
| C | 2.52283900  | 0.36760800  | -2.44636300 |
| H | 2.57220200  | -0.67555400 | -2.78294500 |
| H | 1.60972400  | 0.81694600  | -2.84814200 |
| H | 3.38839100  | 0.90610200  | -2.85426300 |
| C | -2.86090800 | 2.43464500  | 1.39038700  |
| H | -3.22822100 | 3.12637800  | 2.15936600  |
| H | -2.85238300 | 1.42340700  | 1.82057500  |
| H | -3.57491500 | 2.44127300  | 0.55466300  |
| O | -2.54505600 | -0.98466100 | 0.73105000  |
| N | -3.00723300 | -1.55743000 | -0.31015000 |
| O | -3.73629400 | -2.51008000 | -0.26804900 |
| O | -2.62630200 | -1.02819800 | -1.41286100 |
| H | -0.76312500 | 2.84488100  | 1.75607100  |

**<sup>3</sup>TS1**

|    |             |             |             |
|----|-------------|-------------|-------------|
| Cu | -1.63642800 | 0.03300100  | -0.26645600 |
| O  | -0.99175200 | 1.46904600  | -1.31656700 |
| H  | 4.37960700  | -1.06202000 | 0.22473600  |
| C  | 3.50763900  | -1.71335000 | 0.39262700  |
| C  | 2.67860600  | -1.21749500 | 1.56630300  |
| C  | 2.64148800  | -1.79012600 | -0.85353900 |
| H  | 3.91705300  | -2.70629000 | 0.62220600  |
| H  | 3.29276200  | -1.12671700 | 2.47527700  |
| H  | 1.88688900  | -1.95002400 | 1.78508400  |
| H  | 3.22539900  | -2.12741900 | -1.72347400 |
| H  | 1.84630000  | -2.53385100 | -0.69320600 |
| N  | 1.22599300  | 0.06902800  | 0.00343800  |
| O  | 0.09912000  | -0.66851300 | 0.20680200  |
| C  | -0.12680300 | 2.25691300  | -0.68341700 |
| H  | 0.79069600  | 1.31622100  | -0.29273000 |
| H  | 0.38679400  | 2.95807200  | -1.36821600 |
| C  | 1.97368200  | -0.46356600 | -1.22691700 |

|   |             |             |             |
|---|-------------|-------------|-------------|
| C | 2.01089300  | 0.13817300  | 1.31740100  |
| C | 1.03378900  | 0.42343200  | 2.45200700  |
| H | 0.60120000  | 1.42795700  | 2.37033300  |
| H | 0.22622800  | -0.31174800 | 2.48696800  |
| H | 1.58865500  | 0.38230700  | 3.39856900  |
| C | 3.02829500  | 1.27904200  | 1.28897800  |
| H | 2.59996500  | 2.19298700  | 0.85460700  |
| H | 3.31409100  | 1.51174500  | 2.32282900  |
| H | 3.95101400  | 1.04459100  | 0.75196100  |
| C | 2.98049500  | 0.56417500  | -1.74039200 |
| H | 3.88666200  | 0.65041500  | -1.13582600 |
| H | 3.29758100  | 0.26108900  | -2.74628400 |
| H | 2.52674800  | 1.56019500  | -1.83017500 |
| C | 0.96671700  | -0.71636500 | -2.34483000 |
| H | 0.22226300  | -1.46259100 | -2.05160300 |
| H | 0.44481800  | 0.19982200  | -2.64334100 |
| H | 1.51538800  | -1.10502900 | -3.21277300 |
| C | -0.61250900 | 2.93178500  | 0.58186900  |
| H | 0.19871600  | 3.45146400  | 1.10838700  |
| H | -1.07339800 | 2.20987000  | 1.27249700  |
| H | -1.38577900 | 3.67165800  | 0.32668400  |
| O | -3.62338800 | 0.28444100  | -0.19138700 |
| N | -3.79302500 | -0.87566900 | 0.32937100  |
| O | -4.87022900 | -1.30967800 | 0.61939200  |
| O | -2.70222000 | -1.51516400 | 0.50607500  |

**CuNO<sub>3</sub>**

|    |             |             |             |
|----|-------------|-------------|-------------|
| Cu | -1.22761300 | -0.00003200 | -0.00004400 |
| O  | 0.50668200  | -1.08394400 | 0.00013700  |
| N  | 1.19168300  | -0.00001600 | 0.00005700  |
| O  | 2.39361800  | -0.00032700 | -0.00016400 |
| O  | 0.50707300  | 1.08440100  | 0.00013700  |

**TEMPOH**

|   |             |             |             |
|---|-------------|-------------|-------------|
| H | -0.00000300 | 2.19600400  | 1.16098100  |
| C | -0.00000400 | 2.14238600  | 0.06121200  |
| C | 1.23864300  | 1.42151700  | -0.44481000 |
| C | -1.23864900 | 1.42151300  | -0.44480900 |
| H | -0.00000600 | 3.18361600  | -0.28950500 |
| H | 2.16005100  | 1.90876600  | -0.09171100 |
| H | 1.25074700  | 1.47367400  | -1.54551100 |
| H | -2.16005800 | 1.90876000  | -0.09170900 |
| H | -1.25075300 | 1.47367000  | -1.54551000 |
| N | 0.00000200  | -0.66387300 | -0.43706300 |

|   |             |             |             |
|---|-------------|-------------|-------------|
| O | 0.00000600  | -2.04302200 | -0.15735600 |
| C | -1.28949300 | -0.05615500 | -0.04301600 |
| C | 1.28949300  | -0.05615000 | -0.04301600 |
| C | 2.37519500  | -0.74570200 | -0.86671500 |
| H | 2.49592900  | -1.79343500 | -0.57033500 |
| H | 2.10893800  | -0.72359100 | -1.93042400 |
| H | 3.33696900  | -0.23195600 | -0.73069700 |
| C | 1.65595500  | -0.19812400 | 1.44203500  |
| H | 1.61200400  | -1.24497200 | 1.77348300  |
| H | 2.69364300  | 0.12874700  | 1.59208000  |
| H | 1.02658700  | 0.39947300  | 2.11041500  |
| C | -1.65595400 | -0.19812900 | 1.44203500  |
| H | -1.02658800 | 0.39947000  | 2.11041500  |
| H | -2.69364200 | 0.12874100  | 1.59208100  |
| H | -1.61200200 | -1.24497600 | 1.77348400  |
| C | -2.37519400 | -0.74570700 | -0.86671600 |
| H | -2.10893700 | -0.72359600 | -1.93042400 |
| H | -2.49592700 | -1.79344000 | -0.57033500 |
| H | -3.33696900 | -0.23196300 | -0.73069800 |
| H | 0.00000800  | -2.13439000 | 0.81501200  |

**int5**

|   |             |             |             |
|---|-------------|-------------|-------------|
| C | -0.23704400 | 0.41124400  | 0.00001000  |
| O | -1.22078600 | -0.28590800 | -0.00000300 |
| H | -0.32933100 | 1.52397600  | -0.00002000 |
| C | 1.16430900  | -0.13514100 | -0.00000300 |
| H | 1.30465900  | -0.77378300 | -0.88072300 |
| H | 1.92262000  | 0.65403300  | -0.00012400 |
| H | 1.30474700  | -0.77358400 | 0.88084800  |

**H<sub>2</sub>O\_HNO<sub>3</sub>**

|   |             |             |             |
|---|-------------|-------------|-------------|
| H | -1.94617000 | -0.84364100 | -0.11254500 |
| O | -2.35987300 | 0.03456800  | -0.07474500 |
| H | -2.83770300 | 0.05634500  | 0.76483800  |
| O | 0.11777300  | 1.08253900  | -0.02308400 |
| H | -0.84786200 | 0.80219700  | -0.04710500 |
| N | 0.83081600  | -0.07455300 | 0.00053200  |
| O | 0.19949700  | -1.11871300 | -0.01154400 |
| O | 2.01960600  | 0.06497800  | 0.03326000  |

**int6**

|   |            |             |             |
|---|------------|-------------|-------------|
| C | 2.13569400 | -0.22541800 | 0.00165700  |
| H | 1.88219200 | 0.83628400  | -0.20835000 |
| C | 3.54060200 | -0.65470700 | -0.23583500 |

|   |             |             |             |
|---|-------------|-------------|-------------|
| H | 3.67140000  | -1.71147200 | 0.01390600  |
| H | 3.80568900  | -0.47924100 | -1.28721100 |
| H | 4.22443400  | -0.03591000 | 0.36052500  |
| O | 1.27567700  | -0.98747500 | 0.41434600  |
| H | -0.27131200 | 2.08201300  | -0.13443400 |
| O | 0.56654900  | 2.56599500  | -0.20306600 |
| H | 0.54422500  | 3.18147000  | 0.53918200  |
| O | -1.04310800 | 0.32563000  | 0.50043500  |
| H | -0.24455200 | -0.29150300 | 0.51016400  |
| N | -2.07926400 | -0.40339600 | -0.03862200 |
| O | -1.84257200 | -1.55790500 | -0.29877900 |
| O | -3.09592200 | 0.21911500  | -0.17773200 |

**TS2**

|   |             |             |             |
|---|-------------|-------------|-------------|
| C | -1.83908100 | -0.24931200 | -0.33942800 |
| H | -1.60592100 | 0.01413600  | -1.37865500 |
| C | -3.24407100 | -0.17492300 | 0.12217700  |
| H | -3.26950400 | -0.18631700 | 1.21579500  |
| H | -3.75000400 | 0.71656500  | -0.25888800 |
| H | -3.77459000 | -1.06146700 | -0.24848500 |
| O | -1.08493900 | -1.11607200 | 0.23186600  |
| H | -0.16487600 | 1.17403200  | 0.07496500  |
| O | -1.13646400 | 1.37977600  | 0.30676800  |
| H | -1.38311100 | 2.14175500  | -0.24220300 |
| O | 0.87596600  | 0.13646500  | -0.59684400 |
| H | -0.12503600 | -0.96229500 | -0.13497200 |
| N | 2.06018100  | -0.05061300 | -0.04299400 |
| O | 2.37787700  | -1.20479300 | 0.20089200  |
| O | 2.73639500  | 0.93753500  | 0.17943100  |

**int6'**

|   |             |             |             |
|---|-------------|-------------|-------------|
| C | 0.60702300  | 0.12771100  | 0.00108600  |
| H | 2.37079000  | 0.94595600  | -0.87773800 |
| H | 2.38513300  | 0.90408700  | 0.88058300  |
| O | 0.07789100  | -0.96382600 | -0.00088300 |
| H | -0.02354900 | 1.04437300  | 0.01388300  |
| C | 2.08473000  | 0.33605900  | -0.01030500 |
| H | -1.78665900 | -0.37469000 | 0.13599500  |
| O | -2.43669000 | 0.34827000  | 0.09079600  |
| H | -2.83532300 | 0.24552900  | -0.78065600 |
| H | 2.60948100  | -0.62342500 | -0.03604500 |

**TS2'**

|   |             |            |            |
|---|-------------|------------|------------|
| C | -0.14297600 | 0.20126300 | 0.41854800 |
|---|-------------|------------|------------|

|   |             |             |             |
|---|-------------|-------------|-------------|
| H | -0.03890600 | 0.07784500  | 1.51933100  |
| C | -1.42553000 | -0.34600800 | -0.12787100 |
| H | -1.35360600 | -0.41094100 | -1.21893200 |
| H | -1.67098900 | -1.32722600 | 0.29235200  |
| H | -2.22987000 | 0.35782000  | 0.12153500  |
| O | 0.41001700  | 1.23163500  | -0.14952300 |
| H | 1.22095900  | 0.26153600  | -0.48547400 |
| O | 1.06449100  | -0.85986100 | -0.16612200 |
| H | 1.68738200  | -1.06476500 | 0.55228600  |

**int7**

|   |             |             |             |
|---|-------------|-------------|-------------|
| C | -0.04326900 | -0.00642500 | 0.34699900  |
| H | -0.10706000 | 0.04755400  | 1.45537200  |
| C | 1.39809200  | 0.02168300  | -0.09638900 |
| H | 1.42824400  | -0.00445400 | -1.19150600 |
| H | 1.89453200  | 0.93541800  | 0.25283000  |
| H | 1.94185300  | -0.84462400 | 0.29680500  |
| O | -0.60519900 | -1.18386000 | -0.12330700 |
| H | -1.56100000 | -1.10740700 | 0.00956600  |
| O | -0.78881000 | 1.06087400  | -0.20328200 |
| H | -0.57343500 | 1.86585900  | 0.28598700  |

**int8**

|    |             |             |             |
|----|-------------|-------------|-------------|
| Cu | -1.04320400 | 0.49792900  | -0.49066800 |
| O  | -0.44570500 | 1.12655200  | 1.25251500  |
| H  | 4.38641500  | -1.42881900 | 1.07323100  |
| C  | 4.37949500  | -1.36021400 | -0.02430900 |
| C  | 3.26456500  | -2.20720900 | -0.61384900 |
| C  | 4.23488000  | 0.08330700  | -0.47625800 |
| H  | 5.34991300  | -1.75310600 | -0.35457200 |
| H  | 3.32895000  | -3.25014900 | -0.27080200 |
| H  | 3.36632800  | -2.22787100 | -1.71100800 |
| H  | 5.03175200  | 0.71604900  | -0.05935400 |
| H  | 4.32875800  | 0.13423500  | -1.57317000 |
| N  | 1.81773500  | -0.22434600 | -0.53478000 |
| O  | 0.87016300  | 0.22430200  | -1.18436500 |
| C  | 2.89690700  | 0.72771100  | -0.07384900 |
| C  | 1.84971200  | -1.71132500 | -0.28003000 |
| C  | 0.82857500  | -2.37806200 | -1.18808600 |
| H  | -0.20141200 | -2.17244900 | -0.87314900 |
| H  | 0.94543100  | -2.07029300 | -2.23362500 |
| H  | 0.99039200  | -3.46180700 | -1.12397700 |
| C  | 1.46902900  | -1.96058400 | 1.18367000  |
| H  | 0.59924600  | -1.35277100 | 1.46250100  |



|   |             |             |             |
|---|-------------|-------------|-------------|
| H | 1.19123500  | -3.01758700 | 1.28594900  |
| H | 2.28306900  | -1.75319800 | 1.88486900  |
| C | 2.82585800  | 0.95189500  | 1.44133500  |
| H | 3.20480800  | 0.10304500  | 2.01845900  |
| H | 3.45853900  | 1.81790000  | 1.67386300  |
| H | 1.80850400  | 1.17561700  | 1.77718900  |
| C | 2.70225000  | 2.04541900  | -0.80408800 |
| H | 2.68273600  | 1.90461600  | -1.89138100 |
| H | 1.77849400  | 2.55825100  | -0.51189000 |
| H | 3.54980500  | 2.69537100  | -0.55447400 |
| O | -3.25900400 | 0.45530000  | -1.00201200 |
| N | -2.88338700 | 0.13324300  | -2.16470100 |
| O | -3.63418400 | -0.06001700 | -3.08492400 |
| O | -1.60872500 | 0.01242400  | -2.30659400 |
| N | -0.28230300 | 2.43148200  | 1.14157100  |
| O | -0.55650500 | 2.92997000  | 0.04916100  |
| O | 0.15147100  | 3.02954500  | 2.10193400  |
| O | -1.98126400 | -1.46291000 | 0.62678300  |
| H | -2.80838900 | -1.17369200 | 0.19189100  |
| C | -2.24095500 | -1.41176100 | 2.03251200  |
| C | -3.29685100 | -2.41763800 | 2.41412400  |
| H | -3.44537300 | -2.42356800 | 3.49938700  |
| H | -4.24900000 | -2.13794800 | 1.94357200  |
| H | -3.01380800 | -3.42117500 | 2.07948900  |
| O | -2.67844000 | -0.16198800 | 2.42182600  |
| H | -1.95497800 | 0.47093100  | 2.25533800  |
| H | -1.26603100 | -1.66882500 | 2.48478800  |

**int9**

|    |             |             |             |
|----|-------------|-------------|-------------|
| Cu | -1.70797800 | 0.04671200  | -0.33865500 |
| O  | 0.56680300  | 2.62815500  | -1.20820300 |
| H  | 3.86159000  | -2.23180100 | 0.92123700  |
| C  | 3.31116300  | -2.80630800 | 0.16270500  |
| C  | 1.97308400  | -3.27690500 | 0.70848800  |
| C  | 3.11627800  | -1.98724400 | -1.10264600 |
| H  | 3.93792200  | -3.67923800 | -0.06220000 |
| H  | 2.09522600  | -3.83663200 | 1.64735700  |
| H  | 1.50091900  | -3.96185000 | -0.01446700 |
| H  | 4.07407300  | -1.61066900 | -1.48967800 |
| H  | 2.67930100  | -2.62192500 | -1.89042200 |
| N  | 0.95171600  | -1.30068400 | -0.26757800 |
| O  | -0.11263200 | -1.21389800 | -0.86729900 |
| C  | 2.20592500  | -0.75284100 | -0.92140300 |
| C  | 0.98066600  | -2.13228100 | 0.99692900  |

|   |             |             |             |
|---|-------------|-------------|-------------|
| C | -0.41229200 | -2.68952700 | 1.23360000  |
| H | -1.12438600 | -1.90244500 | 1.51592500  |
| H | -0.81241000 | -3.21540700 | 0.35970300  |
| H | -0.35202000 | -3.39658800 | 2.06993300  |
| C | 1.40958800  | -1.28456300 | 2.19798700  |
| H | 0.88859600  | -0.31927100 | 2.23478100  |
| H | 1.15212200  | -1.84996900 | 3.10282600  |
| H | 2.48494800  | -1.09096000 | 2.22786900  |
| C | 2.86564200  | 0.31448100  | -0.04181400 |
| H | 3.52653900  | -0.10484300 | 0.72238800  |
| H | 3.46953200  | 0.96070100  | -0.69099800 |
| H | 2.12697700  | 0.95358500  | 0.45142400  |
| C | 1.82595700  | -0.16690600 | -2.26719400 |
| H | 1.29401200  | -0.88969800 | -2.89629100 |
| H | 1.22175000  | 0.74432900  | -2.16099200 |
| H | 2.75531100  | 0.11981600  | -2.77429600 |
| O | -3.85669500 | 0.47308000  | -0.24852000 |
| N | -4.02108400 | -0.61241100 | -0.87118100 |
| O | -5.09153900 | -1.05472500 | -1.18844300 |
| O | -2.92435500 | -1.24014800 | -1.15131600 |
| N | 1.68497400  | 3.10928900  | -0.79563700 |
| O | 2.58671000  | 3.28604600  | -1.59704700 |
| O | 1.81500200  | 3.35647500  | 0.42076800  |
| O | -0.47079200 | 1.18292200  | 0.55118500  |
| H | -0.03556300 | 1.82221600  | -0.14666000 |
| C | -0.78095200 | 1.98996200  | 1.71718000  |
| H | -1.12589900 | 2.96395900  | 1.32821200  |
| C | -1.84103800 | 1.30227600  | 2.53100700  |
| H | -2.05811700 | 1.89549900  | 3.42541200  |
| H | -2.76925900 | 1.17400500  | 1.96104100  |
| H | -1.47291700 | 0.32005400  | 2.86064900  |
| O | 0.36222600  | 2.12070400  | 2.46881300  |
| H | 0.98193600  | 2.65934900  | 1.93045900  |

**int10**

|    |             |             |             |
|----|-------------|-------------|-------------|
| Cu | -1.61586500 | 0.13849400  | 0.37049700  |
| O  | -1.06333000 | 1.89478300  | 0.46998900  |
| H  | 4.32137900  | -1.26520700 | -0.29893000 |
| C  | 3.53281600  | -1.91773800 | 0.10575200  |
| C  | 2.96433100  | -1.34057300 | 1.39610000  |
| C  | 2.43354300  | -2.13552800 | -0.92594700 |
| H  | 4.02336200  | -2.87630400 | 0.32172800  |
| H  | 3.75658000  | -1.17023900 | 2.14067700  |
| H  | 2.25538300  | -2.06055800 | 1.83558300  |

|   |             |             |             |
|---|-------------|-------------|-------------|
| H | 2.84387900  | -2.53534200 | -1.86527700 |
| H | 1.71833000  | -2.88120000 | -0.54262400 |
| N | 1.20588900  | -0.30325900 | 0.08679600  |
| O | 0.10994100  | -0.77535800 | 0.51064500  |
| C | -0.12986400 | 2.22663300  | -0.41472800 |
| C | 1.63486900  | -0.86227100 | -1.26350700 |
| C | 2.21282900  | -0.01247300 | 1.18902600  |
| C | 1.43497900  | 0.37569700  | 2.43904000  |
| H | 0.80644500  | 1.25804800  | 2.25610200  |
| H | 0.78974000  | -0.43400400 | 2.79180400  |
| H | 2.15315400  | 0.61557400  | 3.23278500  |
| C | 3.17280300  | 1.12165800  | 0.84232000  |
| H | 2.64186800  | 2.01397100  | 0.48917900  |
| H | 3.70836300  | 1.39864900  | 1.75908700  |
| H | 3.93169800  | 0.85477600  | 0.10293200  |
| C | 2.44880200  | 0.13681700  | -2.07854200 |
| H | 3.44938600  | 0.33263600  | -1.68547800 |
| H | 2.57817500  | -0.28176800 | -3.08477500 |
| H | 1.91216700  | 1.08849400  | -2.18804200 |
| C | 0.38174900  | -1.20938600 | -2.05533000 |
| H | -0.26293600 | -1.92376300 | -1.53392400 |
| H | -0.19384300 | -0.30126700 | -2.28071400 |
| H | 0.69593300  | -1.65699300 | -3.00680200 |
| C | 0.43604100  | 3.61799100  | -0.15217800 |
| H | 1.22825800  | 3.84955500  | -0.87471200 |
| H | 0.83380500  | 3.68573600  | 0.86775400  |
| H | -0.36750200 | 4.35786800  | -0.25708300 |
| O | -3.79157400 | 0.16153400  | 0.17455500  |
| N | -3.74584500 | -1.09907500 | 0.13703300  |
| O | -4.71316500 | -1.80547500 | 0.01680700  |
| O | -2.55866300 | -1.59352900 | 0.23787900  |
| H | 0.74251800  | 1.49503700  | -0.36282700 |
| O | -0.55566300 | 2.09913000  | -1.76551400 |
| H | -1.48410500 | 2.38263900  | -1.77458100 |

### TS3

|    |             |             |             |
|----|-------------|-------------|-------------|
| Cu | -1.66665900 | 0.17057900  | 0.21520500  |
| O  | -0.98715300 | 1.90272800  | 0.37978900  |
| H  | 4.21225600  | -1.53313500 | -0.06133200 |
| C  | 3.31615600  | -2.12587600 | 0.17869200  |
| C  | 2.64571800  | -1.60507400 | 1.44323800  |
| C  | 2.33968200  | -2.12489000 | -0.98949400 |
| H  | 3.67590000  | -3.14889900 | 0.35121900  |
| H  | 3.35054900  | -1.58935200 | 2.28831900  |

|   |             |             |             |
|---|-------------|-------------|-------------|
| H | 1.82168200  | -2.27913200 | 1.72267700  |
| H | 2.82626600  | -2.47707000 | -1.91153500 |
| H | 1.51716700  | -2.82405300 | -0.77416200 |
| N | 1.15407100  | -0.24433100 | 0.05267400  |
| O | 0.03684600  | -0.81525000 | 0.32848000  |
| C | 0.05176100  | 2.21222700  | -0.31742500 |
| H | 0.82927600  | 1.21896400  | -0.19346500 |
| C | 1.71526200  | -0.75401400 | -1.28552900 |
| C | 2.06851200  | -0.19182100 | 1.28714000  |
| C | 1.19523600  | 0.16705300  | 2.48218500  |
| H | 0.69193700  | 1.13246100  | 2.33885300  |
| H | 0.42714300  | -0.58829300 | 2.66765100  |
| H | 1.83431900  | 0.23848500  | 3.37116800  |
| C | 3.17619200  | 0.84826500  | 1.15974500  |
| H | 2.79654300  | 1.81954100  | 0.82224900  |
| H | 3.61196000  | 0.99964300  | 2.15536400  |
| H | 3.99544300  | 0.54921500  | 0.50122900  |
| C | 2.71721900  | 0.22160700  | -1.89025300 |
| H | 3.68690200  | 0.24696300  | -1.38696600 |
| H | 2.90321400  | -0.08156600 | -2.92827000 |
| H | 2.30981700  | 1.24064000  | -1.91871800 |
| C | 0.54834700  | -0.91128800 | -2.25273800 |
| H | -0.20624000 | -1.60944000 | -1.87872200 |
| H | 0.06653100  | 0.05366700  | -2.45422400 |
| H | 0.94308500  | -1.30342600 | -3.19916100 |
| C | 0.83534900  | 3.41705900  | 0.18700900  |
| H | 1.78359200  | 3.55041500  | -0.35227800 |
| H | 1.04462900  | 3.31613800  | 1.25667200  |
| H | 0.21654600  | 4.31208300  | 0.04176900  |
| O | -3.84742800 | 0.26203900  | 0.44086900  |
| N | -3.88097700 | -0.95075600 | 0.09568900  |
| O | -4.89846300 | -1.59107500 | -0.00801000 |
| O | -2.73036300 | -1.47733700 | -0.14486000 |
| O | -0.20694800 | 2.27825500  | -1.69825700 |
| H | 0.49439600  | 2.78060500  | -2.13733100 |

### CH3COOH

|   |             |             |             |
|---|-------------|-------------|-------------|
| C | -1.38738500 | -0.09756600 | -0.00000100 |
| H | -1.90471900 | 0.86369600  | 0.00014100  |
| H | -1.67878600 | -0.67990300 | -0.88141500 |
| H | -1.67879000 | -0.68014600 | 0.88125300  |
| C | 0.09275500  | 0.12519000  | 0.00000600  |
| O | 0.65527800  | 1.19132800  | -0.00000200 |
| O | 0.76031500  | -1.04811200 | 0.00000000  |

|               |             |             |             |
|---------------|-------------|-------------|-------------|
| H             | 1.70532500  | -0.81511300 | 0.00000000  |
| <b>TEMPO+</b> |             |             |             |
| H             | 0.00000000  | 2.29693100  | 0.91400700  |
| C             | 0.00000000  | 2.10015600  | -0.16724600 |
| C             | 1.24270700  | 1.33896900  | -0.59290400 |
| C             | -1.24270600 | 1.33896800  | -0.59290500 |
| H             | 0.00000000  | 3.08633500  | -0.64598300 |
| H             | 2.15937800  | 1.87172100  | -0.30458100 |
| H             | 1.26652600  | 1.25540800  | -1.69040100 |
| H             | -2.15937800 | 1.87172000  | -0.30458500 |
| H             | -1.26652200 | 1.25540500  | -1.69040200 |
| N             | 0.00000000  | -0.77135500 | -0.12573400 |
| O             | 0.00000200  | -1.94867100 | -0.28507500 |
| C             | -1.35873700 | -0.06651800 | 0.00161600  |
| C             | 1.35873700  | -0.06651700 | 0.00161600  |
| C             | 2.38207700  | -0.91165500 | -0.73491800 |
| H             | 2.55184700  | -1.88056000 | -0.25576800 |
| H             | 2.09795200  | -1.07647700 | -1.78106900 |
| H             | 3.32781800  | -0.35704600 | -0.72684800 |
| C             | 1.66946800  | -0.05426600 | 1.50681100  |
| H             | 1.57565800  | -1.05654400 | 1.94241400  |
| H             | 2.71653900  | 0.25782700  | 1.60476900  |
| H             | 1.05547400  | 0.64880600  | 2.07596100  |
| C             | -1.66946900 | -0.05426500 | 1.50681000  |
| H             | -1.05547300 | 0.64880300  | 2.07596100  |
| H             | -2.71653900 | 0.25783100  | 1.60476700  |
| H             | -1.57566300 | -1.05654400 | 1.94241300  |
| C             | -2.38207900 | -0.91165400 | -0.73491800 |
| H             | -2.09795400 | -1.07647600 | -1.78106900 |
| H             | -2.55185000 | -1.88055900 | -0.25576700 |
| H             | -3.32781900 | -0.35704400 | -0.72684700 |
| <b>TS4</b>    |             |             |             |
| H             | 3.22185300  | 0.54518900  | 0.52221200  |
| C             | 2.80967900  | 0.49886200  | -0.49646500 |
| C             | 2.25285800  | -0.88711200 | -0.79202200 |
| C             | 1.75175800  | 1.57457200  | -0.69977900 |
| H             | 3.65846600  | 0.69545000  | -1.16342300 |
| H             | 3.00973100  | -1.66458200 | -0.61244600 |
| H             | 1.97250400  | -0.95111900 | -1.85563300 |
| H             | 2.15005300  | 2.56981200  | -0.45526200 |
| H             | 1.45461500  | 1.60011300  | -1.76059400 |
| N             | 0.04175500  | -0.07399200 | -0.12360300 |

|   |             |             |             |
|---|-------------|-------------|-------------|
| O | -0.65767300 | -0.18476600 | -1.23379900 |
| H | -1.58540100 | -1.21542700 | 1.32211100  |
| C | 0.48027900  | 1.35270800  | 0.13979800  |
| C | 1.00783400  | -1.23072200 | 0.04462300  |
| C | 0.35458600  | -2.50171800 | -0.48406400 |
| H | -0.52296500 | -2.79828600 | 0.11450000  |
| H | 0.05902000  | -2.42652100 | -1.53386000 |
| H | 1.07570700  | -3.32235600 | -0.39602900 |
| C | 1.36018800  | -1.45790600 | 1.51401700  |
| H | 0.47575300  | -1.44222000 | 2.16693100  |
| H | 1.81741600  | -2.44973900 | 1.61059400  |
| H | 2.07803900  | -0.74050400 | 1.91619400  |
| C | 0.71583800  | 1.59104000  | 1.62833000  |
| H | 1.63731400  | 1.15085700  | 2.01497500  |
| H | 0.79274600  | 2.67240300  | 1.79305000  |
| H | -0.12912900 | 1.22696300  | 2.22625500  |
| C | -0.62057400 | 2.30124300  | -0.31150900 |
| H | -0.88326800 | 2.18162000  | -1.36685400 |
| H | -1.51942000 | 2.18248900  | 0.31004300  |
| H | -0.26471400 | 3.32850200  | -0.17137400 |
| H | -1.69102400 | -0.35754500 | -1.00291700 |
| C | -2.82254800 | -0.69848800 | -0.04871800 |
| O | -2.14323700 | -0.46236500 | 1.05190800  |
| H | -2.89586100 | -1.74260700 | -0.37923900 |
| C | -3.85426900 | 0.29393400  | -0.41229300 |
| H | -3.50952000 | 1.31616900  | -0.21764800 |
| H | -4.15099400 | 0.19311300  | -1.46026600 |
| H | -4.74969500 | 0.12474700  | 0.20753100  |

**TS4'**

|   |             |             |             |
|---|-------------|-------------|-------------|
| O | 2.65612800  | -0.22976300 | -1.11452400 |
| H | -2.84044700 | 0.49532400  | 1.29067200  |
| C | -2.78925600 | 0.42528200  | 0.19465500  |
| C | -1.89830900 | 1.51291500  | -0.38308800 |
| C | -2.31826200 | -0.95055900 | -0.24816700 |
| H | -3.81737200 | 0.57816500  | -0.15542300 |
| H | -2.23548000 | 2.51108100  | -0.06871000 |
| H | -1.95317700 | 1.49088000  | -1.48180900 |
| H | -2.95591300 | -1.74048800 | 0.17444000  |
| H | -2.39850300 | -1.03096400 | -1.34289500 |
| N | -0.01223200 | -0.07686100 | -0.38968400 |
| O | 0.25955400  | -0.17026800 | -1.62007700 |
| C | 2.43867400  | -0.60337300 | 0.12327400  |
| H | 1.06679000  | -0.22884500 | 0.25434000  |

|   |             |             |             |
|---|-------------|-------------|-------------|
| H | 2.23046500  | -1.67278100 | 0.28700100  |
| C | -0.87660000 | -1.29367200 | 0.14675900  |
| C | -0.42653300 | 1.39645500  | 0.02184000  |
| C | 0.43690100  | 2.33637100  | -0.79888200 |
| H | 1.50408900  | 2.23047900  | -0.56668600 |
| H | 0.30133100  | 2.18969500  | -1.87280800 |
| H | 0.14443100  | 3.36363000  | -0.55050400 |
| C | -0.19726000 | 1.65050400  | 1.50179200  |
| H | 0.83203600  | 1.42262800  | 1.80852400  |
| H | -0.34412800 | 2.72311100  | 1.67773800  |
| H | -0.88405100 | 1.12516400  | 2.16772700  |
| C | -0.70349500 | -1.48910900 | 1.64482300  |
| H | -1.28148500 | -0.79292600 | 2.25645400  |
| H | -1.05709700 | -2.49666800 | 1.89482300  |
| H | 0.34736900  | -1.43892900 | 1.96388300  |
| C | -0.41841700 | -2.53669500 | -0.59492400 |
| H | -0.47264700 | -2.41878900 | -1.67942100 |
| H | 0.59705300  | -2.84927900 | -0.31687400 |
| H | -1.08632500 | -3.35834100 | -0.30957900 |
| C | 3.20858200  | 0.12217800  | 1.16547900  |
| H | 2.79920600  | -0.05434800 | 2.16533600  |
| H | 3.25547700  | 1.19600600  | 0.95666700  |
| H | 4.23958200  | -0.26272400 | 1.15607200  |
| H | 2.03281800  | -0.66458500 | -1.74571400 |

## TS5

|   |             |             |             |
|---|-------------|-------------|-------------|
| H | 3.28120700  | -0.02838500 | 1.05738700  |
| C | 3.15629800  | -0.02935400 | -0.03552100 |
| C | 2.40164700  | -1.26183200 | -0.49989100 |
| C | 2.43941600  | 1.22349800  | -0.50856300 |
| H | 4.17211500  | -0.04944700 | -0.44958000 |
| H | 2.90030800  | -2.18640300 | -0.17604200 |
| H | 2.38788200  | -1.27721800 | -1.60129800 |
| H | 2.97631100  | 2.13285100  | -0.20292700 |
| H | 2.40164500  | 1.22808000  | -1.60982600 |
| N | 0.31490200  | 0.01991600  | -0.29731200 |
| O | -0.54696000 | 0.04274100  | -1.25036500 |
| H | -1.60175600 | -0.41667600 | 1.62991100  |
| C | 0.99947500  | 1.33800000  | 0.02326700  |
| C | 0.93967900  | -1.33098500 | -0.01721000 |
| C | 0.20796200  | -2.40349600 | -0.80744300 |
| H | -0.84229600 | -2.49733900 | -0.50287700 |
| H | 0.24677400  | -2.22350500 | -1.88641000 |
| H | 0.69857100  | -3.36302000 | -0.60442900 |

|   |             |             |             |
|---|-------------|-------------|-------------|
| C | 0.84558600  | -1.67632100 | 1.46763500  |
| H | -0.20147100 | -1.82147000 | 1.77600300  |
| H | 1.34459900  | -2.63825300 | 1.63786400  |
| H | 1.31038800  | -0.94524800 | 2.13283300  |
| C | 0.99943900  | 1.63877900  | 1.52155800  |
| H | 1.64548200  | 0.97881000  | 2.10684300  |
| H | 1.38631400  | 2.65587200  | 1.66058300  |
| H | -0.01246400 | 1.61274900  | 1.93922800  |
| C | 0.26756100  | 2.45685900  | -0.69804700 |
| H | 0.22820800  | 2.30340400  | -1.78103400 |
| H | -0.75385600 | 2.58413900  | -0.31616500 |
| H | 0.80685400  | 3.39191000  | -0.50694900 |
| H | -1.62821200 | 0.05372000  | -0.85560400 |
| C | -2.64882700 | -0.02086600 | 0.08423100  |
| O | -1.92681400 | 0.36055800  | 1.13559300  |
| C | -3.62486500 | 0.99067800  | -0.42880900 |
| H | -3.14731400 | 1.97200900  | -0.50346000 |
| H | -4.00594700 | 0.70771000  | -1.41534100 |
| H | -4.46596800 | 1.06471800  | 0.27496700  |
| O | -2.98003400 | -1.32315300 | 0.14377200  |
| H | -3.60145400 | -1.56936100 | -0.56173000 |

**TS5'**

|   |             |             |             |
|---|-------------|-------------|-------------|
| O | 2.43972300  | 0.44192000  | -1.18090200 |
| H | -3.03525900 | 0.11221800  | 1.35719200  |
| C | -3.00496000 | 0.06151100  | 0.25947300  |
| C | -2.30358700 | 1.27486800  | -0.32798700 |
| C | -2.34341900 | -1.22110500 | -0.21368900 |
| H | -4.05411400 | 0.05978300  | -0.06073000 |
| H | -2.77422500 | 2.20901800  | 0.01062000  |
| H | -2.38378900 | 1.25759700  | -1.42544300 |
| H | -2.83391000 | -2.10350000 | 0.22223800  |
| H | -2.45313000 | -1.30569900 | -1.30546300 |
| N | -0.20465300 | -0.01126100 | -0.42477800 |
| O | 0.05156500  | -0.04358700 | -1.64501400 |
| C | 2.35763800  | -0.03460900 | 0.04703900  |
| H | 1.00140200  | 0.02267500  | 0.22540200  |
| C | -0.84693900 | -1.35431800 | 0.11325100  |
| C | -0.81863500 | 1.37289300  | 0.04239800  |
| C | -0.13535900 | 2.46108200  | -0.76362800 |
| H | 0.92514700  | 2.56867100  | -0.50476000 |
| H | -0.21245300 | 2.28897600  | -1.83952100 |
| H | -0.63153800 | 3.41063000  | -0.52975700 |
| C | -0.61571900 | 1.62209000  | 1.52749000  |



|   |             |             |             |
|---|-------------|-------------|-------------|
| H | 0.42471100  | 1.47738400  | 1.84310800  |
| H | -0.85834200 | 2.67424900  | 1.72026800  |
| H | -1.26035200 | 1.02602700  | 2.17646200  |
| C | -0.57706800 | -1.55056800 | 1.59551600  |
| H | -1.18735600 | -0.92840200 | 2.25357900  |
| H | -0.80339400 | -2.59453600 | 1.84400300  |
| H | 0.47907000  | -1.38727300 | 1.84972600  |
| C | -0.26547400 | -2.50651000 | -0.68758500 |
| H | -0.40924900 | -2.37032100 | -1.76217700 |
| H | 0.79855800  | -2.66632900 | -0.48939600 |
| H | -0.80296400 | -3.41472400 | -0.38856100 |
| C | 2.94613500  | 0.86356200  | 1.09538300  |
| H | 2.66946400  | 0.53461000  | 2.10355000  |
| H | 2.62174900  | 1.89744600  | 0.94896000  |
| H | 4.03955500  | 0.82757600  | 0.99825800  |
| H | 2.01999300  | -0.16398700 | -1.83219300 |
| O | 2.63322800  | -1.35565000 | 0.12468900  |
| H | 2.80118300  | -1.62810000 | 1.04192100  |

## References:

1. For the method for preparation of TEMPO<sup>+</sup>NO<sub>3</sub><sup>-</sup>, see: (a) M. Shibuya, Y. Osada, Y. Sasano, M. Tomizawa and Y. Iwabuchi, *J. Am. Chem. Soc.*, 2011, **133**, 6497. For the characterization of TEMPO<sup>+</sup>NO<sub>3</sub><sup>-</sup>, see: (b) S. Chou, J. A. Nelson and T. A. Spencer, Oxidation and mass spectra of 4,4-dimethylloxazolidine-*N*-oxyl (doxyl) derivatives of ketones, *J. Org. Chem.*, 1974, **39**, 2356.
2. R. C. Walroth, K. C. Miles, J. T. Lukens, S. N. MacMillan, S. S. Stahl and K. M. Lancaster, *J. Am. Chem. Soc.*, 2017, **139**, 13507.
3. J.-T. Zhang, H.-Y. Wang, W. Zhu, T.-T. Cai and Y.-L. Guo, *Anal. Chem.*, 2014, **86**, 8937.
4. Gaussian 16, Revision A.03, M. J. Frisch, G. W. Trucks, H. B. Schlegel, G. E. Scuseria, M. A. Robb, J. R. Cheeseman, G. Scalmani, V. Barone, G. A. Petersson, H. Nakatsuji, X. Li, M. Caricato, A. V. Marenich, J. Bloino, B. G. Janesko, S. R. Gomperts, B. Mennucci, H. P. Hratchian, J. V. Ortiz, A. F. Izmaylov, J. L. Sonnenberg, D. Williams-Young, F. Ding, F. Lipparini, F. Egidi, J. Goings, B. Peng, A. Petrone, T. Henderson, D. Ranasinghe, V. G. Zakrzewski, J. Gao, N. Rega, G. Zheng, W. Liang, M. Hada, M. Ehara, K. Toyota, R. Fukuda, J. Hasegawa, M. Ishida, T. Nakajima, Y. Honda, O. Kitao, H. Nakai, T. Vreven, K. Throssell, J. A. Montgomery Jr., J. E. Peralta, F. Ogliaro, M. J. Bearpark, J. J. Heyd, E. N. Brothers, K. N. Kudin, V. N. Staroverov, T. A. Keith, R. Kobayashi, J. Normand, K. Raghavachari, A. P. Rendell, J. C. Burant, S. S. Iyengar, J. Tomasi, M. Cossi, J. M. Millam, M. Klene, C. Adamo, R. Cammi, J. W. Ochterski, R. L. Martin, K. Morokuma, O. Farkas, J. B. Foresman and D. J. Fox, Gaussian, Inc., Wallingford CT, 2016. P. C. Hariharan and J. A. Pople, *Theor. Chim. Acta* 1973, **28**.
5. (a) Y. Zhao and D. G. Truhlar, *Acc. Chem. Res.*, 2008, **41**, 157; (b) Y. Zhao and D. G. Truhlar, *Theor. Chem. Acc.*, 2008, **120**, 215.
6. (a) P. J. Hay and W. R. Wadt, *J. Chem. Phys.*, 1985, **82**, 270; (b) P. J. Hay and W. R. Wadt, *J. Chem. Phys.*, 1985, **82**, 299; (c) W. R. Wadt, P. J. Hay, *J. Chem. Phys.*, 1985, **82**, 284.
7. (a) T. H. Dunning, Jr. and P. J. Hay, *Modern Theoretical Chemistry*. H. F. Schaefer, I., Ed. Plenum Press: New York, 1977; pp 1; (b) K. Fukui, *Acc. Chem. Res.*, 1981, **14**, 363.
8. (a) K. Fukui, *J. Phys. Chem.*, 1970, **74**, 4161; (b) C. Gonzalez and H. B. Schlegel, *J. Chem. Phys.* 1989, **90**, 2154; (c) C. Gonzalez and H. B. Schlegel, *J. Phys. Chem.*, 1990, **94**, 5523.
9. D. Andrae, U. Haeussermann, M. Dolg, H. Stoll, Preuss, H., *Theor. Chim. Acta* 1990, **77**, 123.
10. A. V. Marenich, C. J. Cramer and D. G. Truhlar, *J. Phys. Chem. B* 2009, **113**, 6378.
11. (a) P. Gamez, I. W. C. E. Arends, J. Reedijk and R. A. Sheldon, *Chem. Commun.*, 2003, 2414; (b) B. L. Ryland, S. D. McCann, T. C. Brunold and S. S. Stahl, *J. Am. Chem. Soc.*, 2014, **136**, 12166.
12. J. E. Nutting, K. Mao and S. S. Stahl, *J. Am. Chem. Soc.*, 2021, **143**, 10565.
13. For selected reviews on oxoammonium cation catalyzed oxidation of alcohols affording aldehydes or ketones, see: (a) A. E. J. de Nooy, A. C. Besemer and H. van Bekkum, *Synthesis*, 1996, **10**, 1153; (b) W. Adam, C. R. Saha-Möller and P. A. Ganeshpure, *Chem. Rev.*, 2001, **101**, 3499; (c) L. Tebben and A. Studer, *Angew. Chem. Int. Ed.*, 2011, **50**, 5034.
14. J. J. Scepaniak, A. M. Wright, R. A. Lewis, G. Wu and T. W. Hayton, *J. Am. Chem. Soc.*, 2012, **134**, 19350.

Wb-5-162-H  
May 08 2021  
SOLVENT: CDCl3  
NA = 4  
F1 = 400.130005 MHz

*n*-C<sub>15</sub>H<sub>31</sub>COOH  
**2a**  
[<sup>16</sup>O]<sub>2</sub>: [<sup>16</sup>O][<sup>18</sup>O]  
80%: 20%

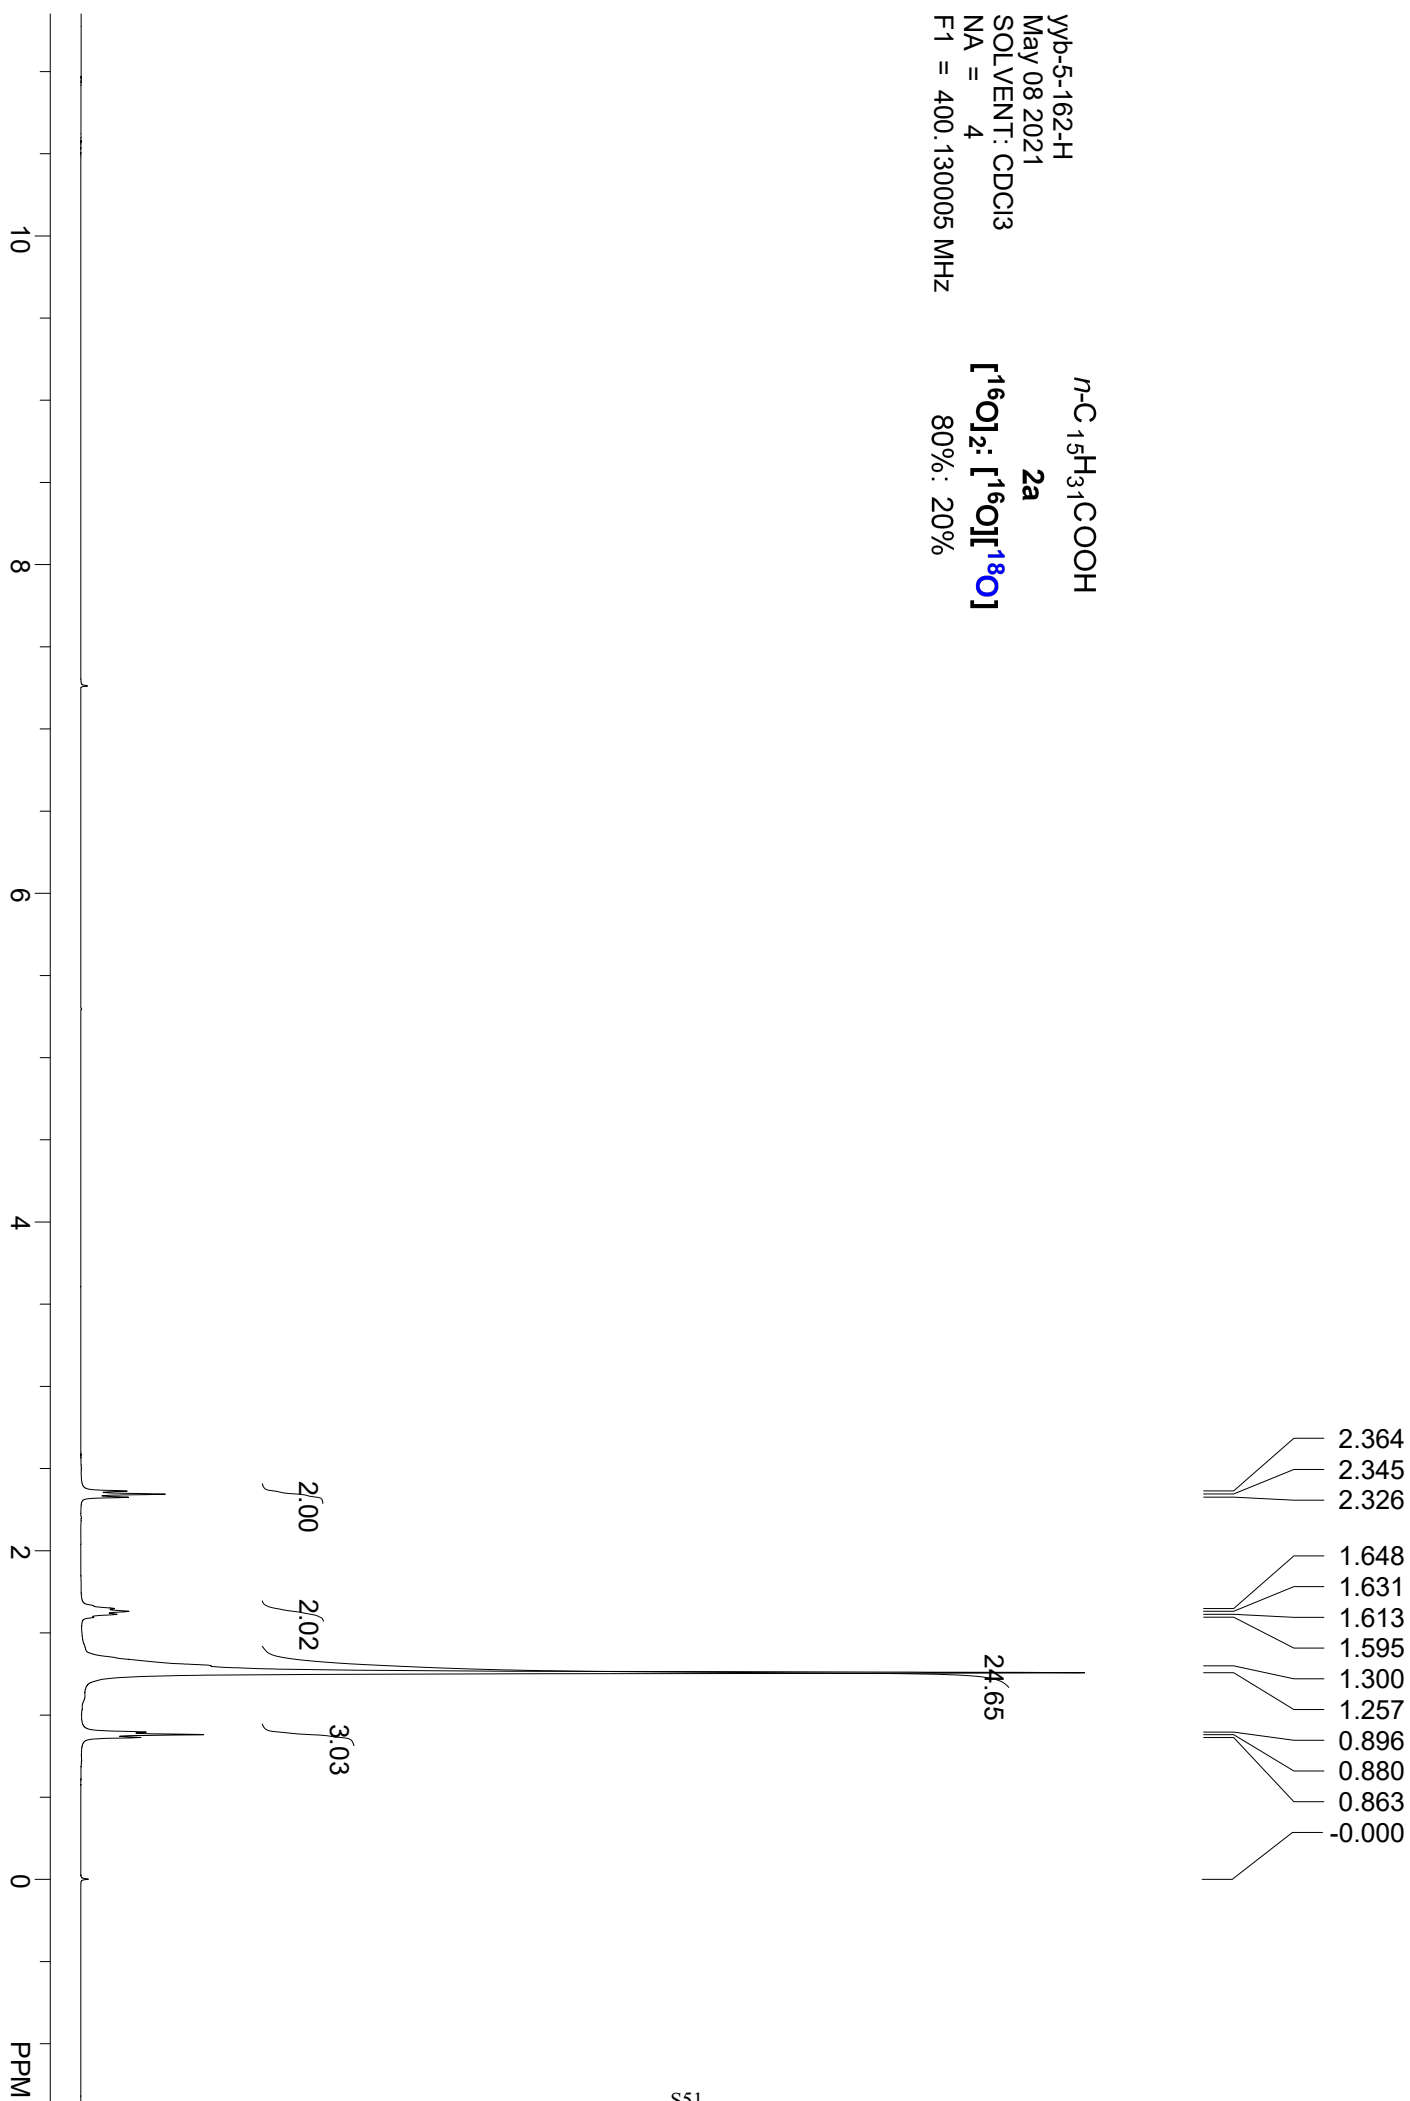

180.435

77.324  
77.000  
76.684

34.095  
31.923  
29.679  
29.663  
29.584  
29.426  
29.355  
29.237  
29.055  
24.663  
22.680  
14.092

yyb-5-162-C  
May 08 2021  
SOLVENT: CDCl3  
NA = 81  
F1 = 100.612770 MHz

*n*-C<sub>15</sub>H<sub>31</sub>COOH  
**2a**  
[<sup>16</sup>O]<sub>2</sub>: [<sup>16</sup>O][<sup>18</sup>O]  
80%: 20%

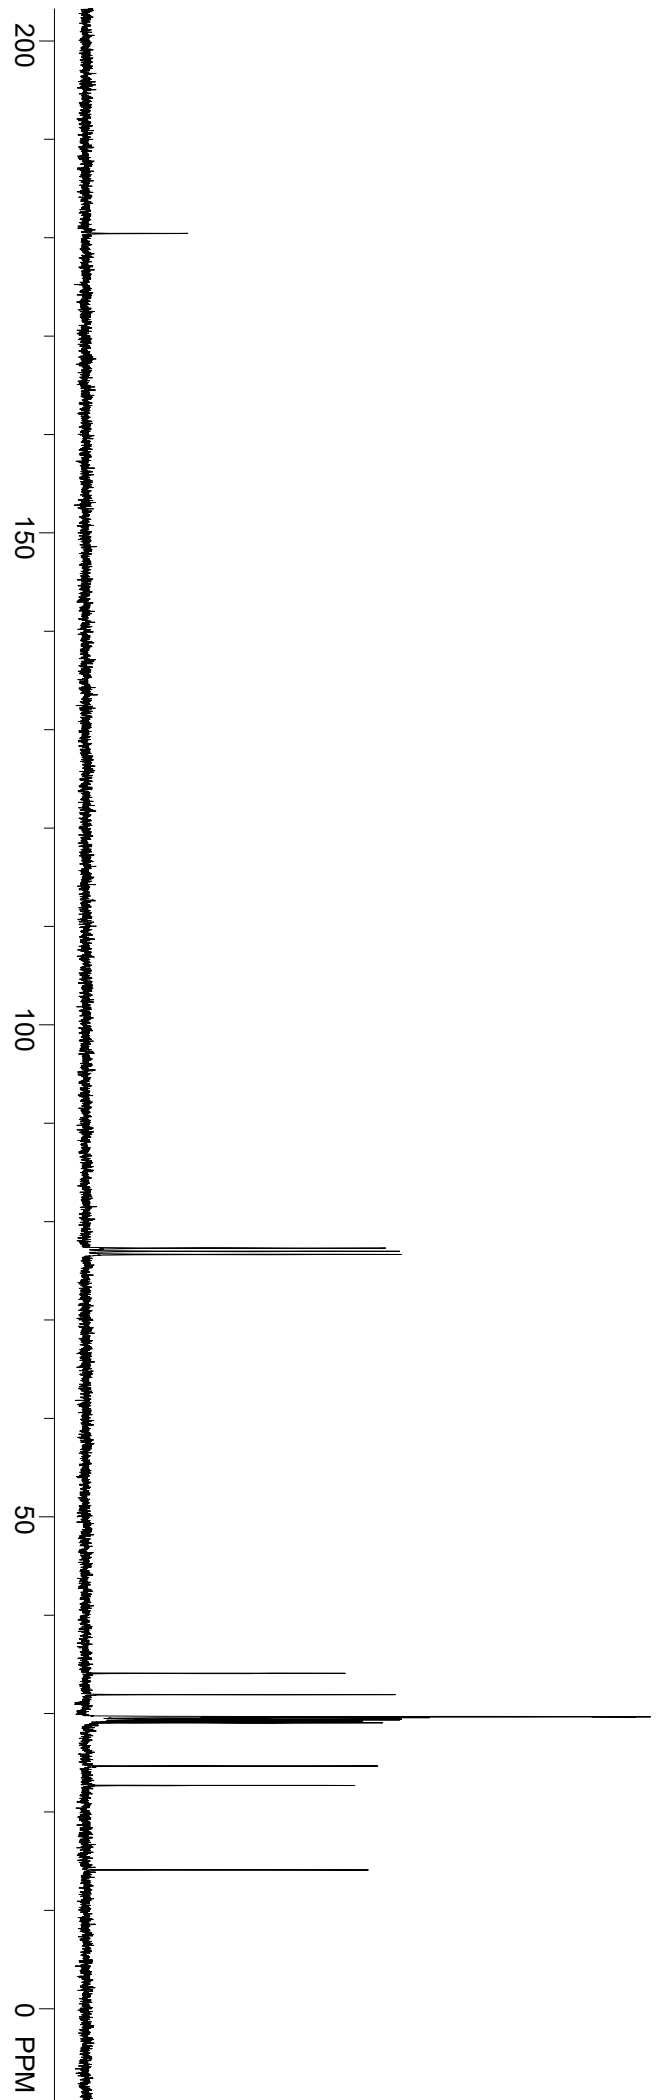

Ywb-5-178-H  
May 18 2021  
SOLVENT: CDCl3  
NA = 4  
F1 = 400.130005 MHz

*n*-C<sub>15</sub>H<sub>31</sub>COOH

**2a**

[<sup>16</sup>O]<sub>2</sub>: [<sup>16</sup>O][<sup>18</sup>O]: [<sup>18</sup>O]<sub>2</sub>

50%: 42%: 8%

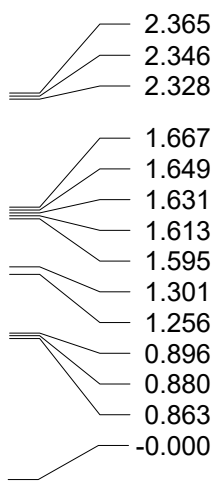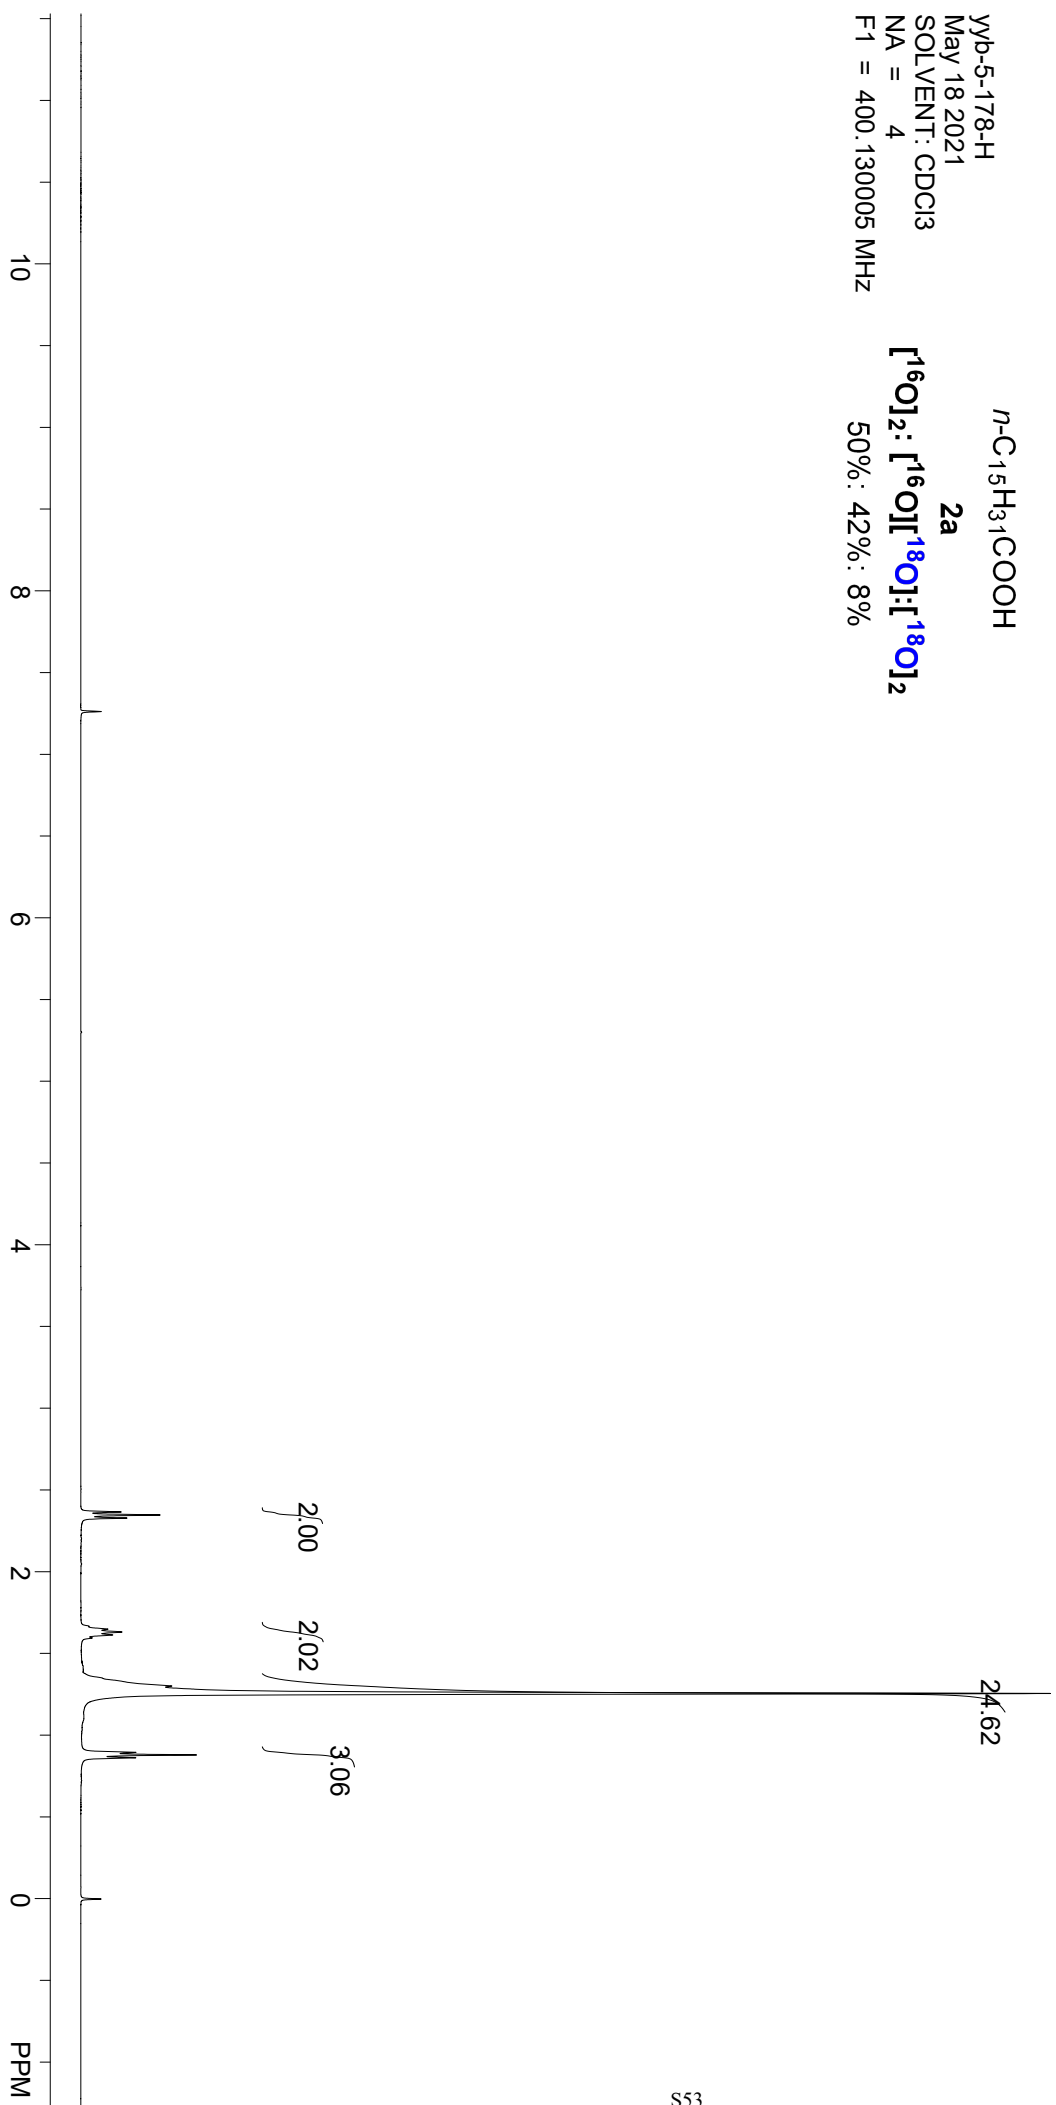

yyb-5-178-C  
May 18 2021  
SOLVENT: CDCl3  
NA = 200  
F1 = 100.612770 MHz

$n\text{-C}_{15}\text{H}_{31}\text{COOH}$   
**2a**  
[ $^{16}\text{O}$ ]<sub>2</sub>: [ $^{16}\text{O}$ ][ $^{18}\text{O}$ ]: [ $^{18}\text{O}$ ]<sub>2</sub>  
50% : 42% : 8%

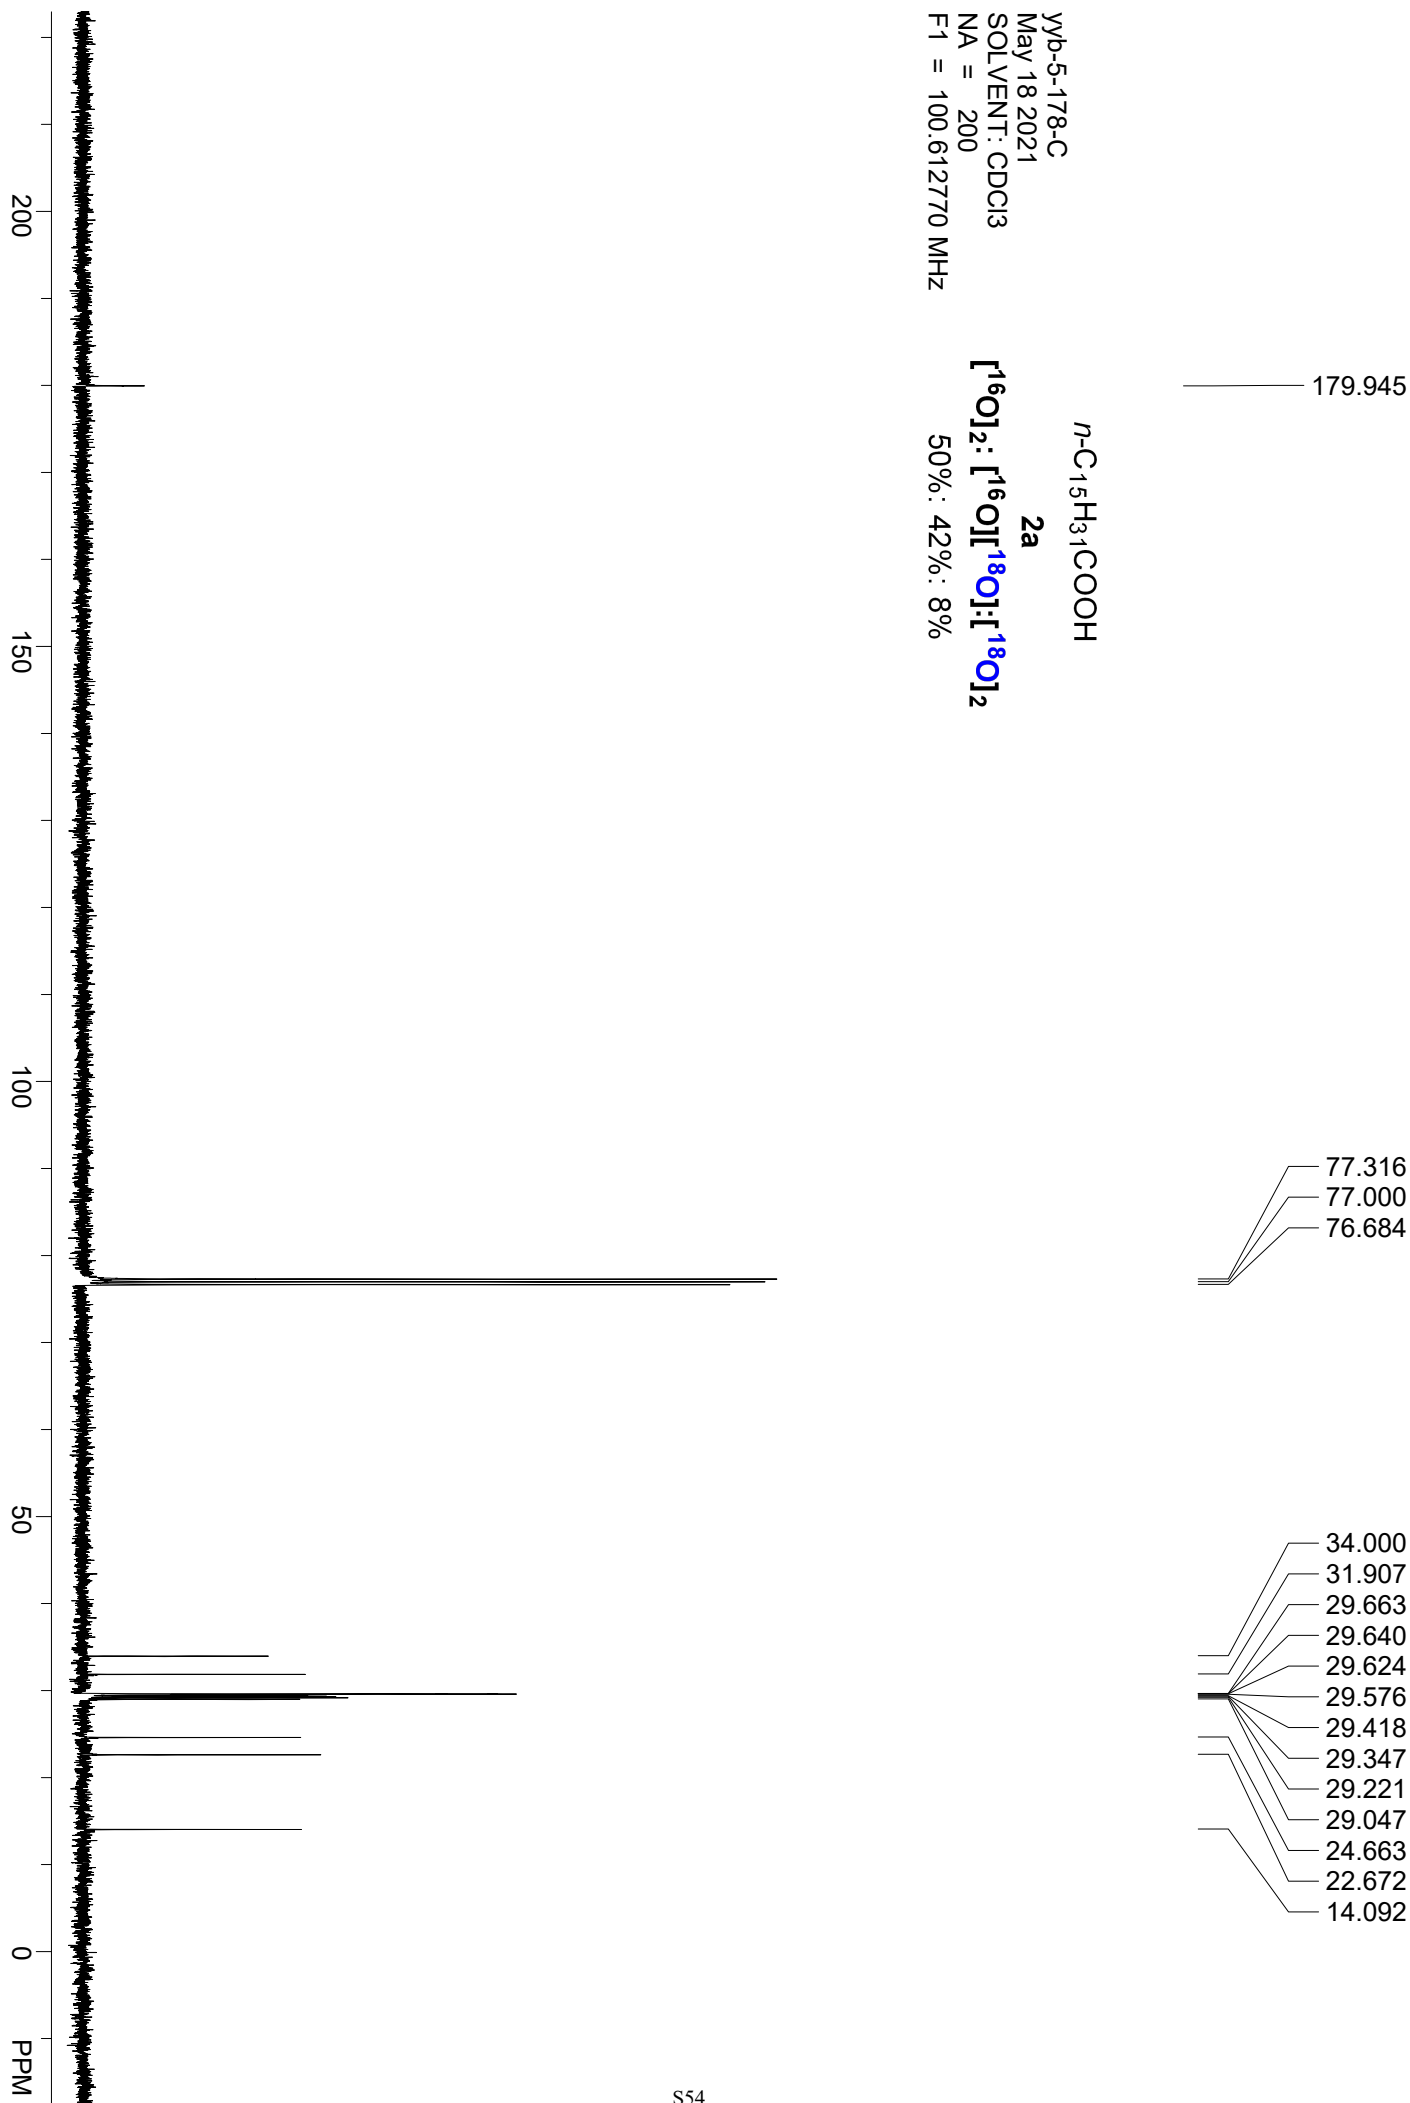

yyb-8-047-H  
Jun 16 2022  
SOLVENT: CDCl3  
NA = 4  
F1 = 400.130005 MHz

*n*-C<sub>15</sub>H<sub>31</sub>COOH  
**2a**  
[<sup>16</sup>O]<sub>2</sub>: [<sup>16</sup>O]<sub>1</sub>[<sup>18</sup>O]<sub>1</sub>: [<sup>18</sup>O]<sub>2</sub>  
61%: 33%: 6%

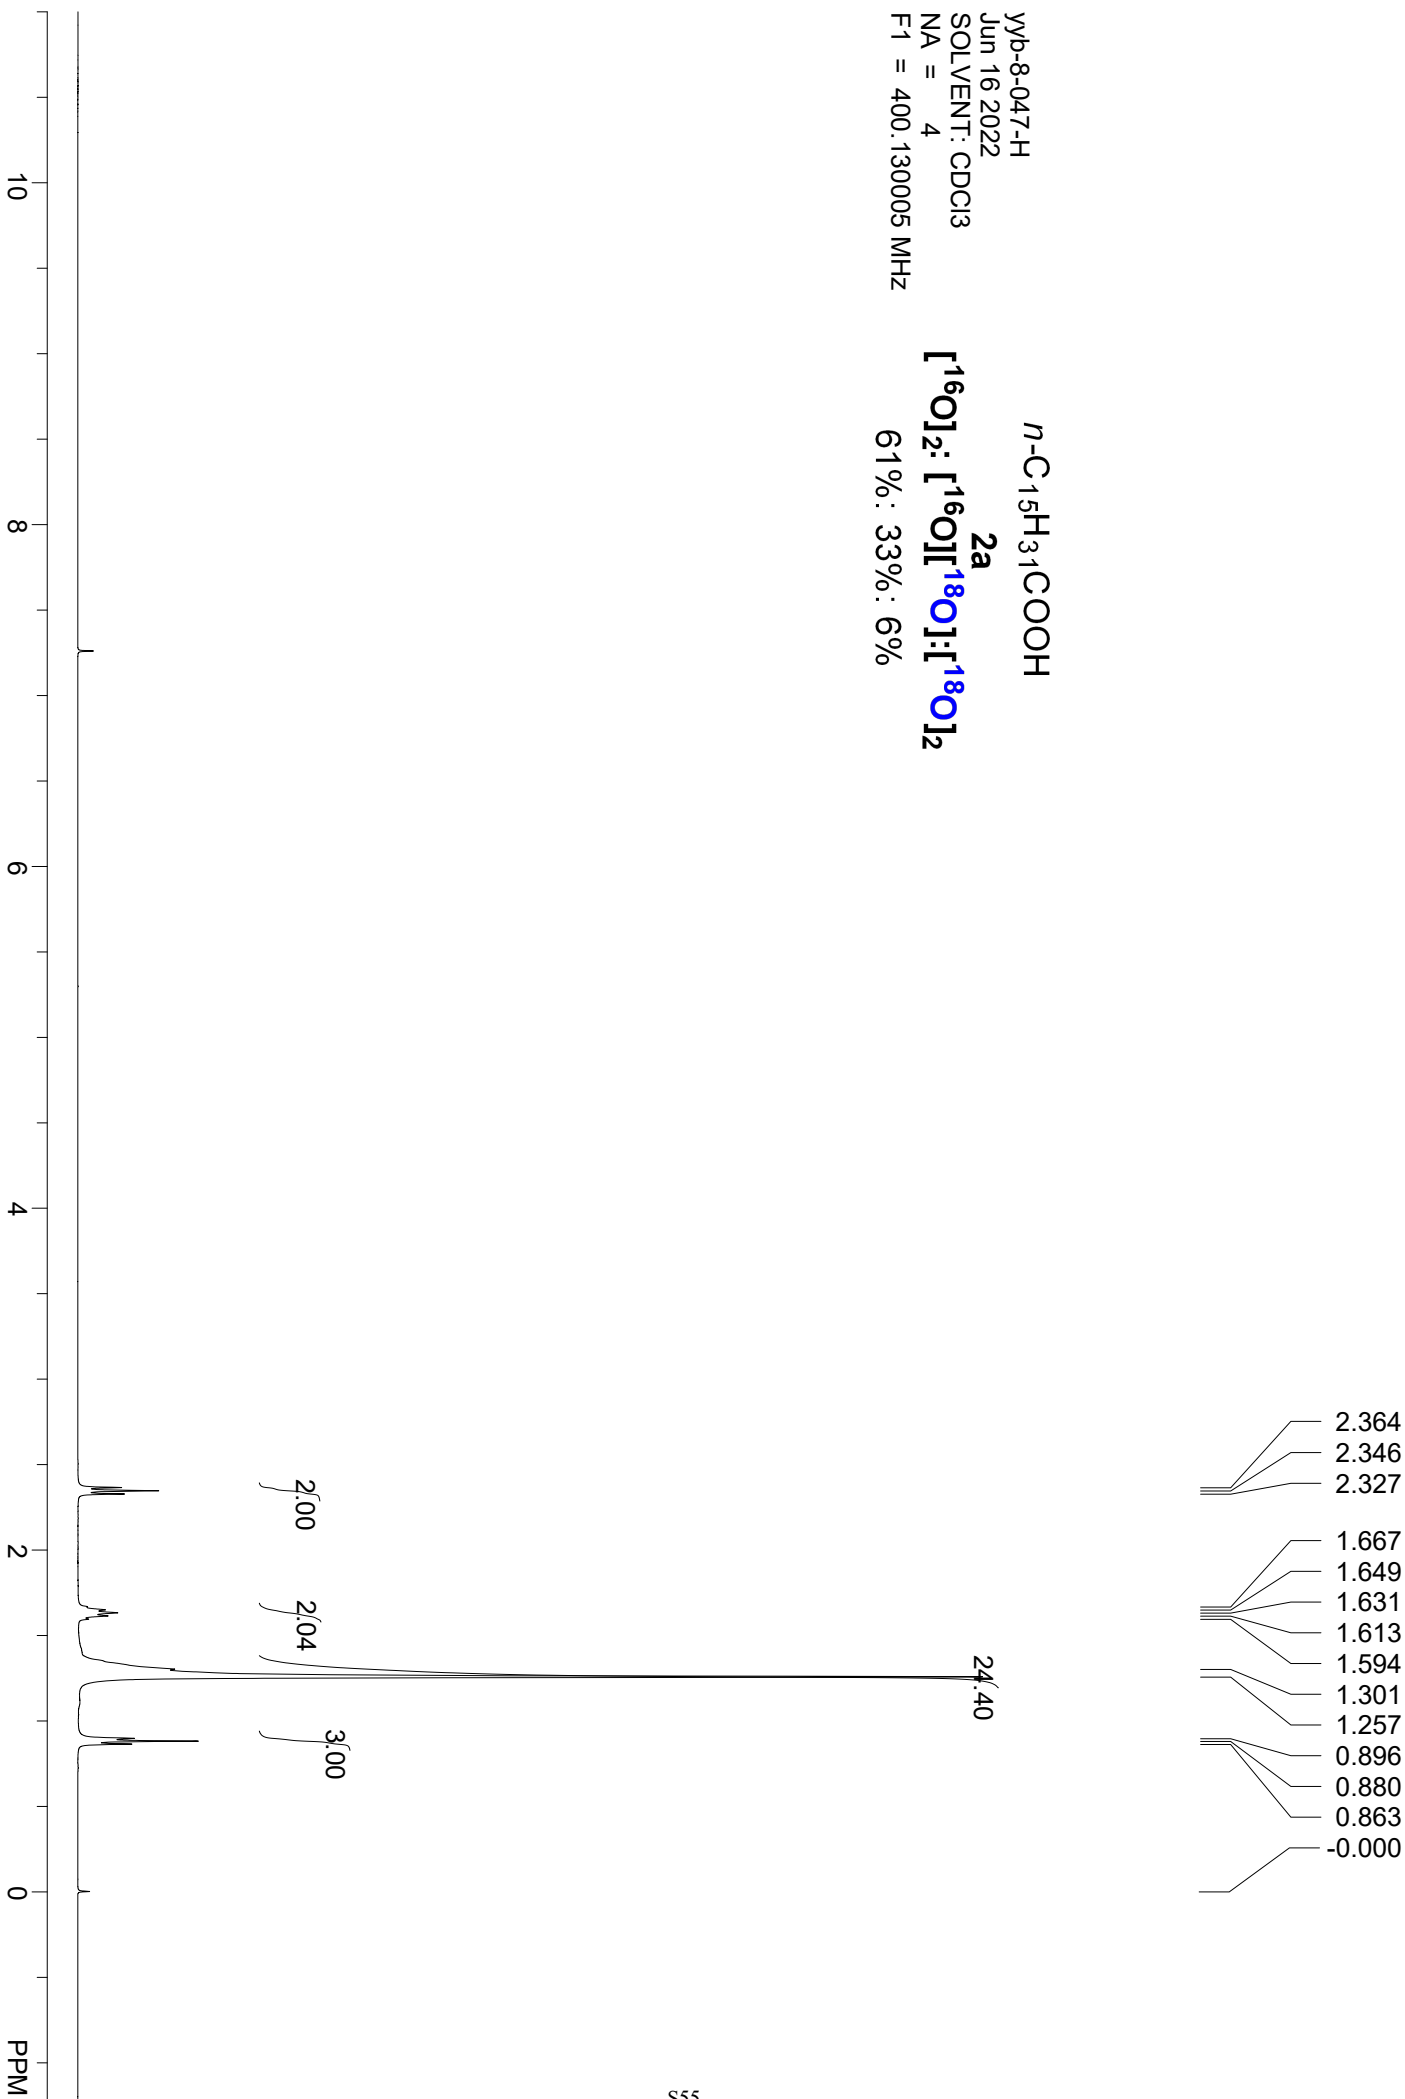

yyb-8-047-C  
Jun 16 2022  
SOLVENT: CDCl3  
NA = 128  
F1 = 100.612770 MHz

*n*-C<sub>15</sub>H<sub>31</sub>COOH  
**2a**  
[<sup>16</sup>O]<sub>2</sub>: [<sup>16</sup>O]<sub>1</sub>[<sup>18</sup>O]<sub>1</sub>: [<sup>18</sup>O]<sub>2</sub>  
61%: 33%: 6%

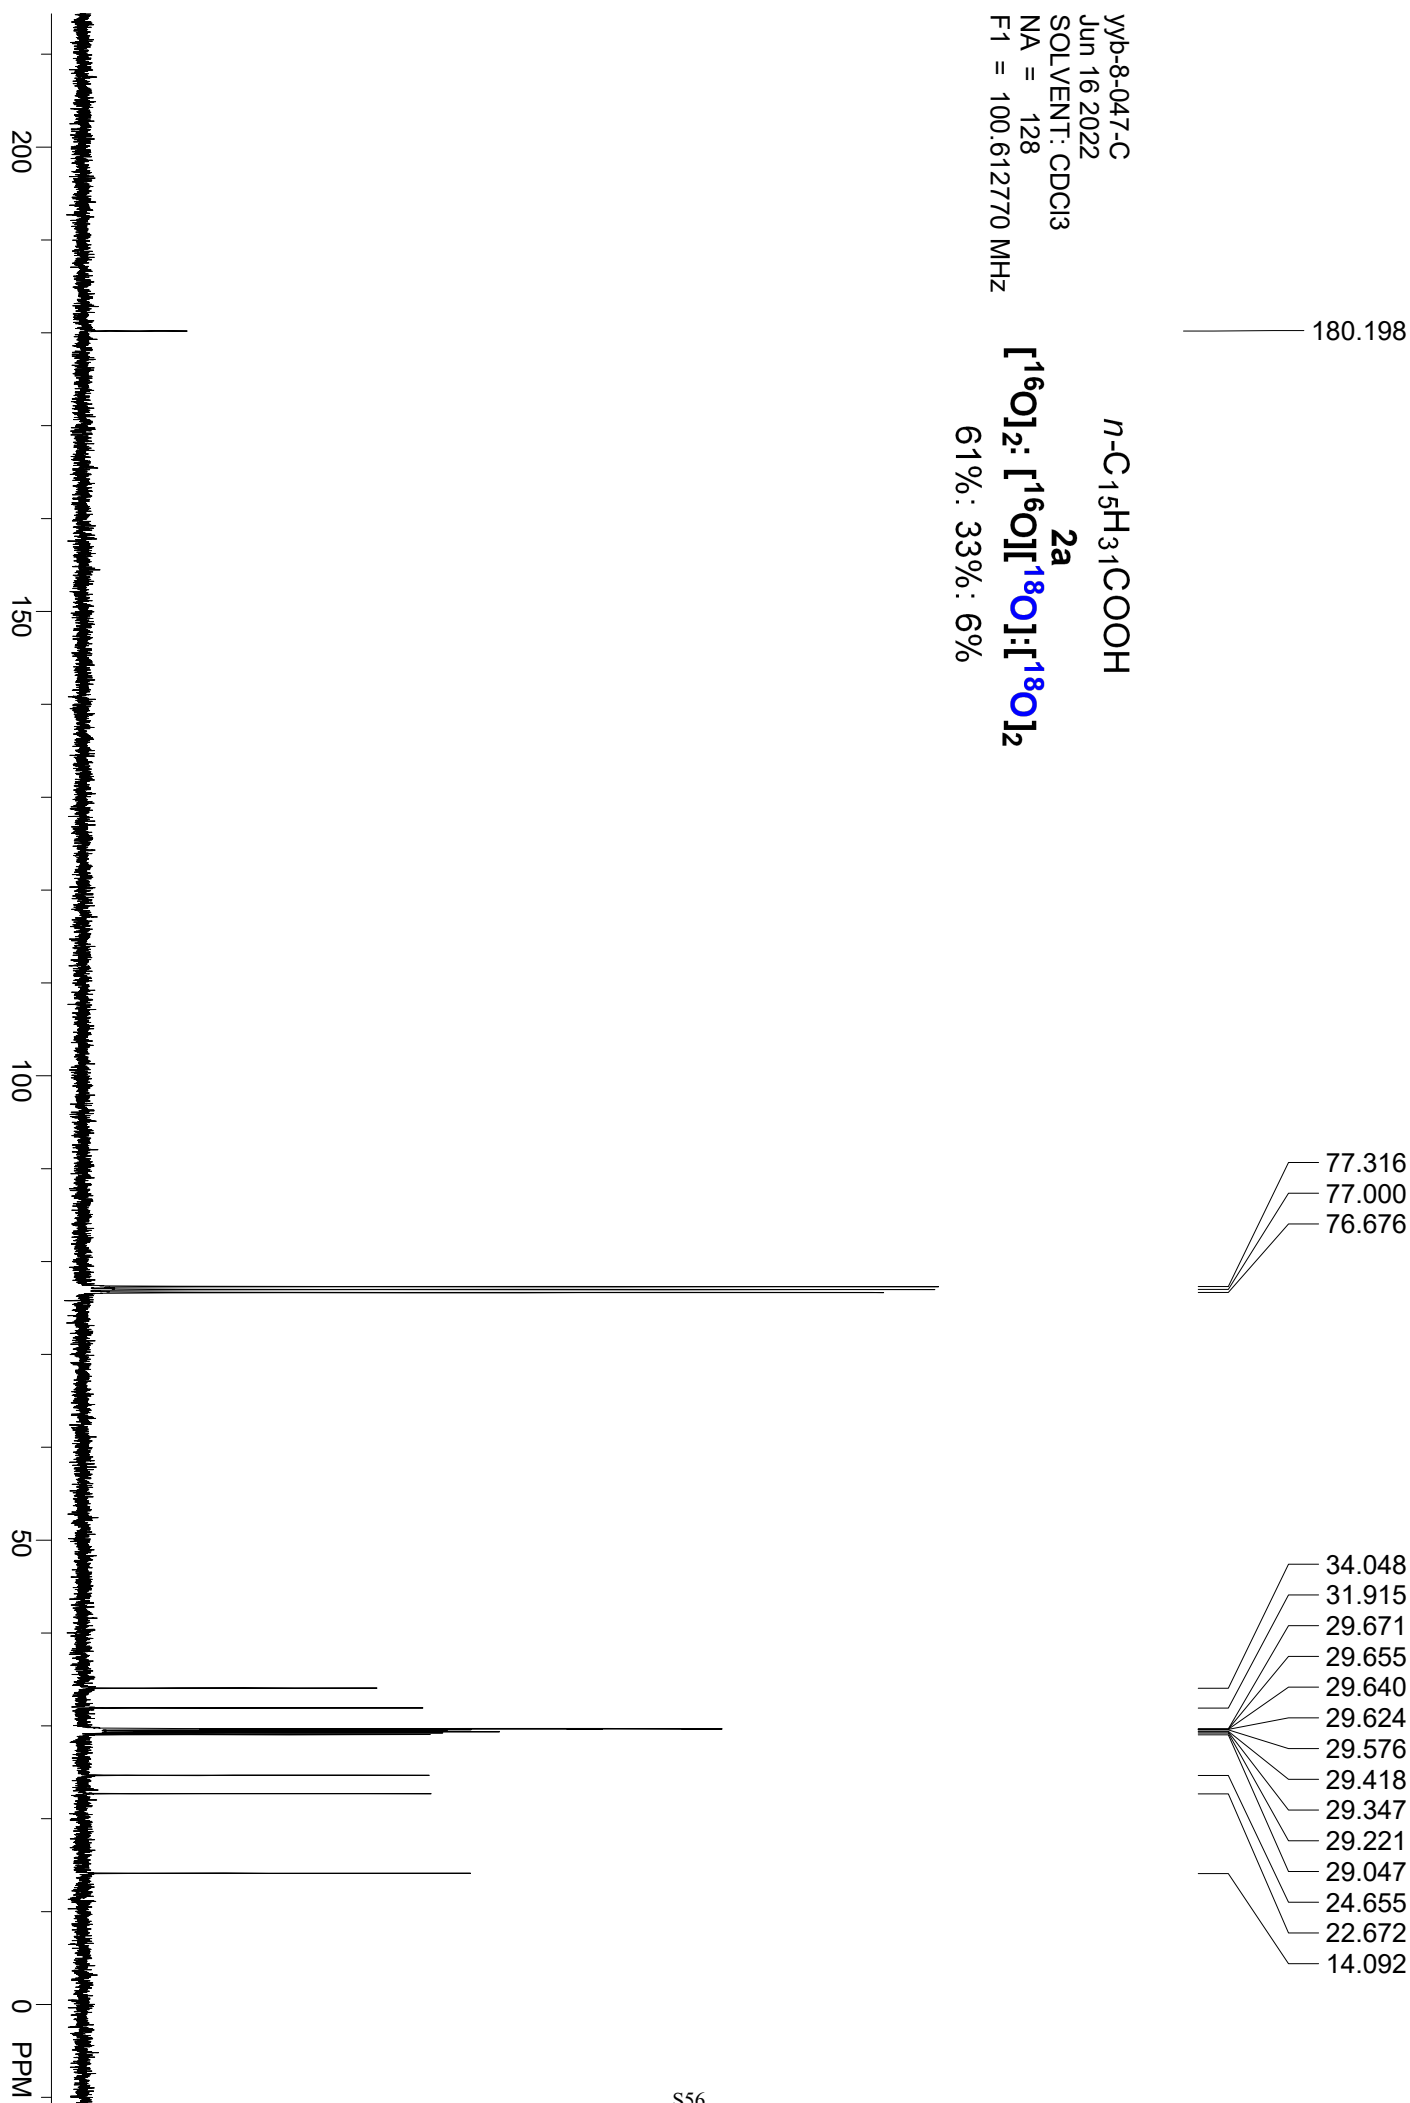



yyb-8-046-H  
Jun 16 2022  
SOLVENT: CDCl3  
NA = 4  
F1 = 400.130005 MHz

*n*-C<sub>15</sub>H<sub>31</sub>COOH  
**2a**  
[<sup>16</sup>O]<sub>2</sub>: [<sup>16</sup>O][<sup>18</sup>O]: [<sup>18</sup>O]<sub>2</sub>

56%: 37%: 7%

- 2.363
- 2.345
- 2.326
- 1.648
- 1.631
- 1.613
- 1.594
- 1.301
- 1.257
- 0.896
- 0.880
- 0.863
- 0.000

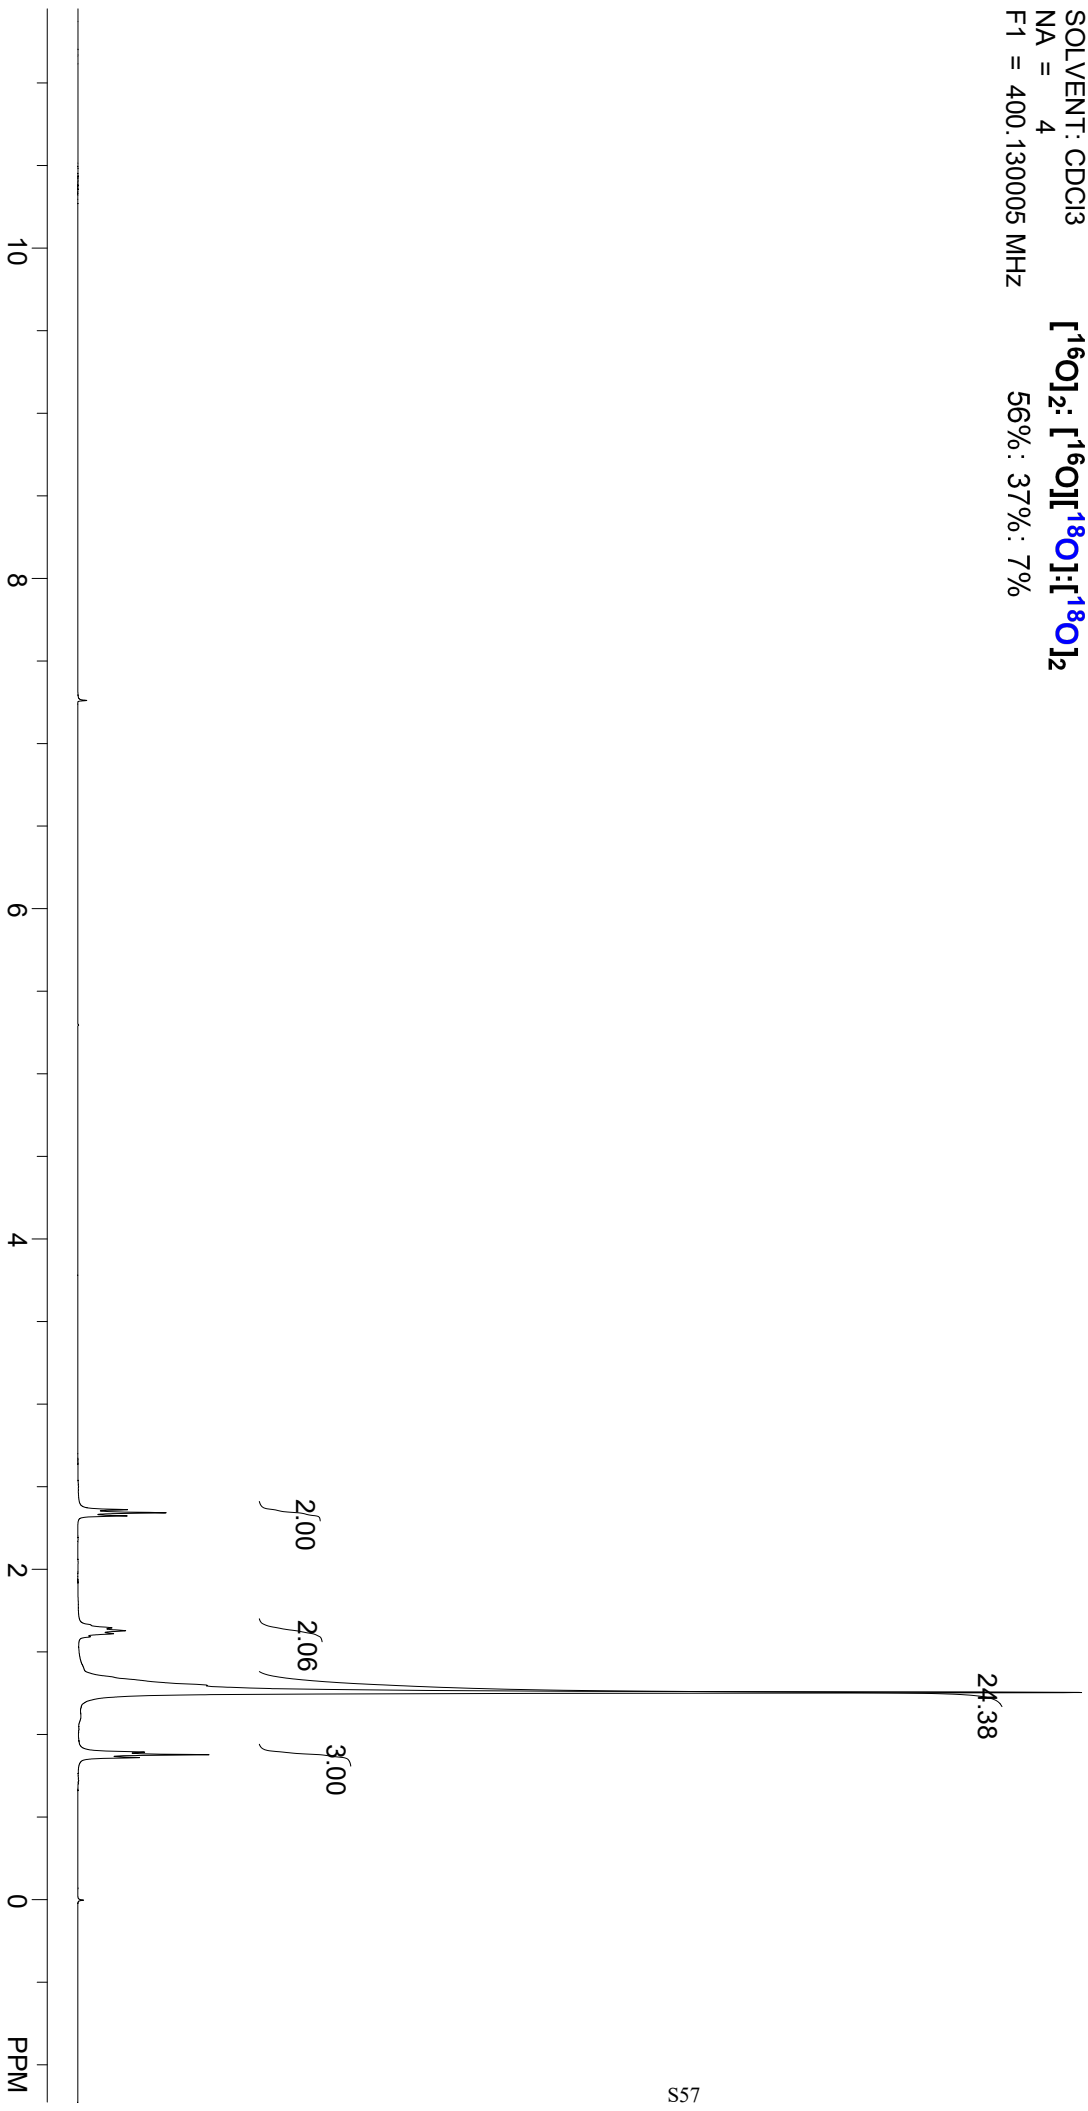

180.403

77.316  
77.000  
76.684

34.087  
31.915  
29.671  
29.655  
29.576  
29.418  
29.347  
29.229  
29.047  
24.655  
22.672  
14.084

yrb-8-046-C  
Jun 16 2022  
SOLVENT: CDCl3  
NA = 128  
F1 = 100.612770 MHz

*n*-C<sub>15</sub>H<sub>31</sub>COOH  
**2a**  
[<sup>16</sup>O]<sub>2</sub>: [<sup>16</sup>O][<sup>18</sup>O]: [<sup>18</sup>O]<sub>2</sub>  
56%: 37%: 7%

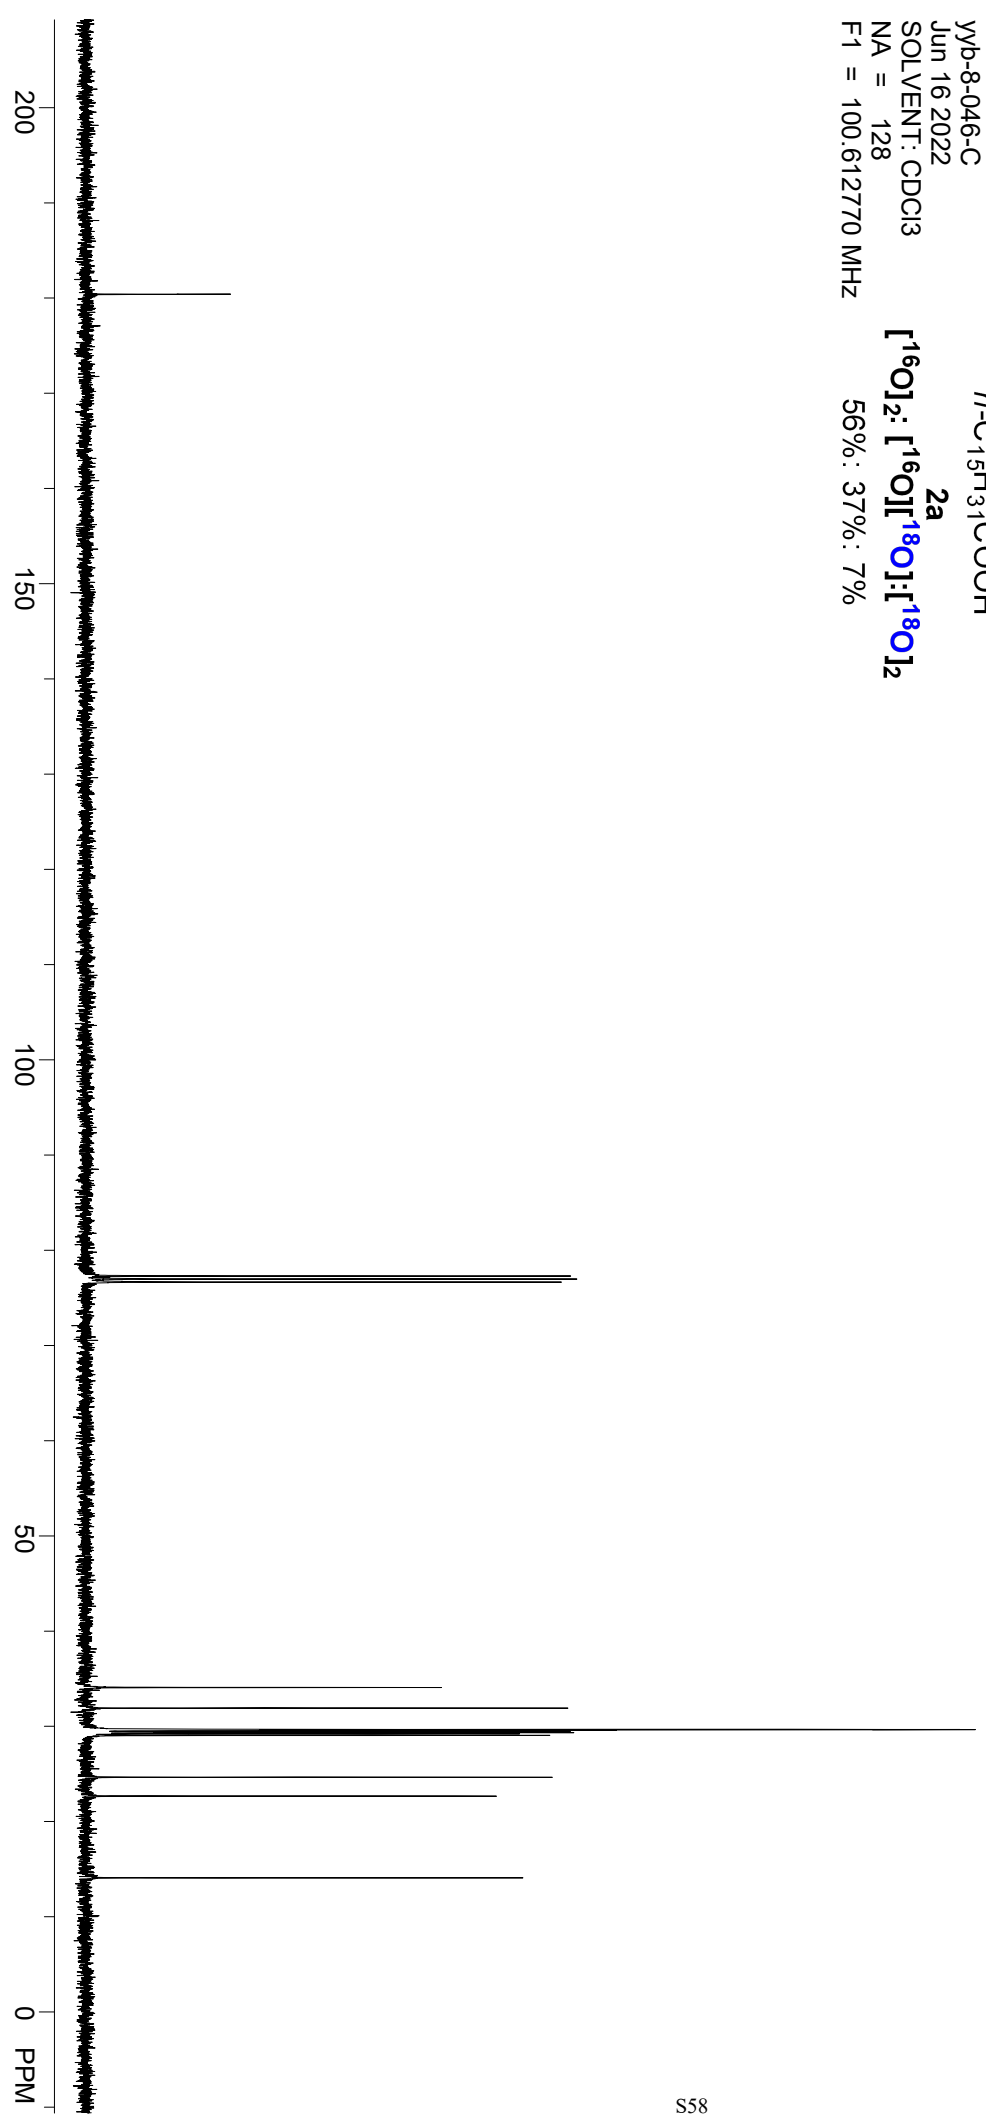

yyb-8-063-H  
Jun 24 2022  
SOLVENT: CDCl3  
NA = 4  
F1 = 400.130005 MHz

*n*-C<sub>15</sub>H<sub>31</sub>COOH  
**2a**  
[<sup>16</sup>O]<sub>2</sub>: [<sup>16</sup>O][<sup>18</sup>O]: [<sup>18</sup>O]<sub>2</sub>  
36%: 47%: 17%

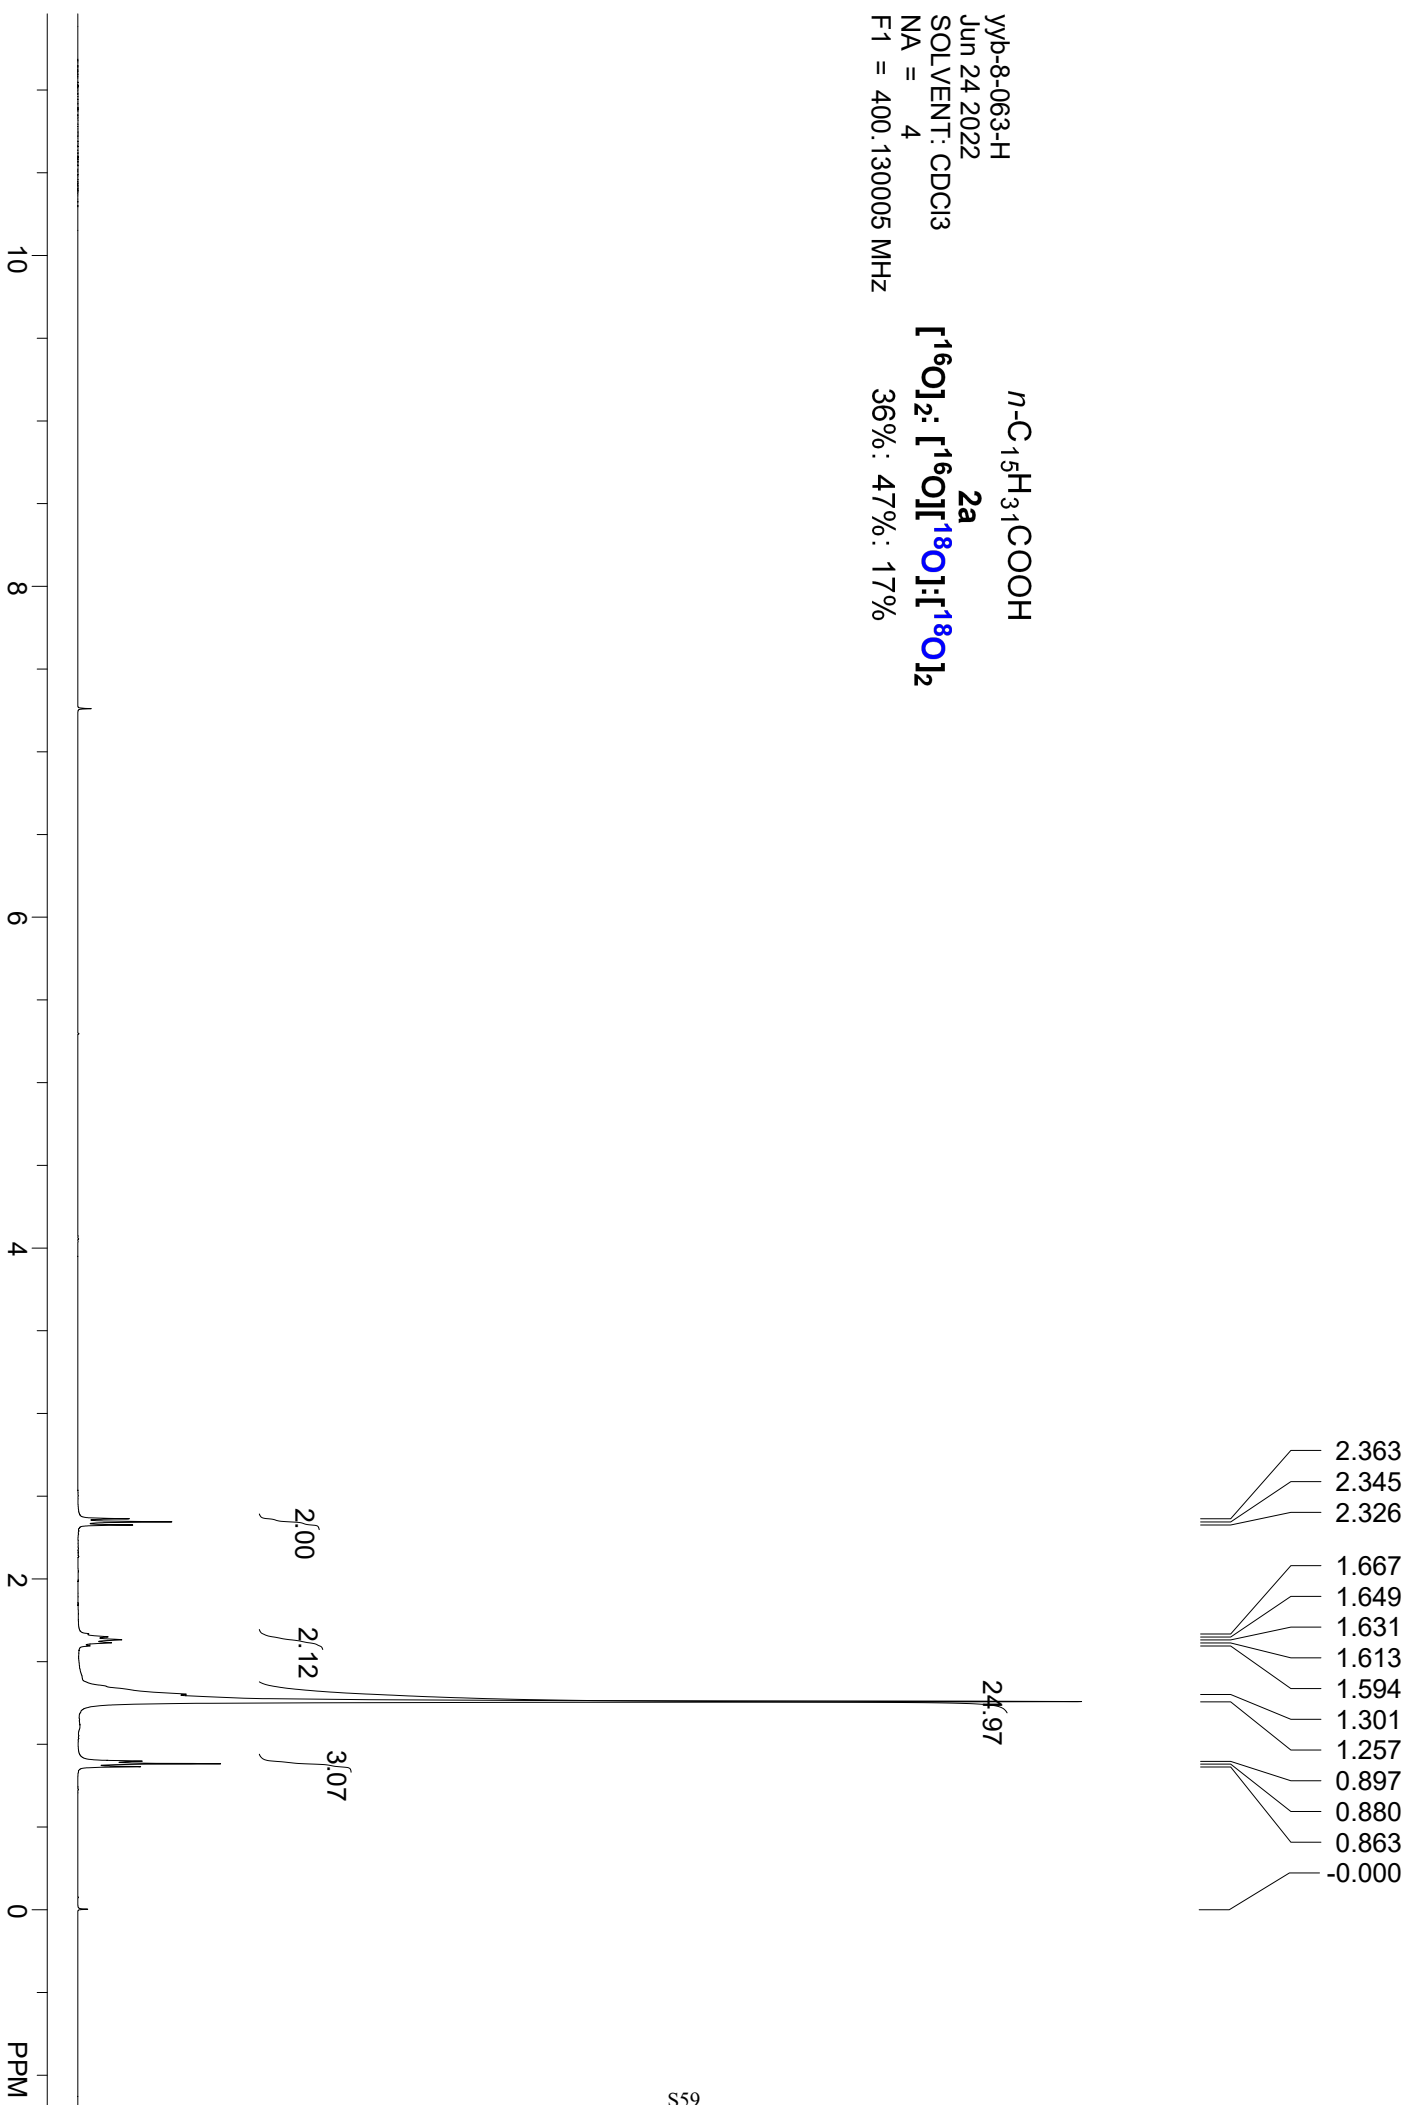

180.316  
180.300

yyb-8-063-C *n*-C<sub>15</sub>H<sub>31</sub>COOH  
Jun 24 2022  
SOLVENT: CDCl<sub>3</sub>  
NA = 128  
F1 = 100.612770 MHz  
**2a**  
[<sup>16</sup>O]<sub>2</sub>: [<sup>16</sup>O][<sup>18</sup>O]: [<sup>18</sup>O]<sub>2</sub>  
36%: 47%: 17%

77.316  
77.000  
76.684

34.071  
31.915  
29.671  
29.655  
29.640  
29.624  
29.576  
29.418  
29.347  
29.221  
29.047  
24.655  
22.672  
14.084

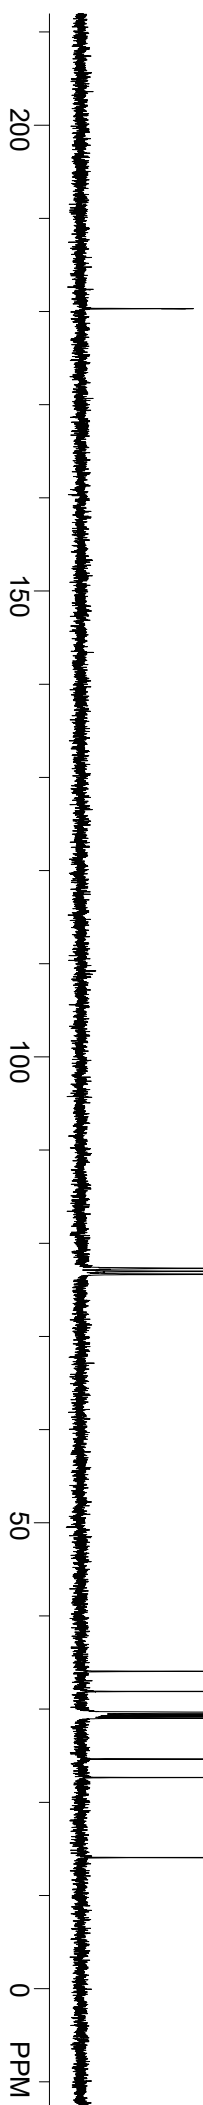

Supplement: d4qo00791c1.pdf [file d4qo00791c1.pdf]
